# Supplementary material for: If You’re House Is Still Available, Send Me an Email: Personality Influences Reactions to Written Errors in Email Messages
Source: PLoS One. 2016 Mar 9;11(3):e0149885. doi: 10.1371/journal.pone.0149885 (PMC4784893; doi:10.1371/journal.pone.0149885)
Supplement: S3 Appendix — (CSV) [file pone.0149885.s003.csv]

ResponseID	list	msg	typos	gram_err	friends	similar	consci	less intell	intell	sophis	friendly	considerate	housemate	likeable	trust	flowed	education	age	reads	Ecommunication	Grammar	Bothered	Noticed	Extraver	Agree	Consci	Neur	Open	Scale
R_00VGakVwRF9XxUF	3	Adrian	0	0	5	3	5	3	5	3	5	6	5	6	6	6	4	32	6	2	5	2	1	1.875	3.555555556	3.111111111	3.875	3.9	5
R_00VGakVwRF9XxUF	3	Alex	0	0	5	3	3	3	5	3	7	5	4	5	3	7	4	32	6	2	5	2	1	1.875	3.555555556	3.111111111	3.875	3.9	4.545454545
R_00VGakVwRF9XxUF	3	Blair	2	0	5	3	5	3	5	3	6	5	5	5	5	5	4	32	6	2	5	2	1	1.875	3.555555556	3.111111111	3.875	3.9	4.727272727
R_00VGakVwRF9XxUF	3	C.J.	2	0	3	2	4	5	3	2	6	5	2	6	5	5	4	32	6	2	5	2	1	1.875	3.555555556	3.111111111	3.875	3.9	3.909090909
R_00VGakVwRF9XxUF	3	Cameron	3	0	2	2	3	3	5	3	3	3	1	3	4	5	4	32	6	2	5	2	1	1.875	3.555555556	3.111111111	3.875	3.9	3.090909091
R_00VGakVwRF9XxUF	3	Chris	0	3	5	4	5	3	5	2	6	6	5	6	5	1	4	32	6	2	5	2	1	1.875	3.555555556	3.111111111	3.875	3.9	4.545454545
R_00VGakVwRF9XxUF	3	Jamie	0	3	4	3	5	3	5	5	5	4	4	5	5	5	4	32	6	2	5	2	1	1.875	3.555555556	3.111111111	3.875	3.9	4.545454545
R_00VGakVwRF9XxUF	3	Jessie	2	0	3	3	6	2	6	6	6	5	5	5	5	5	4	32	6	2	5	2	1	1.875	3.555555556	3.111111111	3.875	3.9	5
R_00VGakVwRF9XxUF	3	Jordan	0	3	6	5	6	5	3	5	7	7	6	7	6	7	4	32	6	2	5	2	1	1.875	3.555555556	3.111111111	3.875	3.9	5.909090909
R_00VGakVwRF9XxUF	3	Pat	0	0	5	5	5	3	5	3	6	6	6	6	6	6	4	32	6	2	5	2	1	1.875	3.555555556	3.111111111	3.875	3.9	5.363636364
R_00VGakVwRF9XxUF	3	Sam	0	0	5	3	4	3	5	3	6	6	6	6	6	6	4	32	6	2	5	2	1	1.875	3.555555556	3.111111111	3.875	3.9	5.090909091
R_00VGakVwRF9XxUF	3	Taylor	0	4	3	3	3	3	5	3	4	4	3	5	4	5	4	32	6	2	5	2	1	1.875	3.555555556	3.111111111	3.875	3.9	3.818181818
R_01j4fe2oeWjE27H	2	Adrian	3	0	3	1	3	4	4	4	5	5	4	5	5	4	4	45	4	2.75	4	1	1	2.375	4	5	1.875	1.8	3.909090909
R_01j4fe2oeWjE27H	2	Alex	3	0	2	1	2	4	4	4	3	4	4	4	4	4	4	45	4	2.75	4	1	1	2.375	4	5	1.875	1.8	3.272727273
R_01j4fe2oeWjE27H	2	Blair	0	3	2	1	4	4	4	4	6	3	3	4	4	4	4	45	4	2.75	4	1	1	2.375	4	5	1.875	1.8	3.545454545
R_01j4fe2oeWjE27H	2	C.J.	0	4	1	1	2	4	4	4	4	4	4	4	4	4	4	45	4	2.75	4	1	1	2.375	4	5	1.875	1.8	3.272727273
R_01j4fe2oeWjE27H	2	Cameron	0	2	6	5	5	4	4	4	5	4	5	5	5	5	4	45	4	2.75	4	1	1	2.375	4	5	1.875	1.8	4.818181818
R_01j4fe2oeWjE27H	2	Chris	0	0	3	1	4	4	4	4	5	4	4	4	4	4	4	45	4	2.75	4	1	1	2.375	4	5	1.875	1.8	3.727272727
R_01j4fe2oeWjE27H	2	Jamie	0	0	4	4	4	4	4	4	4	4	4	4	4	4	4	45	4	2.75	4	1	1	2.375	4	5	1.875	1.8	4
R_01j4fe2oeWjE27H	2	Jessie	0	3	5	3	6	4	4	4	6	5	5	5	5	6	4	45	4	2.75	4	1	1	2.375	4	5	1.875	1.8	4.909090909
R_01j4fe2oeWjE27H	2	Jordan	0	0	4	3	4	4	4	4	5	4	4	4	4	4	4	45	4	2.75	4	1	1	2.375	4	5	1.875	1.8	4
R_01j4fe2oeWjE27H	2	Pat	2	0	4	1	3	4	4	4	5	4	4	4	4	4	4	45	4	2.75	4	1	1	2.375	4	5	1.875	1.8	3.727272727
R_01j4fe2oeWjE27H	2	Sam	2	0	4	1	4	4	4	4	6	4	4	4	4	4	4	45	4	2.75	4	1	1	2.375	4	5	1.875	1.8	3.909090909
R_01j4fe2oeWjE27H	2	Taylor	0	0	2	1	4	6	2	4	4	4	4	4	4	4	4	45	4	2.75	4	1	1	2.375	4	5	1.875	1.8	3.363636364
R_0Dioy7qQQmiKSCp	2	Adrian	3	0	7	7	6	2	6	2	7	6	7	6	7	7	2	27	7	5	3		2	1.5	3.777777778	3.666666667	2.125	3.7	6.181818182
R_0Dioy7qQQmiKSCp	2	Alex	3	0	1	1	4	6	2	1	7	2	4	1	2	3	2	27	7	5	3		2	1.5	3.777777778	3.666666667	2.125	3.7	2.545454545
R_0Dioy7qQQmiKSCp	2	Blair	0	3	2	3	3	5	3	2	6	4	3	5	4	5	2	27	7	5	3		2	1.5	3.777777778	3.666666667	2.125	3.7	3.636363636
R_0Dioy7qQQmiKSCp	2	C.J.	0	4	3	2	2	3	5	1	5	1	1	5	4	5	2	27	7	5	3		2	1.5	3.777777778	3.666666667	2.125	3.7	3.090909091
R_0Dioy7qQQmiKSCp	2	Cameron	0	2	5	6	6	2	6	3	6	6	7	7	6	7	2	27	7	5	3		2	1.5	3.777777778	3.666666667	2.125	3.7	5.909090909
R_0Dioy7qQQmiKSCp	2	Chris	0	0	6	2	2	5	3	2	5	4	3	5	2	3	2	27	7	5	3		2	1.5	3.777777778	3.666666667	2.125	3.7	3.363636364
R_0Dioy7qQQmiKSCp	2	Jamie	0	0	4	2	4	5	3	3	5	4	4	5	3	3	2	27	7	5	3		2	1.5	3.777777778	3.666666667	2.125	3.7	3.636363636
R_0Dioy7qQQmiKSCp	2	Jessie	0	3	7	6	6	2	6	5	6	6	7	7	6	7	2	27	7	5	3		2	1.5	3.777777778	3.666666667	2.125	3.7	6.272727273
R_0Dioy7qQQmiKSCp	2	Jordan	0	0	6	5	5	2	6	5	7	6	7	7	6	6	2	27	7	5	3		2	1.5	3.777777778	3.666666667	2.125	3.7	6
R_0Dioy7qQQmiKSCp	2	Pat	2	0	5	3	6	2	6	5	5	6	6	6	6	6	2	27	7	5	3		2	1.5	3.777777778	3.666666667	2.125	3.7	5.454545455
R_0Dioy7qQQmiKSCp	2	Sam	2	0	5	3	4	3	5	5	5	5	6	6	7	7	2	27	7	5	3		2	1.5	3.777777778	3.666666667	2.125	3.7	5.272727273
R_0Dioy7qQQmiKSCp	2	Taylor	0	0	6	7	7	1	7	4	5	7	7	4	6	7	2	27	7	5	3		2	1.5	3.777777778	3.666666667	2.125	3.7	6.090909091
R_0rGfGwXc3Geps8t	1	Adrian	0	2	2	2	3	3	5	3	5	4	3	5	4	3	5	33	7	2.25	7			2.375	3	4.777777778	1.875	3.6	3.545454545
R_0rGfGwXc3Geps8t	1	Alex	0	3	2	2	3	5	3	2	4	2	2	3	3	4	5	33	7	2.25	7			2.375	3	4.777777778	1.875	3.6	2.727272727
R_0rGfGwXc3Geps8t	1	Blair	0	0	4	2	4	3	5	3	5	4	2	5	4	5	5	33	7	2.25	7			2.375	3	4.777777778	1.875	3.6	3.909090909
R_0rGfGwXc3Geps8t	1	C.J.	0	0	3	2	3	3	5	3	5	3	1	5	3	4	5	33	7	2.25	7			2.375	3	4.777777778	1.875	3.6	3.363636364
R_0rGfGwXc3Geps8t	1	Cameron	0	0	5	5	6	3	5	3	5	6	6	5	4	5	5	33	7	2.25	7			2.375	3	4.777777778	1.875	3.6	5
R_0rGfGwXc3Geps8t	1	Chris	2	0	3	2	3	4	4	2	6	5	4	5	5	2	5	33	7	2.25	7			2.375	3	4.777777778	1.875	3.6	3.727272727
R_0rGfGwXc3Geps8t	1	Jamie	2	0	3	2	3	3	5	3	5	4	4	5	4	4	5	33	7	2.25	7			2.375	3	4.777777778	1.875	3.6	3.818181818
R_0rGfGwXc3Geps8t	1	Jessie	0	0	6	5	6	3	5	3	5	6	6	5	5	5	5	33	7	2.25	7			2.375	3	4.777777778	1.875	3.6	5.181818182
R_0rGfGwXc3Geps8t	1	Jordan	3	0	1	2	2	5	3	3	5	3	2	5	3	1	5	33	7	2.25	7			2.375	3	4.777777778	1.875	3.6	2.727272727
R_0rGfGwXc3Geps8t	1	Pat	0	2	2	2	2	5	3	2	5	4	3	5	4	2	5	33	7	2.25	7			2.375	3	4.777777778	1.875	3.6	3.090909091
R_0rGfGwXc3Geps8t	1	Sam	1	4	3	2	5	5	3	3	5	5	4	5	4	3	5	33	7	2.25	7			2.375	3	4.777777778	1.875	3.6	3.818181818
R_0rGfGwXc3Geps8t	1	Taylor	4	0	3	3	4	3	5	3	3	5	5	5	4	2	5	33	7	2.25	7			2.375	3	4.777777778	1.875	3.6	3.818181818
R_0Ter8PFgxCWYoTz	2	Adrian	3	0	6	5	7	1	7	4	7	7	7	7	7	7	4	25	2	3.5	6	2	1	2.75	3.666666667	5	2.25	4.6	6.454545455
R_0Ter8PFgxCWYoTz	2	Alex	3	0	4	2	3	6	2	2	6	6	4	6	4	3	4	25	2	3.5	6	2	1	2.75	3.666666667	5	2.25	4.6	3.818181818
R_0Ter8PFgxCWYoTz	2	Blair	0	3	7	7	7	1	7	4	7	7	7	7	7	7	4	25	2	3.5	6	2	1	2.75	3.666666667	5	2.25	4.6	6.727272727
R_0Ter8PFgxCWYoTz	2	C.J.	0	4	5	6	3	1	7	1	6	6	3	6	7	6	4	25	2	3.5	6	2	1	2.75	3.666666667	5	2.25	4.6	5.090909091
R_0Ter8PFgxCWYoTz	2	Cameron	0	2	7	7	7	1	7	4	7	7	7	7	7	7	4	25	2	3.5	6	2	1	2.75	3.666666667	5	2.25	4.6	6.727272727
R_0Ter8PFgxCWYoTz	2	Chris	0	0	3	4	5	1	7	3	7	7	6	5	7	5	4	25	2	3.5	6	2	1	2.75	3.666666667	5	2.25	4.6	5.363636364
R_0Ter8PFgxCWYoTz	2	Jamie	0	0	7	6	7	1	7	6	7	7	7	7	7	7	4	25	2	3.5	6	2	1	2.75	3.666666667	5	2.25	4.6	6.818181818
R_0Ter8PFgxCWYoTz	2	Jessie	0	3	6	7	7	1	7	5	7	5	7	6	7	7	4	25	2	3.5	6	2	1	2.75	3.666666667	5	2.25	4.6	6.454545455
R_0Ter8PFgxCWYoTz	2	Jordan	0	0	6	5	7	1	7	4	7	5	7	7	7	7	4	25	2	3.5	6	2	1	2.75	3.666666667	5	2.25	4.6	6.272727273
R_0Ter8PFgxCWYoTz	2	Pat	2	0	6	6	6	2	6	4	7	7	7	7	7	7	4	25	2	3.5	6	2	1	2.75	3.666666667	5	2.25	4.6	6.363636364
R_0Ter8PFgxCWYoTz	2	Sam	2	0	5	2	7	1	7	1	7	7	6	7	4	5	4	25	2	3.5	6	2	1	2.75	3.666666667	5	2.25	4.6	5.272727273
R_0Ter8PFgxCWYoTz	2	Taylor	0	0	7	7	7	1	7	6	7	7	7	7	7	7	4	25	2	3.5	6	2	1	2.75	3.666666667	5	2.25	4.6	6.909090909
R_0vUkFEqxqldXS7P	2	Adrian	3	0	4	3	5	4	4	4	5	5	5	5	5	6	4	42	6	5	6	3	1	3.25	4.333333333	4	1.5	4.4	4.636363636
R_0vUkFEqxqldXS7P	2	Alex	3	0	3	2	2	6	2	2	4	3	2	3	4	2	4	42	6	5	6	3	1	3.25	4.333333333	4	1.5	4.4	2.636363636
R_0vUkFEqxqldXS7P	2	Blair	0	3	4	4	3	4	4	4	5	3	2	5	4	5	4	42	6	5	6	3	1	3.25	4.333333333	4	1.5	4.4	3.909090909
R_0vUkFEqxqldXS7P	2	C.J.	0	4	5	4	4	5	3	5	6	5	4	5	4	3	4	42	6	5	6	3	1	3.25	4.333333333	4	1.5	4.4	4.363636364
R_0vUkFEqxqldXS7P	2	Cameron	0	2	4	4	5	3	5	4	5	5	5	5	5	6	4	42	6	5	6	3	1	3.25	4.333333333	4	1.5	4.4	4.818181818
R_0vUkFEqxqldXS7P	2	Chris	0	0	2	2	3	6	2	2	4	3	2	3	4	2	4	42	6	5	6	3	1	3.25	4.333333333	4	1.5	4.4	2.636363636
R_0vUkFEqxqldXS7P	2	Jamie	0	0	5	5	5	4	4	4	5	5	5	5	5	5	4	42	6	5	6	3	1	3.25	4.333333333	4	1.5	4.4	4.818181818
R_0vUkFEqxqldXS7P	2	Jessie	0	3	3	3	5	3	5	5	4	4	2	4	4	6	4	42	6	5	6	3	1	3.25	4.333333333	4	1.5	4.4	4.090909091
R_0vUkFEqxqldXS7P	2	Jordan	0	0	5	5	6	3	5	5	6	6	6	6	6	6	4	42	6	5	6	3	1	3.25	4.333333333	4	1.5	4.4	5.636363636
R_0vUkFEqxqldXS7P	2	Pat	2	0	5	4	4	3	5	3	6	5	6	6	5	4	4	42	6	5	6	3	1	3.25	4.333333333	4	1.5	4.4	4.818181818
R_0vUkFEqxqldXS7P	2	Sam	2	0	3	4	3	4	4	3	3	3	2	3	4	2	4	42	6	5	6	3	1	3.25	4.333333333	4	1.5	4.4	3.090909091
R_0vUkFEqxqldXS7P	2	Taylor	0	0	3	2	5	2	6	6	3	4	6	3	5	6	4	42	6	5	6	3	1	3.25	4.333333333	4	1.5	4.4	4.454545455
R_1Bs2Oci9QTfkiwt	1	Adrian	0	2	6	6	6	2	6	5	7	7	7	6	7	6	4	42	5	6.25	7	4	1	4.25	3.444444444	4.666666667	1.125	3.7	6.272727273
R_1Bs2Oci9QTfkiwt	1	Alex	0	3	4	4	5	3	5	4	5	4	4	5	4	3	4	42	5	6.25	7	4	1	4.25	3.444444444	4.666666667	1.125	3.7	4.272727273
R_1Bs2Oci9QTfkiwt	1	Blair	0	0	3	2	2	7	1	2	5	3	2	4	3	3	4	42	5	6.25	7	4	1	4.25	3.444444444	4.666666667	1.125	3.7	2.727272727
R_1Bs2Oci9QTfkiwt	1	C.J.	0	0	5	4	5	4	4	3	6	6	4	5	6	6	4	42	5	6.25	7	4	1	4.25	3.444444444	4.666666667	1.125	3.7	4.909090909
R_1Bs2Oci9QTfkiwt	1	Cameron	0	0	4	4	5	2	6	5	4	5	4	4	4	6	4	42	5	6.25	7	4	1	4.25	3.444444444	4.666666667	1.125	3.7	4.636363636
R_1Bs2Oci9QTfkiwt	1	Chris	2	0	4	2	3	5	3	1	5	5	4	5	5	2	4	42	5	6.25	7	4	1	4.25	3.444444444	4.666666667	1.125	3.7	3.545454545
R_1Bs2Oci9QTfkiwt	1	Jamie	2	0	5	4	4	4	4	3	5	6	6	6	5	4	4	42	5	6.25	7	4	1	4.25	3.444444444	4.666666667	1.125	3.7	4.727272727
R_1Bs2Oci9QTfkiwt	1	Jessie	0	0	6	3	5	2	6	4	6	6	4	6	5	6	4	42	5	6.25	7	4	1	4.25	3.444444444	4.666666667	1.125	3.7	5.181818182
R_1Bs2Oci9QTfkiwt	1	Jordan	3	0	3	2	2	7	1	2	5	4	3	3	4	1	4	42	5	6.25	7	4	1	4.25	3.444444444	4.666666667	1.125	3.7	2.727272727
R_1Bs2Oci9QTfkiwt	1	Pat	0	2	5	5	4	4	4	4	6	6	5	5	5	3	4	42	5	6.25	7	4	1	4.25	3.444444444	4.666666667	1.125	3.7	4.727272727
R_1Bs2Oci9QTfkiwt	1	Sam	1	4	3	1	3	6	2	2	4	3	3	4	3	2	4	42	5	6.25	7	4	1	4.25	3.444444444	4.666666667	1.125	3.7	2.727272727
R_1Bs2Oci9QTfkiwt	1	Taylor	4	0	6	5	5	2	6	4	7	6	6	5	6	3	4	42	5	6.25	7	4	1	4.25	3.444444444	4.666666667	1.125	3.7	5.363636364
R_1HV2VDTiS7LvnSd	3	Adrian	0	0	3	3	6	3	5	3	5	6	3	5	6	6	1	37	5	3.75	6	3	1	3.375	3.333333333	4.333333333	2.875	4.2	4.636363636
R_1HV2VDTiS7LvnSd	3	Alex	0	0	2	2	1	6	2	2	5	2	1	3	2	1	1	37	5	3.75	6	3	1	3.375	3.333333333	4.333333333	2.875	4.2	2.090909091
R_1HV2VDTiS7LvnSd	3	Blair	2	0	2	2	1	5	3	3	5	1	1	2	2	3	1	37	5	3.75	6	3	1	3.375	3.333333333	4.333333333	2.875	4.2	2.272727273
R_1HV2VDTiS7LvnSd	3	C.J.	2	0	1	1	1	6	2	2	3	1	1	2	3	2	1	37	5	3.75	6	3	1	3.375	3.333333333	4.333333333	2.875	4.2	1.727272727
R_1HV2VDTiS7LvnSd	3	Cameron	3	0	6	6	7	3	5	3	5	6	6	6	7	6	1	37	5	3.75	6	3	1	3.375	3.333333333	4.333333333	2.875	4.2	5.727272727
R_1HV2VDTiS7LvnSd	3	Chris	0	3	2	2	3	6	2	2	3	3	2	3	2	1	1	37	5	3.75	6	3	1	3.375	3.333333333	4.333333333	2.875	4.2	2.272727273
R_1HV2VDTiS7LvnSd	3	Jamie	0	3	5	3	3	5	3	3	6	4	3	5	5	3	1	37	5	3.75	6	3	1	3.375	3.333333333	4.333333333	2.875	4.2	3.909090909
R_1HV2VDTiS7LvnSd	3	Jessie	2	0	5	5	6	3	5	3	5	6	5	5	5	6	1	37	5	3.75	6	3	1	3.375	3.333333333	4.333333333	2.875	4.2	5.090909091
R_1HV2VDTiS7LvnSd	3	Jordan	0	3	2	2	1	5	3	3	3	2	2	1	4	5	1	37	5	3.75	6	3	1	3.375	3.333333333	4.333333333	2.875	4.2	2.545454545
R_1HV2VDTiS7LvnSd	3	Pat	0	0	3	3	5	5	3	3	3	3	3	4	4	6	1	37	5	3.75	6	3	1	3.375	3.333333333	4.333333333	2.875	4.2	3.636363636
R_1HV2VDTiS7LvnSd	3	Sam	0	0	3	3	5	3	5	3	5	6	5	5	3	3	1	37	5	3.75	6	3	1	3.375	3.333333333	4.333333333	2.875	4.2	4.181818182
R_1HV2VDTiS7LvnSd	3	Taylor	0	4	3	3	5	3	5	3	5	6	3	5	5	5	1	37	5	3.75	6	3	1	3.375	3.333333333	4.333333333	2.875	4.2	4.363636364
R_1HxaF5oUIgBW2r3	1	Adrian	0	2	5	1	5	1	7	4	5	5	5	5	5	7	4	44	6	4.5	7	4	1	3.5	4.333333333	5	1.5	4.9	4.909090909
R_1HxaF5oUIgBW2r3	1	Alex	0	3	1	1	1	4	4	1	1	1	1	1	1	1	4	44	6	4.5	7	4	1	3.5	4.333333333	5	1.5	4.9	1.272727273
R_1HxaF5oUIgBW2r3	1	Blair	0	0	1	1	1	4	4	1	1	1	1	1	1	1	4	44	6	4.5	7	4	1	3.5	4.333333333	5	1.5	4.9	1.272727273
R_1HxaF5oUIgBW2r3	1	C.J.	0	0	1	1	1	7	1	1	1	1	1	1	1	1	4	44	6	4.5	7	4	1	3.5	4.333333333	5	1.5	4.9	1
R_1HxaF5oUIgBW2r3	1	Cameron	0	0	7	7	7	1	7	7	7	7	7	7	7	7	4	44	6	4.5	7	4	1	3.5	4.333333333	5	1.5	4.9	7
R_1HxaF5oUIgBW2r3	1	Chris	2	0	5	5	5	1	7	1	3	4	1	1	1	1	4	44	6	4.5	7	4	1	3.5	4.333333333	5	1.5	4.9	3.090909091
R_1HxaF5oUIgBW2r3	1	Jamie	2	0	1	1	1	1	7	1	1	1	1	1	1	1	4	44	6	4.5	7	4	1	3.5	4.333333333	5	1.5	4.9	1.545454545
R_1HxaF5oUIgBW2r3	1	Jessie	0	0	1	1	7	1	7	4	1	1	1	1	1	6	4	44	6	4.5	7	4	1	3.5	4.333333333	5	1.5	4.9	2.818181818
R_1HxaF5oUIgBW2r3	1	Jordan	3	0	7	7	7	1	7	7	7	7	7	7	7	7	4	44	6	4.5	7	4	1	3.5	4.333333333	5	1.5	4.9	7
R_1HxaF5oUIgBW2r3	1	Pat	0	2	1	1	7	1	7	4	5	5	1	1	5	5	4	44	6	4.5	7	4	1	3.5	4.333333333	5	1.5	4.9	3.818181818
R_1HxaF5oUIgBW2r3	1	Sam	1	4	4	1	1	7	1	1	7	7	4	5	1	1	4	44	6	4.5	7	4	1	3.5	4.333333333	5	1.5	4.9	3
R_1HxaF5oUIgBW2r3	1	Taylor	4	0	5	5	5	1	7	7	5	5	1	4	5	5	4	44	6	4.5	7	4	1	3.5	4.333333333	5	1.5	4.9	4.909090909
R_1St7Y7wsrSaUMXH	3	Adrian	0	0	6	4	5	3	5	5	5	5	6	5	5	6	4	28	4	5.75	6	2	1	3.125	4.555555556	3.444444444	3.375	3.9	5.181818182
R_1St7Y7wsrSaUMXH	3	Alex	0	0	5	4	4	3	5	3	5	4	4	5	4	5	4	28	4	5.75	6	2	1	3.125	4.555555556	3.444444444	3.375	3.9	4.363636364
R_1St7Y7wsrSaUMXH	3	Blair	2	0	4	4	3	4	4	3	5	4	4	5	4	4	4	28	4	5.75	6	2	1	3.125	4.555555556	3.444444444	3.375	3.9	4
R_1St7Y7wsrSaUMXH	3	C.J.	2	0	4	4	4	3	5	3	5	4	4	5	4	2	4	28	4	5.75	6	2	1	3.125	4.555555556	3.444444444	3.375	3.9	4
R_1St7Y7wsrSaUMXH	3	Cameron	3	0	5	4	4	3	5	3	5	5	4	5	4	3	4	28	4	5.75	6	2	1	3.125	4.555555556	3.444444444	3.375	3.9	4.272727273
R_1St7Y7wsrSaUMXH	3	Chris	0	3	4	4	5	3	5	4	5	4	4	5	5	5	4	28	4	5.75	6	2	1	3.125	4.555555556	3.444444444	3.375	3.9	4.545454545
R_1St7Y7wsrSaUMXH	3	Jamie	0	3	4	4	4	3	5	3	5	5	5	5	5	4	4	28	4	5.75	6	2	1	3.125	4.555555556	3.444444444	3.375	3.9	4.454545455
R_1St7Y7wsrSaUMXH	3	Jessie	2	0	4	4	3	3	5	3	4	4	4	5	4	5	4	28	4	5.75	6	2	1	3.125	4.555555556	3.444444444	3.375	3.9	4.090909091
R_1St7Y7wsrSaUMXH	3	Jordan	0	3	5	5	5	3	5	4	5	5	5	5	5	5	4	28	4	5.75	6	2	1	3.125	4.555555556	3.444444444	3.375	3.9	4.909090909
R_1St7Y7wsrSaUMXH	3	Pat	0	0	5	4	5	3	5	3	6	5	5	6	4	6	4	28	4	5.75	6	2	1	3.125	4.555555556	3.444444444	3.375	3.9	4.909090909
R_1St7Y7wsrSaUMXH	3	Sam	0	0	5	4	4	4	4	5	6	6	5	5	5	5	4	28	4	5.75	6	2	1	3.125	4.555555556	3.444444444	3.375	3.9	4.909090909
R_1St7Y7wsrSaUMXH	3	Taylor	0	4	5	4	5	3	5	5	6	6	5	5	5	6	4	28	4	5.75	6	2	1	3.125	4.555555556	3.444444444	3.375	3.9	5.181818182
R_1U0x70IgnQBME5L	1	Adrian	0	2	5	4	5	2	6	1	5	5	5	5	5	5	4	33	6	6.25	7			4	4	4	2	3.8	4.636363636
R_1U0x70IgnQBME5L	1	Alex	0	3	1	1	1	5	3	1	1	1	1	1	1	1	4	33	6	6.25	7			4	4	4	2	3.8	1.181818182
R_1U0x70IgnQBME5L	1	Blair	0	0	2	2	2	5	3	2	2	2	2	2	2	2	4	33	6	6.25	7			4	4	4	2	3.8	2.090909091
R_1U0x70IgnQBME5L	1	C.J.	0	0	1	1	1	5	3	1	1	1	1	1	1	1	4	33	6	6.25	7			4	4	4	2	3.8	1.181818182
R_1U0x70IgnQBME5L	1	Cameron	0	0	1	1	1	7	1	1	5	1	1	1	1	1	4	33	6	6.25	7			4	4	4	2	3.8	1.363636364
R_1U0x70IgnQBME5L	1	Chris	2	0	1	1	1	7	1	1	1	1	1	1	1	1	4	33	6	6.25	7			4	4	4	2	3.8	1
R_1U0x70IgnQBME5L	1	Jamie	2	0	2	2	2	7	1	2	2	2	2	2	2	2	4	33	6	6.25	7			4	4	4	2	3.8	1.909090909
R_1U0x70IgnQBME5L	1	Jessie	0	0	5	5	5	2	6	2	5	5	5	5	5	5	4	33	6	6.25	7			4	4	4	2	3.8	4.818181818
R_1U0x70IgnQBME5L	1	Jordan	3	0	2	2	2	5	3	2	2	2	2	2	2	2	4	33	6	6.25	7			4	4	4	2	3.8	2.090909091
R_1U0x70IgnQBME5L	1	Pat	0	2	2	1	2	6	2	1	2	2	2	2	2	2	4	33	6	6.25	7			4	4	4	2	3.8	1.818181818
R_1U0x70IgnQBME5L	1	Sam	1	4	2	2	2	6	2	2	2	2	2	2	2	2	4	33	6	6.25	7			4	4	4	2	3.8	2
R_1U0x70IgnQBME5L	1	Taylor	4	0	1	1	5	6	2	2	5	5	5	5	5	2	4	33	6	6.25	7			4	4	4	2	3.8	3.454545455
R_1XrCGkBPOjpKPzf	2	Adrian	3	0	6	5	6	4	4	4	6	6	6	6	6	6	2	23	6	5	5	4	1	2.375	4.222222222	2.333333333	4.125	4.4	5.545454545
R_1XrCGkBPOjpKPzf	2	Alex	3	0	4	4	4	5	3	3	5	3	3	3	4	5	2	23	6	5	5	4	1	2.375	4.222222222	2.333333333	4.125	4.4	3.727272727
R_1XrCGkBPOjpKPzf	2	Blair	0	3	4	4	5	5	3	3	5	5	5	5	4	5	2	23	6	5	5	4	1	2.375	4.222222222	2.333333333	4.125	4.4	4.363636364
R_1XrCGkBPOjpKPzf	2	C.J.	0	4	4	3	2	5	3	3	6	2	3	6	4	5	2	23	6	5	5	4	1	2.375	4.222222222	2.333333333	4.125	4.4	3.727272727
R_1XrCGkBPOjpKPzf	2	Cameron	0	2	6	6	6	3	5	5	5	6	6	6	6	6	2	23	6	5	5	4	1	2.375	4.222222222	2.333333333	4.125	4.4	5.727272727
R_1XrCGkBPOjpKPzf	2	Chris	0	0	4	4	4	5	3	3	5	4	4	5	4	3	2	23	6	5	5	4	1	2.375	4.222222222	2.333333333	4.125	4.4	3.909090909
R_1XrCGkBPOjpKPzf	2	Jamie	0	0	6	5	5	4	4	4	5	5	5	6	4	3	2	23	6	5	5	4	1	2.375	4.222222222	2.333333333	4.125	4.4	4.727272727
R_1XrCGkBPOjpKPzf	2	Jessie	0	3	6	5	6	3	5	3	5	6	5	6	5	5	2	23	6	5	5	4	1	2.375	4.222222222	2.333333333	4.125	4.4	5.181818182
R_1XrCGkBPOjpKPzf	2	Jordan	0	0	6	5	6	4	4	5	6	6	6	6	6	6	2	23	6	5	5	4	1	2.375	4.222222222	2.333333333	4.125	4.4	5.636363636
R_1XrCGkBPOjpKPzf	2	Pat	2	0	5	3	5	6	2	3	6	6	6	6	5	5	2	23	6	5	5	4	1	2.375	4.222222222	2.333333333	4.125	4.4	4.727272727
R_1XrCGkBPOjpKPzf	2	Sam	2	0	5	5	6	5	3	3	5	5	5	5	4	4	2	23	6	5	5	4	1	2.375	4.222222222	2.333333333	4.125	4.4	4.545454545
R_1XrCGkBPOjpKPzf	2	Taylor	0	0	5	5	6	3	5	5	5	6	6	5	6	6	2	23	6	5	5	4	1	2.375	4.222222222	2.333333333	4.125	4.4	5.454545455
R_1zXs4JijncqNELX	1	Adrian	0	2	5	6	6	2	6	2	6	6	4	5	5	5	3	22	3	2.25	6	2	1	3.125	3.555555556	2.777777778	2.625	3.1	5.090909091
R_1zXs4JijncqNELX	1	Alex	0	3	2	1	4	5	3	2	5	2	3	3	3	1	3	22	3	2.25	6	2	1	3.125	3.555555556	2.777777778	2.625	3.1	2.636363636
R_1zXs4JijncqNELX	1	Blair	0	0	5	3	3	4	4	5	5	4	5	2	4	3	3	22	3	2.25	6	2	1	3.125	3.555555556	2.777777778	2.625	3.1	3.909090909
R_1zXs4JijncqNELX	1	C.J.	0	0	1	1	2	5	3	1	5	2	2	3	1	2	3	22	3	2.25	6	2	1	3.125	3.555555556	2.777777778	2.625	3.1	2.090909091
R_1zXs4JijncqNELX	1	Cameron	0	0	6	6	5	2	6	4	4	5	5	4	5	5	3	22	3	2.25	6	2	1	3.125	3.555555556	2.777777778	2.625	3.1	5
R_1zXs4JijncqNELX	1	Chris	2	0	5	2	2	5	3	4	6	3	5	5	3	4	3	22	3	2.25	6	2	1	3.125	3.555555556	2.777777778	2.625	3.1	3.818181818
R_1zXs4JijncqNELX	1	Jamie	2	0	3	3	6	4	4	5	3	2	5	4	4	4	3	22	3	2.25	6	2	1	3.125	3.555555556	2.777777778	2.625	3.1	3.909090909
R_1zXs4JijncqNELX	1	Jessie	0	0	5	5	6	4	4	3	4	3	4	5	4	6	3	22	3	2.25	6	2	1	3.125	3.555555556	2.777777778	2.625	3.1	4.454545455
R_1zXs4JijncqNELX	1	Jordan	3	0	6	3	5	4	4	6	5	6	6	6	6	5	3	22	3	2.25	6	2	1	3.125	3.555555556	2.777777778	2.625	3.1	5.272727273
R_1zXs4JijncqNELX	1	Pat	0	2	5	2	3	4	4	5	4	4	4	5	2	4	3	22	3	2.25	6	2	1	3.125	3.555555556	2.777777778	2.625	3.1	3.818181818
R_1zXs4JijncqNELX	1	Sam	1	4	4	4	3	4	4	2	5	3	6	5	4	3	3	22	3	2.25	6	2	1	3.125	3.555555556	2.777777778	2.625	3.1	3.909090909
R_1zXs4JijncqNELX	1	Taylor	4	0	2	2	2	6	2	2	4	2	3	3	4	1	3	22	3	2.25	6	2	1	3.125	3.555555556	2.777777778	2.625	3.1	2.454545455
R_24b7FXz9C50aE9T	3	Adrian	0	0	5	5	6	2	6	3	6	6	6	6	6	6	2	40	5	3.25	6		2	3.125	4.555555556	4.222222222	2	3.8	5.545454545
R_24b7FXz9C50aE9T	3	Alex	0	0	3	3	5	3	5	5	6	6	5	5	5	5	2	40	5	3.25	6		2	3.125	4.555555556	4.222222222	2	3.8	4.818181818
R_24b7FXz9C50aE9T	3	Blair	2	0	3	3	5	3	5	3	6	6	3	5	5	6	2	40	5	3.25	6		2	3.125	4.555555556	4.222222222	2	3.8	4.545454545
R_24b7FXz9C50aE9T	3	C.J.	2	0	2	2	3	3	5	3	5	5	2	5	6	5	2	40	5	3.25	6		2	3.125	4.555555556	4.222222222	2	3.8	3.909090909
R_24b7FXz9C50aE9T	3	Cameron	3	0	7	7	6	3	5	5	6	7	7	7	7	6	2	40	5	3.25	6		2	3.125	4.555555556	4.222222222	2	3.8	6.363636364
R_24b7FXz9C50aE9T	3	Chris	0	3	5	3	6	3	5	3	6	5	3	5	5	6	2	40	5	3.25	6		2	3.125	4.555555556	4.222222222	2	3.8	4.727272727
R_24b7FXz9C50aE9T	3	Jamie	0	3	2	2	5	3	5	3	5	5	2	5	5	5	2	40	5	3.25	6		2	3.125	4.555555556	4.222222222	2	3.8	4
R_24b7FXz9C50aE9T	3	Jessie	2	0	6	5	6	3	5	5	6	6	6	6	6	6	2	40	5	3.25	6		2	3.125	4.555555556	4.222222222	2	3.8	5.727272727
R_24b7FXz9C50aE9T	3	Jordan	0	3	6	5	6	3	5	3	6	6	6	6	6	6	2	40	5	3.25	6		2	3.125	4.555555556	4.222222222	2	3.8	5.545454545
R_24b7FXz9C50aE9T	3	Pat	0	0	6	6	6	3	5	6	6	6	7	7	7	6	2	40	5	3.25	6		2	3.125	4.555555556	4.222222222	2	3.8	6.181818182
R_24b7FXz9C50aE9T	3	Sam	0	0	6	5	6	3	5	3	6	6	6	6	6	6	2	40	5	3.25	6		2	3.125	4.555555556	4.222222222	2	3.8	5.545454545
R_24b7FXz9C50aE9T	3	Taylor	0	4	6	6	6	3	5	5	6	6	6	6	6	6	2	40	5	3.25	6		2	3.125	4.555555556	4.222222222	2	3.8	5.818181818
R_2ivHWLq5kJcRvUh	2	Adrian	3	0	4	3	3	5	3	3	6	5	5	5	5	3	4	41	6	1.25	6	2	1	3	4	2.888888889	3.625	3	4.090909091
R_2ivHWLq5kJcRvUh	2	Alex	3	0	4	4	3	5	3	3	5	5	4	5	5	3	4	41	6	1.25	6	2	1	3	4	2.888888889	3.625	3	4
R_2ivHWLq5kJcRvUh	2	Blair	0	3	4	4	4	4	4	3	5	5	5	5	4	5	4	41	6	1.25	6	2	1	3	4	2.888888889	3.625	3	4.363636364
R_2ivHWLq5kJcRvUh	2	C.J.	0	4	4	3	3	5	3	3	6	2	3	5	4	4	4	41	6	1.25	6	2	1	3	4	2.888888889	3.625	3	3.636363636
R_2ivHWLq5kJcRvUh	2	Cameron	0	2	4	3	4	3	5	4	5	5	4	5	5	5	4	41	6	1.25	6	2	1	3	4	2.888888889	3.625	3	4.454545455
R_2ivHWLq5kJcRvUh	2	Chris	0	0	6	4	5	3	5	3	5	5	6	6	6	5	4	41	6	1.25	6	2	1	3	4	2.888888889	3.625	3	5.090909091
R_2ivHWLq5kJcRvUh	2	Jamie	0	0	5	4	3	4	4	3	5	5	5	5	5	6	4	41	6	1.25	6	2	1	3	4	2.888888889	3.625	3	4.545454545
R_2ivHWLq5kJcRvUh	2	Jessie	0	3	3	2	6	2	6	2	6	6	5	6	6	6	4	41	6	1.25	6	2	1	3	4	2.888888889	3.625	3	4.909090909
R_2ivHWLq5kJcRvUh	2	Jordan	0	0	5	3	5	3	5	5	5	6	5	5	5	6	4	41	6	1.25	6	2	1	3	4	2.888888889	3.625	3	5
R_2ivHWLq5kJcRvUh	2	Pat	2	0	4	3	4	4	4	4	5	5	5	5	5	5	4	41	6	1.25	6	2	1	3	4	2.888888889	3.625	3	4.454545455
R_2ivHWLq5kJcRvUh	2	Sam	2	0	5	4	4	4	4	4	5	5	4	5	5	5	4	41	6	1.25	6	2	1	3	4	2.888888889	3.625	3	4.545454545
R_2ivHWLq5kJcRvUh	2	Taylor	0	0	6	6	6	2	6	5	6	6	6	6	6	6	4	41	6	1.25	6	2	1	3	4	2.888888889	3.625	3	5.909090909
R_2lO3ujwuKmwHcz3	2	Adrian	3	0	4	2	5	4	4	4	6	6	5	6	6	5	4	30	3	1	6	2	1	2.125	4.777777778	4.777777778	3	3.6	4.818181818
R_2lO3ujwuKmwHcz3	2	Alex	3	0	1	1	1	2	6	2	7	4	3	4	4	3	4	30	3	1	6	2	1	2.125	4.777777778	4.777777778	3	3.6	3.272727273
R_2lO3ujwuKmwHcz3	2	Blair	0	3	2	1	4	4	4	4	7	5	3	5	5	3	4	30	3	1	6	2	1	2.125	4.777777778	4.777777778	3	3.6	3.909090909
R_2lO3ujwuKmwHcz3	2	C.J.	0	4	2	1	4	4	4	4	7	6	3	5	5	2	4	30	3	1	6	2	1	2.125	4.777777778	4.777777778	3	3.6	3.909090909
R_2lO3ujwuKmwHcz3	2	Cameron	0	2	6	6	5	2	6	4	7	7	7	7	7	7	4	30	3	1	6	2	1	2.125	4.777777778	4.777777778	3	3.6	6.272727273
R_2lO3ujwuKmwHcz3	2	Chris	0	0	5	1	5	2	6	2	7	6	5	5	6	5	4	30	3	1	6	2	1	2.125	4.777777778	4.777777778	3	3.6	4.818181818
R_2lO3ujwuKmwHcz3	2	Jamie	0	0	5	3	5	2	6	4	7	7	6	6	6	7	4	30	3	1	6	2	1	2.125	4.777777778	4.777777778	3	3.6	5.636363636
R_2lO3ujwuKmwHcz3	2	Jessie	0	3	6	5	6	4	4	4	7	7	7	7	7	7	4	30	3	1	6	2	1	2.125	4.777777778	4.777777778	3	3.6	6.090909091
R_2lO3ujwuKmwHcz3	2	Jordan	0	0	4	1	5	2	6	3	7	7	5	6	5	6	4	30	3	1	6	2	1	2.125	4.777777778	4.777777778	3	3.6	5
R_2lO3ujwuKmwHcz3	2	Pat	2	0	4	2	4	2	6	4	7	6	4	6	6	5	4	30	3	1	6	2	1	2.125	4.777777778	4.777777778	3	3.6	4.909090909
R_2lO3ujwuKmwHcz3	2	Sam	2	0	5	4	4	4	4	4	7	6	5	6	6	5	4	30	3	1	6	2	1	2.125	4.777777778	4.777777778	3	3.6	5.090909091
R_2lO3ujwuKmwHcz3	2	Taylor	0	0	7	7	6	2	6	5	6	6	7	7	7	7	4	30	3	1	6	2	1	2.125	4.777777778	4.777777778	3	3.6	6.454545455
R_38JgfgJ9skBVSbb	1	Adrian	0	2	6	5	5	2	6	3	5	5	6	5	5	6	4	42	7	6	7	3	1	3.375	4.333333333	4.888888889	1.25	4.4	5.181818182
R_38JgfgJ9skBVSbb	1	Alex	0	3	1	4	4	5	3	1	5	3	1	3	3	5	4	42	7	6	7	3	1	3.375	4.333333333	4.888888889	1.25	4.4	3
R_38JgfgJ9skBVSbb	1	Blair	0	0	3	4	5	3	5	2	6	3	3	5	3	6	4	42	7	6	7	3	1	3.375	4.333333333	4.888888889	1.25	4.4	4.090909091
R_38JgfgJ9skBVSbb	1	C.J.	0	0	3	5	5	5	3	1	6	3	1	5	5	6	4	42	7	6	7	3	1	3.375	4.333333333	4.888888889	1.25	4.4	3.909090909
R_38JgfgJ9skBVSbb	1	Cameron	0	0	7	5	6	1	7	6	6	6	7	6	6	7	4	42	7	6	7	3	1	3.375	4.333333333	4.888888889	1.25	4.4	6.272727273
R_38JgfgJ9skBVSbb	1	Chris	2	0	5	5	5	2	6	5	5	5	5	5	5	3	4	42	7	6	7	3	1	3.375	4.333333333	4.888888889	1.25	4.4	4.909090909
R_38JgfgJ9skBVSbb	1	Jamie	2	0	3	5	5	5	3	1	5	5	1	5	5	2	4	42	7	6	7	3	1	3.375	4.333333333	4.888888889	1.25	4.4	3.636363636
R_38JgfgJ9skBVSbb	1	Jessie	0	0	7	5	7	1	7	6	6	7	7	6	6	6	4	42	7	6	7	3	1	3.375	4.333333333	4.888888889	1.25	4.4	6.363636364
R_38JgfgJ9skBVSbb	1	Jordan	3	0	5	5	5	6	2	2	5	5	3	5	5	1	4	42	7	6	7	3	1	3.375	4.333333333	4.888888889	1.25	4.4	3.909090909
R_38JgfgJ9skBVSbb	1	Pat	0	2	6	5	5	1	7	5	5	7	6	6	6	6	4	42	7	6	7	3	1	3.375	4.333333333	4.888888889	1.25	4.4	5.818181818
R_38JgfgJ9skBVSbb	1	Sam	1	4	6	5	5	5	3	3	5	6	5	5	5	6	4	42	7	6	7	3	1	3.375	4.333333333	4.888888889	1.25	4.4	4.909090909
R_38JgfgJ9skBVSbb	1	Taylor	4	0	7	5	7	1	7	5	6	6	7	6	6	4	4	42	7	6	7	3	1	3.375	4.333333333	4.888888889	1.25	4.4	6
R_3HIhkgP9Z0XLVlz	3	Adrian	0	0	5	2	2	5	3	2	5	7	6	5	5	3	2	33	6	5.75	6			4.25	3.666666667	4.222222222	3.125	4.9	4.090909091
R_3HIhkgP9Z0XLVlz	3	Alex	0	0	4	3	2	5	3	2	5	4	4	3	4	4	2	33	6	5.75	6			4.25	3.666666667	4.222222222	3.125	4.9	3.454545455
R_3HIhkgP9Z0XLVlz	3	Blair	2	0	6	6	6	2	6	2	7	5	6	6	5	5	2	33	6	5.75	6			4.25	3.666666667	4.222222222	3.125	4.9	5.454545455
R_3HIhkgP9Z0XLVlz	3	C.J.	2	0	6	3	3	2	6	2	6	3	4	6	5	4	2	33	6	5.75	6			4.25	3.666666667	4.222222222	3.125	4.9	4.363636364
R_3HIhkgP9Z0XLVlz	3	Cameron	3	0	2	2	3	5	3	2	5	4	4	5	5	2	2	33	6	5.75	6			4.25	3.666666667	4.222222222	3.125	4.9	3.363636364
R_3HIhkgP9Z0XLVlz	3	Chris	0	3	3	2	2	6	2	2	5	5	4	5	4	2	2	33	6	5.75	6			4.25	3.666666667	4.222222222	3.125	4.9	3.272727273
R_3HIhkgP9Z0XLVlz	3	Jamie	0	3	6	2	2	7	1	1	6	5	5	6	5	6	2	33	6	5.75	6			4.25	3.666666667	4.222222222	3.125	4.9	4.090909091
R_3HIhkgP9Z0XLVlz	3	Jessie	2	0	5	2	2	7	1	1	5	5	5	6	5	1	2	33	6	5.75	6			4.25	3.666666667	4.222222222	3.125	4.9	3.454545455
R_3HIhkgP9Z0XLVlz	3	Jordan	0	3	2	2	2	7	1	1	5	3	3	4	4	1	2	33	6	5.75	6			4.25	3.666666667	4.222222222	3.125	4.9	2.545454545
R_3HIhkgP9Z0XLVlz	3	Pat	0	0	6	3	5	2	6	2	6	6	5	6	5	6	2	33	6	5.75	6			4.25	3.666666667	4.222222222	3.125	4.9	5.090909091
R_3HIhkgP9Z0XLVlz	3	Sam	0	0	7	6	6	1	7	4	6	7	6	6	6	6	2	33	6	5.75	6			4.25	3.666666667	4.222222222	3.125	4.9	6.090909091
R_3HIhkgP9Z0XLVlz	3	Taylor	0	4	3	3	2	5	3	2	2	4	2	2	4	1	2	33	6	5.75	6			4.25	3.666666667	4.222222222	3.125	4.9	2.545454545
R_3ql6WO4EOQ5yaQl	1	Adrian	0	2	5	4	4	3	5	4	5	5	4	5	4	5	3	27	5	4	6	2	1	3	4	3.555555556	2.75	3.9	4.545454545
R_3ql6WO4EOQ5yaQl	1	Alex	0	3	5	5	5	3	5	5	5	4	5	5	4	5	3	27	5	4	6	2	1	3	4	3.555555556	2.75	3.9	4.818181818
R_3ql6WO4EOQ5yaQl	1	Blair	0	0	4	4	4	3	5	4	5	4	4	5	4	5	3	27	5	4	6	2	1	3	4	3.555555556	2.75	3.9	4.363636364
R_3ql6WO4EOQ5yaQl	1	C.J.	0	0	3	3	3	3	5	4	5	3	3	5	4	3	3	27	5	4	6	2	1	3	4	3.555555556	2.75	3.9	3.727272727
R_3ql6WO4EOQ5yaQl	1	Cameron	0	0	5	5	5	5	3	5	5	5	5	5	5	5	3	27	5	4	6	2	1	3	4	3.555555556	2.75	3.9	4.818181818
R_3ql6WO4EOQ5yaQl	1	Chris	2	0	3	3	3	5	3	5	5	5	5	5	6	3	3	27	5	4	6	2	1	3	4	3.555555556	2.75	3.9	4.181818182
R_3ql6WO4EOQ5yaQl	1	Jamie	2	0	4	4	5	4	4	4	5	5	5	5	5	5	3	27	5	4	6	2	1	3	4	3.555555556	2.75	3.9	4.636363636
R_3ql6WO4EOQ5yaQl	1	Jessie	0	0	4	5	5	3	5	4	5	5	5	5	5	5	3	27	5	4	6	2	1	3	4	3.555555556	2.75	3.9	4.818181818
R_3ql6WO4EOQ5yaQl	1	Jordan	3	0	5	4	5	3	5	4	5	4	5	5	5	4	3	27	5	4	6	2	1	3	4	3.555555556	2.75	3.9	4.636363636
R_3ql6WO4EOQ5yaQl	1	Pat	0	2	4	4	3	3	5	4	5	5	4	5	5	5	3	27	5	4	6	2	1	3	4	3.555555556	2.75	3.9	4.454545455
R_3ql6WO4EOQ5yaQl	1	Sam	1	4	5	5	5	3	5	4	5	5	5	5	5	5	3	27	5	4	6	2	1	3	4	3.555555556	2.75	3.9	4.909090909
R_3ql6WO4EOQ5yaQl	1	Taylor	4	0	4	5	5	3	5	4	4	5	5	4	4	5	3	27	5	4	6	2	1	3	4	3.555555556	2.75	3.9	4.545454545
R_3UlB6IFtaPw8dal	2	Adrian	3	0	5	3	3	5	3	3	6	6	5	6	6	5	4	31	7	5.5	6	3	1	2.75	3.555555556	3.444444444	3.125	4.3	4.636363636
R_3UlB6IFtaPw8dal	2	Alex	3	0	4	4	4	5	3	3	4	4	3	4	4	3	4	31	7	5.5	6	3	1	2.75	3.555555556	3.444444444	3.125	4.3	3.636363636
R_3UlB6IFtaPw8dal	2	Blair	0	3	3	2	3	6	2	2	5	3	3	4	5	3	4	31	7	5.5	6	3	1	2.75	3.555555556	3.444444444	3.125	4.3	3.181818182
R_3UlB6IFtaPw8dal	2	C.J.	0	4	5	3	3	6	2	2	6	3	5	5	6	2	4	31	7	5.5	6	3	1	2.75	3.555555556	3.444444444	3.125	4.3	3.818181818
R_3UlB6IFtaPw8dal	2	Cameron	0	2	6	6	6	3	5	3	6	6	6	6	6	6	4	31	7	5.5	6	3	1	2.75	3.555555556	3.444444444	3.125	4.3	5.636363636
R_3UlB6IFtaPw8dal	2	Chris	0	0	5	3	5	5	3	3	6	6	5	6	6	5	4	31	7	5.5	6	3	1	2.75	3.555555556	3.444444444	3.125	4.3	4.818181818
R_3UlB6IFtaPw8dal	2	Jamie	0	0	6	5	5	3	5	4	6	6	6	6	6	6	4	31	7	5.5	6	3	1	2.75	3.555555556	3.444444444	3.125	4.3	5.545454545
R_3UlB6IFtaPw8dal	2	Jessie	0	3	6	5	6	5	3	3	6	6	6	6	6	5	4	31	7	5.5	6	3	1	2.75	3.555555556	3.444444444	3.125	4.3	5.272727273
R_3UlB6IFtaPw8dal	2	Jordan	0	0	6	5	5	3	5	3	6	6	6	6	6	6	4	31	7	5.5	6	3	1	2.75	3.555555556	3.444444444	3.125	4.3	5.454545455
R_3UlB6IFtaPw8dal	2	Pat	2	0	5	3	5	5	3	3	5	5	5	5	5	5	4	31	7	5.5	6	3	1	2.75	3.555555556	3.444444444	3.125	4.3	4.454545455
R_3UlB6IFtaPw8dal	2	Sam	2	0	5	3	5	5	3	3	6	6	5	5	6	3	4	31	7	5.5	6	3	1	2.75	3.555555556	3.444444444	3.125	4.3	4.545454545
R_3UlB6IFtaPw8dal	2	Taylor	0	0	6	3	5	4	4	3	6	6	5	6	6	6	4	31	7	5.5	6	3	1	2.75	3.555555556	3.444444444	3.125	4.3	5.090909091
R_3wr9ahE7w5eTLq5	2	Adrian	3	0	6	6	6	5	3	5	6	6	6	6	6	3	2	30	1	1.25	6	3	1	2.75	4	4.666666667	1.125	4	5.363636364
R_3wr9ahE7w5eTLq5	2	Alex	3	0	5	3	5	5	3	3	6	6	5	6	6	3	2	30	1	1.25	6	3	1	2.75	4	4.666666667	1.125	4	4.636363636
R_3wr9ahE7w5eTLq5	2	Blair	0	3	3	2	3	5	3	3	5	5	3	5	5	3	2	30	1	1.25	6	3	1	2.75	4	4.666666667	1.125	4	3.636363636
R_3wr9ahE7w5eTLq5	2	C.J.	0	4	6	6	6	3	5	4	6	6	6	6	6	6	2	30	1	1.25	6	3	1	2.75	4	4.666666667	1.125	4	5.727272727
R_3wr9ahE7w5eTLq5	2	Cameron	0	2	5	5	5	4	4	4	6	6	6	5	6	6	2	30	1	1.25	6	3	1	2.75	4	4.666666667	1.125	4	5.272727273
R_3wr9ahE7w5eTLq5	2	Chris	0	0	5	5	5	6	2	3	6	6	6	6	6	6	2	30	1	1.25	6	3	1	2.75	4	4.666666667	1.125	4	5.090909091
R_3wr9ahE7w5eTLq5	2	Jamie	0	0	6	5	6	4	4	4	6	6	6	6	6	5	2	30	1	1.25	6	3	1	2.75	4	4.666666667	1.125	4	5.454545455
R_3wr9ahE7w5eTLq5	2	Jessie	0	3	3	2	5	3	5	5	6	6	2	6	6	6	2	30	1	1.25	6	3	1	2.75	4	4.666666667	1.125	4	4.727272727
R_3wr9ahE7w5eTLq5	2	Jordan	0	0	3	5	5	3	5	5	6	6	6	6	6	6	2	30	1	1.25	6	3	1	2.75	4	4.666666667	1.125	4	5.363636364
R_3wr9ahE7w5eTLq5	2	Pat	2	0	3	3	5	4	4	4	5	5	5	3	5	5	2	30	1	1.25	6	3	1	2.75	4	4.666666667	1.125	4	4.272727273
R_3wr9ahE7w5eTLq5	2	Sam	2	0	5	3	5	5	3	3	5	5	5	5	5	3	2	30	1	1.25	6	3	1	2.75	4	4.666666667	1.125	4	4.272727273
R_3wr9ahE7w5eTLq5	2	Taylor	0	0	5	5	6	3	5	3	6	5	5	5	5	5	2	30	1	1.25	6	3	1	2.75	4	4.666666667	1.125	4	5
R_3Wv71iaTlkfsmH3	3	Adrian	0	0	5	5	7	2	6	4	6	7	6	6	6	6	4	31	3	2.5	6	3	1	3.875	4.777777778	5	1.375	4.1	5.818181818
R_3Wv71iaTlkfsmH3	3	Alex	0	0	3	2	3	4	4	4	4	4	3	4	5	5	4	31	3	2.5	6	3	1	3.875	4.777777778	5	1.375	4.1	3.727272727
R_3Wv71iaTlkfsmH3	3	Blair	2	0	1	1	1	5	3	3	4	1	1	4	3	4	4	31	3	2.5	6	3	1	3.875	4.777777778	5	1.375	4.1	2.363636364
R_3Wv71iaTlkfsmH3	3	C.J.	2	0	3	2	2	5	3	2	4	3	3	3	3	4	4	31	3	2.5	6	3	1	3.875	4.777777778	5	1.375	4.1	2.909090909
R_3Wv71iaTlkfsmH3	3	Cameron	3	0	5	5	7	5	3	3	7	7	6	6	6	3	4	31	3	2.5	6	3	1	3.875	4.777777778	5	1.375	4.1	5.272727273
R_3Wv71iaTlkfsmH3	3	Chris	0	3	5	4	5	3	5	5	5	5	5	5	4	5	4	31	3	2.5	6	3	1	3.875	4.777777778	5	1.375	4.1	4.818181818
R_3Wv71iaTlkfsmH3	3	Jamie	0	3	6	6	6	3	5	6	6	6	6	6	6	6	4	31	3	2.5	6	3	1	3.875	4.777777778	5	1.375	4.1	5.909090909
R_3Wv71iaTlkfsmH3	3	Jessie	2	0	6	6	7	5	3	3	6	7	6	6	6	6	4	31	3	2.5	6	3	1	3.875	4.777777778	5	1.375	4.1	5.636363636
R_3Wv71iaTlkfsmH3	3	Jordan	0	3	5	4	6	4	4	4	5	6	5	5	5	5	4	31	3	2.5	6	3	1	3.875	4.777777778	5	1.375	4.1	4.909090909
R_3Wv71iaTlkfsmH3	3	Pat	0	0	5	4	6	3	5	4	5	5	5	5	5	5	4	31	3	2.5	6	3	1	3.875	4.777777778	5	1.375	4.1	4.909090909
R_3Wv71iaTlkfsmH3	3	Sam	0	0	6	5	6	3	5	5	6	6	6	6	6	6	4	31	3	2.5	6	3	1	3.875	4.777777778	5	1.375	4.1	5.727272727
R_3Wv71iaTlkfsmH3	3	Taylor	0	4	7	6	7	1	7	7	7	7	7	7	7	7	4	31	3	2.5	6	3	1	3.875	4.777777778	5	1.375	4.1	6.909090909
R_4IcUSPH7KCMjq05	3	Adrian	0	0	5	4	5	3	5	4	6	6	5	6	4	5	4	29	5	2	6	3	1	2.75	3.666666667	3.888888889	3	3.4	5
R_4IcUSPH7KCMjq05	3	Alex	0	0	3	3	3	4	4	4	6	4	4	5	4	5	4	29	5	2	6	3	1	2.75	3.666666667	3.888888889	3	3.4	4.090909091
R_4IcUSPH7KCMjq05	3	Blair	2	0	3	2	5	5	3	3	6	4	4	5	4	3	4	29	5	2	6	3	1	2.75	3.666666667	3.888888889	3	3.4	3.818181818
R_4IcUSPH7KCMjq05	3	C.J.	2	0	2	2	2	6	2	2	6	3	3	4	4	2	4	29	5	2	6	3	1	2.75	3.666666667	3.888888889	3	3.4	2.909090909
R_4IcUSPH7KCMjq05	3	Cameron	3	0	4	3	5	5	3	3	6	6	5	5	4	3	4	29	5	2	6	3	1	2.75	3.666666667	3.888888889	3	3.4	4.272727273
R_4IcUSPH7KCMjq05	3	Chris	0	3	2	2	3	6	2	2	6	4	3	3	4	2	4	29	5	2	6	3	1	2.75	3.666666667	3.888888889	3	3.4	3
R_4IcUSPH7KCMjq05	3	Jamie	0	3	5	3	5	3	5	3	6	5	5	5	4	3	4	29	5	2	6	3	1	2.75	3.666666667	3.888888889	3	3.4	4.454545455
R_4IcUSPH7KCMjq05	3	Jessie	2	0	5	3	4	5	3	3	6	5	5	5	4	3	4	29	5	2	6	3	1	2.75	3.666666667	3.888888889	3	3.4	4.181818182
R_4IcUSPH7KCMjq05	3	Jordan	0	3	4	3	5	4	4	4	6	5	5	5	5	4	4	29	5	2	6	3	1	2.75	3.666666667	3.888888889	3	3.4	4.545454545
R_4IcUSPH7KCMjq05	3	Pat	0	0	4	3	5	4	4	3	6	4	5	5	4	6	4	29	5	2	6	3	1	2.75	3.666666667	3.888888889	3	3.4	4.454545455
R_4IcUSPH7KCMjq05	3	Sam	0	0	5	5	6	2	6	4	6	6	6	6	4	6	4	29	5	2	6	3	1	2.75	3.666666667	3.888888889	3	3.4	5.454545455
R_4IcUSPH7KCMjq05	3	Taylor	0	4	5	4	6	4	4	4	5	6	5	5	4	3	4	29	5	2	6	3	1	2.75	3.666666667	3.888888889	3	3.4	4.636363636
R_4Jco7h1WoQEFRiJ	1	Adrian	0	2	5	3	6	6	2	3	5	6	5	5	5	5	4	41	3	2	6	3	1	3	3.111111111	3.888888889	1.75	4	4.545454545
R_4Jco7h1WoQEFRiJ	1	Alex	0	3	3	1	2	5	3	2	7	4	2	5	4	6	4	41	3	2	6	3	1	3	3.111111111	3.888888889	1.75	4	3.545454545
R_4Jco7h1WoQEFRiJ	1	Blair	0	0	5	2	1	3	5	3	7	2	1	6	2	6	4	41	3	2	6	3	1	3	3.111111111	3.888888889	1.75	4	3.636363636
R_4Jco7h1WoQEFRiJ	1	C.J.	0	0	5	2	1	4	4	4	6	1	1	5	1	7	4	41	3	2	6	3	1	3	3.111111111	3.888888889	1.75	4	3.363636364
R_4Jco7h1WoQEFRiJ	1	Cameron	0	0	5	5	5	2	6	4	5	6	6	5	6	6	4	41	3	2	6	3	1	3	3.111111111	3.888888889	1.75	4	5.363636364
R_4Jco7h1WoQEFRiJ	1	Chris	2	0	5	5	3	3	5	4	4	4	4	4	4	3	4	41	3	2	6	3	1	3	3.111111111	3.888888889	1.75	4	4.090909091
R_4Jco7h1WoQEFRiJ	1	Jamie	2	0	5	3	2	5	3	2	5	2	2	5	2	5	4	41	3	2	6	3	1	3	3.111111111	3.888888889	1.75	4	3.272727273
R_4Jco7h1WoQEFRiJ	1	Jessie	0	0	5	3	7	2	6	4	5	7	6	5	6	6	4	41	3	2	6	3	1	3	3.111111111	3.888888889	1.75	4	5.454545455
R_4Jco7h1WoQEFRiJ	1	Jordan	3	0	5	5	2	5	3	5	5	2	2	5	3	5	4	41	3	2	6	3	1	3	3.111111111	3.888888889	1.75	4	3.818181818
R_4Jco7h1WoQEFRiJ	1	Pat	0	2	1	1	2	6	2	1	6	2	1	5	3	5	4	41	3	2	6	3	1	3	3.111111111	3.888888889	1.75	4	2.636363636
R_4Jco7h1WoQEFRiJ	1	Sam	1	4	5	2	3	6	2	2	6	6	5	6	5	5	4	41	3	2	6	3	1	3	3.111111111	3.888888889	1.75	4	4.272727273
R_4Jco7h1WoQEFRiJ	1	Taylor	4	0	5	5	2	5	3	2	3	6	5	4	5	5	4	41	3	2	6	3	1	3	3.111111111	3.888888889	1.75	4	4.090909091
R_4Yq8mxqvADdqbWZ	1	Adrian	0	2	4	2	4	3	5	2	5	5	3	5	3	5	2	32	7	5.25	5	4	1	2.625	2.444444444	4	2	3.2	3.909090909
R_4Yq8mxqvADdqbWZ	1	Alex	0	3	4	2	2	4	4	3	5	4	4	5	3	5	2	32	7	5.25	5	4	1	2.625	2.444444444	4	2	3.2	3.727272727
R_4Yq8mxqvADdqbWZ	1	Blair	0	0	5	4	3	4	4	3	5	5	5	5	4	5	2	32	7	5.25	5	4	1	2.625	2.444444444	4	2	3.2	4.363636364
R_4Yq8mxqvADdqbWZ	1	C.J.	0	0	5	3	4	5	3	3	5	3	2	4	2	5	2	32	7	5.25	5	4	1	2.625	2.444444444	4	2	3.2	3.545454545
R_4Yq8mxqvADdqbWZ	1	Cameron	0	0	5	5	6	3	5	3	6	6	6	6	6	6	2	32	7	5.25	5	4	1	2.625	2.444444444	4	2	3.2	5.454545455
R_4Yq8mxqvADdqbWZ	1	Chris	2	0	5	3	5	4	4	3	5	3	3	4	3	5	2	32	7	5.25	5	4	1	2.625	2.444444444	4	2	3.2	3.909090909
R_4Yq8mxqvADdqbWZ	1	Jamie	2	0	4	3	5	3	5	2	5	5	4	5	3	5	2	32	7	5.25	5	4	1	2.625	2.444444444	4	2	3.2	4.181818182
R_4Yq8mxqvADdqbWZ	1	Jessie	0	0	5	3	5	3	5	3	6	5	5	5	5	6	2	32	7	5.25	5	4	1	2.625	2.444444444	4	2	3.2	4.818181818
R_4Yq8mxqvADdqbWZ	1	Jordan	3	0	2	2	2	6	2	2	5	3	3	2	2	2	2	32	7	5.25	5	4	1	2.625	2.444444444	4	2	3.2	2.454545455
R_4Yq8mxqvADdqbWZ	1	Pat	0	2	5	3	5	3	5	3	6	5	6	5	5	6	2	32	7	5.25	5	4	1	2.625	2.444444444	4	2	3.2	4.909090909
R_4Yq8mxqvADdqbWZ	1	Sam	1	4	6	5	6	3	5	3	6	6	6	6	4	5	2	32	7	5.25	5	4	1	2.625	2.444444444	4	2	3.2	5.272727273
R_4Yq8mxqvADdqbWZ	1	Taylor	4	0	2	2	2	5	3	3	2	2	3	3	4	3	2	32	7	5.25	5	4	1	2.625	2.444444444	4	2	3.2	2.636363636
R_510tYD25QHx5UK9	1	Adrian	0	2	4	1	5	4	4	4	6	6	4	5	4	6	3	50	3	2.75	7	2	1	3.625	4.111111111	4	2.125	3.2	4.454545455
R_510tYD25QHx5UK9	1	Alex	0	3	4	4	4	4	4	4	5	4	4	5	4	3	3	50	3	2.75	7	2	1	3.625	4.111111111	4	2.125	3.2	4.090909091
R_510tYD25QHx5UK9	1	Blair	0	0	4	2	4	4	4	3	6	4	3	5	4	5	3	50	3	2.75	7	2	1	3.625	4.111111111	4	2.125	3.2	4
R_510tYD25QHx5UK9	1	C.J.	0	0	2	1	4	4	4	3	5	3	3	4	4	4	3	50	3	2.75	7	2	1	3.625	4.111111111	4	2.125	3.2	3.363636364
R_510tYD25QHx5UK9	1	Cameron	0	0	4	5	6	3	5	4	4	5	4	4	5	5	3	50	3	2.75	7	2	1	3.625	4.111111111	4	2.125	3.2	4.636363636
R_510tYD25QHx5UK9	1	Chris	2	0	3	2	3	4	4	3	5	4	4	5	4	3	3	50	3	2.75	7	2	1	3.625	4.111111111	4	2.125	3.2	3.636363636
R_510tYD25QHx5UK9	1	Jamie	2	0	2	1	3	5	3	3	5	4	3	4	4	3	3	50	3	2.75	7	2	1	3.625	4.111111111	4	2.125	3.2	3.181818182
R_510tYD25QHx5UK9	1	Jessie	0	0	3	2	6	3	5	4	5	6	4	5	6	4	3	50	3	2.75	7	2	1	3.625	4.111111111	4	2.125	3.2	4.545454545
R_510tYD25QHx5UK9	1	Jordan	3	0	5	5	6	4	4	4	5	5	6	6	5	5	3	50	3	2.75	7	2	1	3.625	4.111111111	4	2.125	3.2	5.090909091
R_510tYD25QHx5UK9	1	Pat	0	2	5	5	5	4	4	4	5	5	5	6	5	5	3	50	3	2.75	7	2	1	3.625	4.111111111	4	2.125	3.2	4.909090909
R_510tYD25QHx5UK9	1	Sam	1	4	5	4	6	2	6	4	6	6	4	5	4	6	3	50	3	2.75	7	2	1	3.625	4.111111111	4	2.125	3.2	5.090909091
R_510tYD25QHx5UK9	1	Taylor	4	0	3	4	6	3	5	5	5	6	6	4	5	5	3	50	3	2.75	7	2	1	3.625	4.111111111	4	2.125	3.2	4.909090909
R_51PrRtplsCRrin3	1	Adrian	0	2	7	6	6	6	2	3	6	5	6	6	5	6	4	21	6	4.75	6	4	1	3.125	2.777777778	3.222222222	3.125	3	5.272727273
R_51PrRtplsCRrin3	1	Alex	0	3	5	2	2	2	6	2	5	2	5	2	2	2	4	21	6	4.75	6	4	1	3.125	2.777777778	3.222222222	3.125	3	3.181818182
R_51PrRtplsCRrin3	1	Blair	0	0	4	3	4	4	4	3	4	3	4	5	4	5	4	21	6	4.75	6	4	1	3.125	2.777777778	3.222222222	3.125	3	3.909090909
R_51PrRtplsCRrin3	1	C.J.	0	0	5	3	5	4	4	5	5	5	5	3	2	3	4	21	6	4.75	6	4	1	3.125	2.777777778	3.222222222	3.125	3	4.090909091
R_51PrRtplsCRrin3	1	Cameron	0	0	5	4	3	4	4	5	5	4	3	5	4	4	4	21	6	4.75	6	4	1	3.125	2.777777778	3.222222222	3.125	3	4.181818182
R_51PrRtplsCRrin3	1	Chris	2	0	6	7	6	5	3	5	6	7	7	6	7	7	4	21	6	4.75	6	4	1	3.125	2.777777778	3.222222222	3.125	3	6.090909091
R_51PrRtplsCRrin3	1	Jamie	2	0	3	2	2	3	5	2	3	2	3	2	2	2	4	21	6	4.75	6	4	1	3.125	2.777777778	3.222222222	3.125	3	2.545454545
R_51PrRtplsCRrin3	1	Jessie	0	0	5	4	2	4	4	5	5	2	3	4	5	5	4	21	6	4.75	6	4	1	3.125	2.777777778	3.222222222	3.125	3	4
R_51PrRtplsCRrin3	1	Jordan	3	0	5	5	6	7	1	6	7	6	6	6	7	7	4	21	6	4.75	6	4	1	3.125	2.777777778	3.222222222	3.125	3	5.636363636
R_51PrRtplsCRrin3	1	Pat	0	2	2	5	5	4	4	2	5	5	2	2	5	2	4	21	6	4.75	6	4	1	3.125	2.777777778	3.222222222	3.125	3	3.545454545
R_51PrRtplsCRrin3	1	Sam	1	4	7	6	6	6	2	7	6	7	6	6	7	7	4	21	6	4.75	6	4	1	3.125	2.777777778	3.222222222	3.125	3	6.090909091
R_51PrRtplsCRrin3	1	Taylor	4	0	4	4	2	4	4	2	5	2	5	2	2	2	4	21	6	4.75	6	4	1	3.125	2.777777778	3.222222222	3.125	3	3.090909091
R_51qsmbfKJvJ5krP	1	Adrian	0	2	2	1	6	2	6	2	6	6	5	6	5	6	2	34	4	5.5	7	4	1	1.625	3	4.333333333	3.25	3.8	4.636363636
R_51qsmbfKJvJ5krP	1	Alex	0	3	4	3	4	2	6	2	7	4	5	6	4	5	2	34	4	5.5	7	4	1	1.625	3	4.333333333	3.25	3.8	4.545454545
R_51qsmbfKJvJ5krP	1	Blair	0	0	1	1	3	2	6	2	6	3	2	6	2	5	2	34	4	5.5	7	4	1	1.625	3	4.333333333	3.25	3.8	3.363636364
R_51qsmbfKJvJ5krP	1	C.J.	0	0	3	2	4	2	6	2	6	4	2	6	4	5	2	34	4	5.5	7	4	1	1.625	3	4.333333333	3.25	3.8	4
R_51qsmbfKJvJ5krP	1	Cameron	0	0	6	6	7	2	6	3	6	7	6	6	5	6	2	34	4	5.5	7	4	1	1.625	3	4.333333333	3.25	3.8	5.818181818
R_51qsmbfKJvJ5krP	1	Chris	2	0	2	1	2	3	5	2	4	3	2	4	3	2	2	34	4	5.5	7	4	1	1.625	3	4.333333333	3.25	3.8	2.727272727
R_51qsmbfKJvJ5krP	1	Jamie	2	0	2	2	4	2	6	2	6	4	2	6	4	3	2	34	4	5.5	7	4	1	1.625	3	4.333333333	3.25	3.8	3.727272727
R_51qsmbfKJvJ5krP	1	Jessie	0	0	5	2	6	5	3	4	6	6	4	5	6	6	2	34	4	5.5	7	4	1	1.625	3	4.333333333	3.25	3.8	4.818181818
R_51qsmbfKJvJ5krP	1	Jordan	3	0	6	5	6	3	5	3	5	6	6	6	5	5	2	34	4	5.5	7	4	1	1.625	3	4.333333333	3.25	3.8	5.272727273
R_51qsmbfKJvJ5krP	1	Pat	0	2	5	4	4	3	5	3	5	5	4	5	4	5	2	34	4	5.5	7	4	1	1.625	3	4.333333333	3.25	3.8	4.454545455
R_51qsmbfKJvJ5krP	1	Sam	1	4	3	2	4	5	3	2	6	6	3	4	4	3	2	34	4	5.5	7	4	1	1.625	3	4.333333333	3.25	3.8	3.636363636
R_51qsmbfKJvJ5krP	1	Taylor	4	0	2	2	5	5	3	2	4	3	2	5	4	1	2	34	4	5.5	7	4	1	1.625	3	4.333333333	3.25	3.8	3
R_55xa7NJwhlr4CSV	3	Adrian	0	0	5	5	6	2	6	2	6	6	6	6	6	6	2	34	6	1.25	6		2	3.75	4.333333333	4.777777778	2.375	3.5	5.454545455
R_55xa7NJwhlr4CSV	3	Alex	0	0	4	2	2	6	2	1	4	3	2	3	3	1	2	34	6	1.25	6		2	3.75	4.333333333	4.777777778	2.375	3.5	2.454545455
R_55xa7NJwhlr4CSV	3	Blair	2	0	4	2	3	6	2	1	6	2	3	5	3	6	2	34	6	1.25	6		2	3.75	4.333333333	4.777777778	2.375	3.5	3.363636364
R_55xa7NJwhlr4CSV	3	C.J.	2	0	4	1	2	4	4	2	6	2	2	5	3	3	2	34	6	1.25	6		2	3.75	4.333333333	4.777777778	2.375	3.5	3.090909091
R_55xa7NJwhlr4CSV	3	Cameron	3	0	4	6	6	2	6	2	6	6	6	6	6	6	2	34	6	1.25	6		2	3.75	4.333333333	4.777777778	2.375	3.5	5.454545455
R_55xa7NJwhlr4CSV	3	Chris	0	3	4	3	3	5	3	5	6	5	3	6	5	5	2	34	6	1.25	6		2	3.75	4.333333333	4.777777778	2.375	3.5	4.363636364
R_55xa7NJwhlr4CSV	3	Jamie	0	3	4	1	3	6	2	2	6	3	2	6	4	5	2	34	6	1.25	6		2	3.75	4.333333333	4.777777778	2.375	3.5	3.454545455
R_55xa7NJwhlr4CSV	3	Jessie	2	0	5	5	6	2	6	2	6	6	6	6	6	6	2	34	6	1.25	6		2	3.75	4.333333333	4.777777778	2.375	3.5	5.454545455
R_55xa7NJwhlr4CSV	3	Jordan	0	3	4	5	5	3	5	3	6	5	5	6	5	6	2	34	6	1.25	6		2	3.75	4.333333333	4.777777778	2.375	3.5	5
R_55xa7NJwhlr4CSV	3	Pat	0	0	4	1	5	2	6	2	6	6	6	6	6	6	2	34	6	1.25	6		2	3.75	4.333333333	4.777777778	2.375	3.5	4.909090909
R_55xa7NJwhlr4CSV	3	Sam	0	0	4	2	3	5	3	1	5	3	3	3	3	3	2	34	6	1.25	6		2	3.75	4.333333333	4.777777778	2.375	3.5	3
R_55xa7NJwhlr4CSV	3	Taylor	0	4	7	7	7	1	7	2	7	7	7	7	7	7	2	34	6	1.25	6		2	3.75	4.333333333	4.777777778	2.375	3.5	6.545454545
R_56mdOw1mG1L567z	1	Adrian	0	2	4	4	4	4	4	3	4	4	4	4	4	3	4	28	7	1.5	5	3	1	3	3.777777778	3.555555556	2.75	3.9	3.818181818
R_56mdOw1mG1L567z	1	Alex	0	3	3	2	2	5	3	2	4	2	2	2	2	2	4	28	7	1.5	5	3	1	3	3.777777778	3.555555556	2.75	3.9	2.363636364
R_56mdOw1mG1L567z	1	Blair	0	0	5	4	5	3	5	3	6	6	6	6	6	6	4	28	7	1.5	5	3	1	3	3.777777778	3.555555556	2.75	3.9	5.272727273
R_56mdOw1mG1L567z	1	C.J.	0	0	4	3	4	4	4	3	4	4	3	4	3	3	4	28	7	1.5	5	3	1	3	3.777777778	3.555555556	2.75	3.9	3.545454545
R_56mdOw1mG1L567z	1	Cameron	0	0	4	3	4	3	5	4	3	4	3	3	5	4	4	28	7	1.5	5	3	1	3	3.777777778	3.555555556	2.75	3.9	3.818181818
R_56mdOw1mG1L567z	1	Chris	2	0	4	2	3	4	4	2	4	4	3	4	3	2	4	28	7	1.5	5	3	1	3	3.777777778	3.555555556	2.75	3.9	3.181818182
R_56mdOw1mG1L567z	1	Jamie	2	0	3	3	4	5	3	2	5	5	5	5	4	2	4	28	7	1.5	5	3	1	3	3.777777778	3.555555556	2.75	3.9	3.727272727
R_56mdOw1mG1L567z	1	Jessie	0	0	5	4	5	3	5	5	5	5	4	5	5	5	4	28	7	1.5	5	3	1	3	3.777777778	3.555555556	2.75	3.9	4.818181818
R_56mdOw1mG1L567z	1	Jordan	3	0	5	4	5	3	5	5	5	5	5	5	5	5	4	28	7	1.5	5	3	1	3	3.777777778	3.555555556	2.75	3.9	4.909090909
R_56mdOw1mG1L567z	1	Pat	0	2	4	4	5	4	4	3	5	5	5	5	5	5	4	28	7	1.5	5	3	1	3	3.777777778	3.555555556	2.75	3.9	4.545454545
R_56mdOw1mG1L567z	1	Sam	1	4	4	4	5	5	3	3	6	5	5	6	5	4	4	28	7	1.5	5	3	1	3	3.777777778	3.555555556	2.75	3.9	4.545454545
R_56mdOw1mG1L567z	1	Taylor	4	0	4	5	5	2	6	5	4	5	5	4	5	4	4	28	7	1.5	5	3	1	3	3.777777778	3.555555556	2.75	3.9	4.727272727
R_5aOzaPFTsicFeBL	3	Adrian	0	0	2	2	5	4	4	4	6	6	6	6	6	6	1	19	6	1.75	5	3	1	3.125	3.333333333	3.888888889	3	3.7	4.818181818
R_5aOzaPFTsicFeBL	3	Alex	0	0	4	3	3	4	4	4	5	4	3	4	4	3	1	19	6	1.75	5	3	1	3.125	3.333333333	3.888888889	3	3.7	3.727272727
R_5aOzaPFTsicFeBL	3	Blair	2	0	4	4	3	4	4	4	3	3	3	5	3	5	1	19	6	1.75	5	3	1	3.125	3.333333333	3.888888889	3	3.7	3.727272727
R_5aOzaPFTsicFeBL	3	C.J.	2	0	5	4	3	4	4	4	5	3	3	5	5	5	1	19	6	1.75	5	3	1	3.125	3.333333333	3.888888889	3	3.7	4.181818182
R_5aOzaPFTsicFeBL	3	Cameron	3	0	3	3	5	4	4	4	4	4	4	4	4	3	1	19	6	1.75	5	3	1	3.125	3.333333333	3.888888889	3	3.7	3.818181818
R_5aOzaPFTsicFeBL	3	Chris	0	3	4	4	5	4	4	4	6	6	6	6	6	5	1	19	6	1.75	5	3	1	3.125	3.333333333	3.888888889	3	3.7	5.090909091
R_5aOzaPFTsicFeBL	3	Jamie	0	3	4	5	5	4	4	4	5	5	5	5	5	5	1	19	6	1.75	5	3	1	3.125	3.333333333	3.888888889	3	3.7	4.727272727
R_5aOzaPFTsicFeBL	3	Jessie	2	0	6	5	5	4	4	4	5	5	5	5	5	5	1	19	6	1.75	5	3	1	3.125	3.333333333	3.888888889	3	3.7	4.909090909
R_5aOzaPFTsicFeBL	3	Jordan	0	3	5	4	5	4	4	4	6	6	6	6	6	5	1	19	6	1.75	5	3	1	3.125	3.333333333	3.888888889	3	3.7	5.181818182
R_5aOzaPFTsicFeBL	3	Pat	0	0	2	3	5	4	4	4	5	5	5	5	5	5	1	19	6	1.75	5	3	1	3.125	3.333333333	3.888888889	3	3.7	4.363636364
R_5aOzaPFTsicFeBL	3	Sam	0	0	2	2	6	4	4	4	5	5	5	5	5	5	1	19	6	1.75	5	3	1	3.125	3.333333333	3.888888889	3	3.7	4.363636364
R_5aOzaPFTsicFeBL	3	Taylor	0	4	3	3	5	3	5	4	4	4	5	3	4	5	1	19	6	1.75	5	3	1	3.125	3.333333333	3.888888889	3	3.7	4.090909091
R_5C41jC1C2cFUkwR	1	Adrian	0	2	7	6	7	1	7	3	6	7	7	7	7	7	4	25	7	2.75	5	4	1	2.75	3.888888889	5	1.75	3.5	6.454545455
R_5C41jC1C2cFUkwR	1	Alex	0	3	2	2	4	4	4	2	6	4	4	5	4	5	4	25	7	2.75	5	4	1	2.75	3.888888889	5	1.75	3.5	3.818181818
R_5C41jC1C2cFUkwR	1	Blair	0	0	4	2	4	2	6	2	5	4	3	5	5	6	4	25	7	2.75	5	4	1	2.75	3.888888889	5	1.75	3.5	4.181818182
R_5C41jC1C2cFUkwR	1	C.J.	0	0	3	3	2	5	3	2	7	3	2	5	5	6	4	25	7	2.75	5	4	1	2.75	3.888888889	5	1.75	3.5	3.727272727
R_5C41jC1C2cFUkwR	1	Cameron	0	0	5	5	6	2	6	3	5	7	6	5	7	5	4	25	7	2.75	5	4	1	2.75	3.888888889	5	1.75	3.5	5.454545455
R_5C41jC1C2cFUkwR	1	Chris	2	0	1	1	1	7	1	1	5	2	2	1	2	1	4	25	7	2.75	5	4	1	2.75	3.888888889	5	1.75	3.5	1.636363636
R_5C41jC1C2cFUkwR	1	Jamie	2	0	1	1	2	6	2	1	5	4	2	4	3	2	4	25	7	2.75	5	4	1	2.75	3.888888889	5	1.75	3.5	2.454545455
R_5C41jC1C2cFUkwR	1	Jessie	0	0	7	7	7	1	7	4	6	6	7	7	7	7	4	25	7	2.75	5	4	1	2.75	3.888888889	5	1.75	3.5	6.545454545
R_5C41jC1C2cFUkwR	1	Jordan	3	0	1	1	1	6	2	2	5	4	3	3	3	2	4	25	7	2.75	5	4	1	2.75	3.888888889	5	1.75	3.5	2.454545455
R_5C41jC1C2cFUkwR	1	Pat	0	2	7	7	7	1	7	4	6	7	6	6	7	7	4	25	7	2.75	5	4	1	2.75	3.888888889	5	1.75	3.5	6.454545455
R_5C41jC1C2cFUkwR	1	Sam	1	4	7	6	6	2	6	4	7	7	7	7	7	7	4	25	7	2.75	5	4	1	2.75	3.888888889	5	1.75	3.5	6.454545455
R_5C41jC1C2cFUkwR	1	Taylor	4	0	4	3	3	4	4	2	3	6	4	3	6	2	4	25	7	2.75	5	4	1	2.75	3.888888889	5	1.75	3.5	3.636363636
R_5nI90QwX097faDz	3	Adrian	0	0	4	2	4	4	4	2	6	5	5	5	5	6	4	44	2	1.25	6	3	1	1.875	4.222222222	2.777777778	1.125	2.4	4.363636364
R_5nI90QwX097faDz	3	Alex	0	0	4	4	5	2	6	4	7	4	5	6	4	7	4	44	2	1.25	6	3	1	1.875	4.222222222	2.777777778	1.125	2.4	5.090909091
R_5nI90QwX097faDz	3	Blair	2	0	2	1	4	4	4	2	6	3	1	3	3	5	4	44	2	1.25	6	3	1	1.875	4.222222222	2.777777778	1.125	2.4	3.090909091
R_5nI90QwX097faDz	3	C.J.	2	0	4	2	2	3	5	2	5	2	2	4	4	6	4	44	2	1.25	6	3	1	1.875	4.222222222	2.777777778	1.125	2.4	3.454545455
R_5nI90QwX097faDz	3	Cameron	3	0	2	1	6	6	2	2	5	5	4	4	4	3	4	44	2	1.25	6	3	1	1.875	4.222222222	2.777777778	1.125	2.4	3.454545455
R_5nI90QwX097faDz	3	Chris	0	3	2	1	4	4	4	1	5	4	3	4	4	2	4	44	2	1.25	6	3	1	1.875	4.222222222	2.777777778	1.125	2.4	3.090909091
R_5nI90QwX097faDz	3	Jamie	0	3	1	1	4	6	2	2	4	4	4	4	4	2	4	44	2	1.25	6	3	1	1.875	4.222222222	2.777777778	1.125	2.4	2.909090909
R_5nI90QwX097faDz	3	Jessie	2	0	5	2	7	2	6	4	6	7	7	6	6	6	4	44	2	1.25	6	3	1	1.875	4.222222222	2.777777778	1.125	2.4	5.636363636
R_5nI90QwX097faDz	3	Jordan	0	3	1	1	4	6	2	2	5	5	4	4	6	2	4	44	2	1.25	6	3	1	1.875	4.222222222	2.777777778	1.125	2.4	3.272727273
R_5nI90QwX097faDz	3	Pat	0	0	1	1	6	4	4	4	5	4	4	4	4	6	4	44	2	1.25	6	3	1	1.875	4.222222222	2.777777778	1.125	2.4	3.909090909
R_5nI90QwX097faDz	3	Sam	0	0	4	5	6	2	6	2	6	6	5	5	5	5	4	44	2	1.25	6	3	1	1.875	4.222222222	2.777777778	1.125	2.4	5
R_5nI90QwX097faDz	3	Taylor	0	4	1	1	5	7	1	1	4	6	4	4	5	2	4	44	2	1.25	6	3	1	1.875	4.222222222	2.777777778	1.125	2.4	3.090909091
R_5sxdFx7waapMSRn	2	Adrian	3	0	4	2	4	5	3	4	5	4	4	4	4	3	1	33	4	1	6	3	1	2.375	3.111111111	3.555555556	3.375	3.7	3.727272727
R_5sxdFx7waapMSRn	2	Alex	3	0	4	3	4	4	4	4	5	4	4	5	4	5	1	33	4	1	6	3	1	2.375	3.111111111	3.555555556	3.375	3.7	4.181818182
R_5sxdFx7waapMSRn	2	Blair	0	3	5	4	5	3	5	4	5	5	5	5	4	5	1	33	4	1	6	3	1	2.375	3.111111111	3.555555556	3.375	3.7	4.727272727
R_5sxdFx7waapMSRn	2	C.J.	0	4	5	4	4	4	4	4	5	4	4	5	4	3	1	33	4	1	6	3	1	2.375	3.111111111	3.555555556	3.375	3.7	4.181818182
R_5sxdFx7waapMSRn	2	Cameron	0	2	5	5	5	2	6	3	4	5	6	4	5	6	1	33	4	1	6	3	1	2.375	3.111111111	3.555555556	3.375	3.7	4.909090909
R_5sxdFx7waapMSRn	2	Chris	0	0	4	3	5	3	5	4	5	5	4	5	4	6	1	33	4	1	6	3	1	2.375	3.111111111	3.555555556	3.375	3.7	4.545454545
R_5sxdFx7waapMSRn	2	Jamie	0	0	4	4	5	4	4	4	5	5	4	5	4	6	1	33	4	1	6	3	1	2.375	3.111111111	3.555555556	3.375	3.7	4.545454545
R_5sxdFx7waapMSRn	2	Jessie	0	3	5	4	5	4	4	4	5	6	5	5	4	6	1	33	4	1	6	3	1	2.375	3.111111111	3.555555556	3.375	3.7	4.818181818
R_5sxdFx7waapMSRn	2	Jordan	0	0	4	4	5	3	5	3	5	5	5	5	4	5	1	33	4	1	6	3	1	2.375	3.111111111	3.555555556	3.375	3.7	4.545454545
R_5sxdFx7waapMSRn	2	Pat	2	0	4	3	5	3	5	4	5	4	4	5	4	6	1	33	4	1	6	3	1	2.375	3.111111111	3.555555556	3.375	3.7	4.454545455
R_5sxdFx7waapMSRn	2	Sam	2	0	4	4	5	4	4	4	5	5	4	5	4	6	1	33	4	1	6	3	1	2.375	3.111111111	3.555555556	3.375	3.7	4.545454545
R_5sxdFx7waapMSRn	2	Taylor	0	0	4	4	6	2	6	4	5	6	5	4	5	6	1	33	4	1	6	3	1	2.375	3.111111111	3.555555556	3.375	3.7	5
R_5u29kQHMXmtxujX	2	Adrian	3	0	5	5	5	5	3	3	6	5	4	5	5	2	4	24	5	3.25	6	3	1	3.625	3.555555556	4.111111111	2.25	2.9	4.363636364
R_5u29kQHMXmtxujX	2	Alex	3	0	3	3	3	6	2	2	5	3	3	3	3	2	4	24	5	3.25	6	3	1	3.625	3.555555556	4.111111111	2.25	2.9	2.909090909
R_5u29kQHMXmtxujX	2	Blair	0	3	4	3	3	5	3	2	6	3	3	3	3	3	4	24	5	3.25	6	3	1	3.625	3.555555556	4.111111111	2.25	2.9	3.272727273
R_5u29kQHMXmtxujX	2	C.J.	0	4	3	3	5	5	3	3	5	3	3	3	4	4	4	24	5	3.25	6	3	1	3.625	3.555555556	4.111111111	2.25	2.9	3.545454545
R_5u29kQHMXmtxujX	2	Cameron	0	2	6	6	5	3	5	5	6	6	6	6	6	6	4	24	5	3.25	6	3	1	3.625	3.555555556	4.111111111	2.25	2.9	5.727272727
R_5u29kQHMXmtxujX	2	Chris	0	0	5	5	6	3	5	4	5	5	5	5	5	4	4	24	5	3.25	6	3	1	3.625	3.555555556	4.111111111	2.25	2.9	4.909090909
R_5u29kQHMXmtxujX	2	Jamie	0	0	5	5	6	3	5	6	6	5	5	5	5	5	4	24	5	3.25	6	3	1	3.625	3.555555556	4.111111111	2.25	2.9	5.272727273
R_5u29kQHMXmtxujX	2	Jessie	0	3	6	6	6	2	6	6	6	6	6	6	6	6	4	24	5	3.25	6	3	1	3.625	3.555555556	4.111111111	2.25	2.9	6
R_5u29kQHMXmtxujX	2	Jordan	0	0	6	5	6	3	5	6	6	6	6	6	5	6	4	24	5	3.25	6	3	1	3.625	3.555555556	4.111111111	2.25	2.9	5.727272727
R_5u29kQHMXmtxujX	2	Pat	2	0	3	3	5	5	3	4	5	5	4	4	4	2	4	24	5	3.25	6	3	1	3.625	3.555555556	4.111111111	2.25	2.9	3.818181818
R_5u29kQHMXmtxujX	2	Sam	2	0	6	5	3	5	3	3	6	5	5	5	5	2	4	24	5	3.25	6	3	1	3.625	3.555555556	4.111111111	2.25	2.9	4.363636364
R_5u29kQHMXmtxujX	2	Taylor	0	0	7	7	6	7	1	7	6	6	6	6	6	7	4	24	5	3.25	6	3	1	3.625	3.555555556	4.111111111	2.25	2.9	5.909090909
R_5zg5Q8kp2JvtvG5	2	Adrian	3	0	6	5	5	5	3	3	6	6	5	5	6	1	4	41	2	3	7	2	1	3.5	4.888888889	5	1.25	3.2	4.636363636
R_5zg5Q8kp2JvtvG5	2	Alex	3	0	5	5	5	5	3	3	6	6	5	6	6	2	4	41	2	3	7	2	1	3.5	4.888888889	5	1.25	3.2	4.727272727
R_5zg5Q8kp2JvtvG5	2	Blair	0	3	3	2	5	6	2	2	5	5	2	5	5	2	4	41	2	3	7	2	1	3.5	4.888888889	5	1.25	3.2	3.454545455
R_5zg5Q8kp2JvtvG5	2	C.J.	0	4	3	2	5	3	5	2	6	5	3	6	6	5	4	41	2	3	7	2	1	3.5	4.888888889	5	1.25	3.2	4.363636364
R_5zg5Q8kp2JvtvG5	2	Cameron	0	2	6	6	7	5	3	5	6	7	6	6	7	6	4	41	2	3	7	2	1	3.5	4.888888889	5	1.25	3.2	5.909090909
R_5zg5Q8kp2JvtvG5	2	Chris	0	0	6	5	6	2	6	5	6	7	6	6	7	5	4	41	2	3	7	2	1	3.5	4.888888889	5	1.25	3.2	5.909090909
R_5zg5Q8kp2JvtvG5	2	Jamie	0	0	5	5	6	3	5	3	6	7	5	6	6	6	4	41	2	3	7	2	1	3.5	4.888888889	5	1.25	3.2	5.454545455
R_5zg5Q8kp2JvtvG5	2	Jessie	0	3	7	6	7	5	3	5	6	7	7	7	7	6	4	41	2	3	7	2	1	3.5	4.888888889	5	1.25	3.2	6.181818182
R_5zg5Q8kp2JvtvG5	2	Jordan	0	0	6	5	6	5	3	5	7	6	6	6	7	5	4	41	2	3	7	2	1	3.5	4.888888889	5	1.25	3.2	5.636363636
R_5zg5Q8kp2JvtvG5	2	Pat	2	0	6	5	5	5	3	5	6	6	5	6	6	3	4	41	2	3	7	2	1	3.5	4.888888889	5	1.25	3.2	5.090909091
R_5zg5Q8kp2JvtvG5	2	Sam	2	0	5	5	6	3	5	3	5	6	5	6	6	2	4	41	2	3	7	2	1	3.5	4.888888889	5	1.25	3.2	4.909090909
R_5zg5Q8kp2JvtvG5	2	Taylor	0	0	6	6	7	3	5	5	6	7	6	6	6	7	4	41	2	3	7	2	1	3.5	4.888888889	5	1.25	3.2	6.090909091
R_6lC3HScrPjYLbA9	3	Adrian	0	0	5	3	4	4	4	4	5	5	4	5	4	5	4	42	7	3.75	7	3	1	2.875	3.333333333	4	2.625	3.6	4.363636364
R_6lC3HScrPjYLbA9	3	Alex	0	0	3	3	3	5	3	3	5	4	4	4	4	5	4	42	7	3.75	7	3	1	2.875	3.333333333	4	2.625	3.6	3.727272727
R_6lC3HScrPjYLbA9	3	Blair	2	0	3	2	3	5	3	3	5	3	2	5	3	4	4	42	7	3.75	7	3	1	2.875	3.333333333	4	2.625	3.6	3.272727273
R_6lC3HScrPjYLbA9	3	C.J.	2	0	5	3	4	3	5	3	5	3	3	5	4	4	4	42	7	3.75	7	3	1	2.875	3.333333333	4	2.625	3.6	4
R_6lC3HScrPjYLbA9	3	Cameron	3	0	5	5	5	3	5	3	5	5	5	5	5	5	4	42	7	3.75	7	3	1	2.875	3.333333333	4	2.625	3.6	4.818181818
R_6lC3HScrPjYLbA9	3	Chris	0	3	4	3	3	3	5	3	5	4	4	5	4	3	4	42	7	3.75	7	3	1	2.875	3.333333333	4	2.625	3.6	3.909090909
R_6lC3HScrPjYLbA9	3	Jamie	0	3	5	4	4	4	4	3	5	5	3	5	4	4	4	42	7	3.75	7	3	1	2.875	3.333333333	4	2.625	3.6	4.181818182
R_6lC3HScrPjYLbA9	3	Jessie	2	0	5	4	5	3	5	4	5	5	5	5	5	4	4	42	7	3.75	7	3	1	2.875	3.333333333	4	2.625	3.6	4.727272727
R_6lC3HScrPjYLbA9	3	Jordan	0	3	3	3	3	5	3	3	5	3	3	5	4	4	4	42	7	3.75	7	3	1	2.875	3.333333333	4	2.625	3.6	3.545454545
R_6lC3HScrPjYLbA9	3	Pat	0	0	5	3	4	4	4	3	5	4	4	4	4	4	4	42	7	3.75	7	3	1	2.875	3.333333333	4	2.625	3.6	4
R_6lC3HScrPjYLbA9	3	Sam	0	0	5	5	4	4	4	3	5	5	4	5	4	5	4	42	7	3.75	7	3	1	2.875	3.333333333	4	2.625	3.6	4.454545455
R_6lC3HScrPjYLbA9	3	Taylor	0	4	5	4	6	4	4	4	5	5	5	5	4	5	4	42	7	3.75	7	3	1	2.875	3.333333333	4	2.625	3.6	4.727272727
R_6rGSAbn5s0wLjEh	1	Adrian	0	2	5	6	6	7	1	6	5	5	6	4	6	5	2	34	6	5.5	6	3	1	4.125	4	3.666666667	3.125	3.7	5
R_6rGSAbn5s0wLjEh	1	Alex	0	3	5	6	6	5	3	5	5	6	6	7	6	5	2	34	6	5.5	6	3	1	4.125	4	3.666666667	3.125	3.7	5.454545455
R_6rGSAbn5s0wLjEh	1	Blair	0	0	7	6	6	3	5	4	7	5	5	6	6	7	2	34	6	5.5	6	3	1	4.125	4	3.666666667	3.125	3.7	5.818181818
R_6rGSAbn5s0wLjEh	1	C.J.	0	0	6	4	6	4	4	6	5	6	6	5	6	7	2	34	6	5.5	6	3	1	4.125	4	3.666666667	3.125	3.7	5.545454545
R_6rGSAbn5s0wLjEh	1	Cameron	0	0	6	6	7	6	2	5	6	6	5	7	6	5	2	34	6	5.5	6	3	1	4.125	4	3.666666667	3.125	3.7	5.545454545
R_6rGSAbn5s0wLjEh	1	Chris	2	0	6	4	5	6	2	5	7	5	6	5	6	6	2	34	6	5.5	6	3	1	4.125	4	3.666666667	3.125	3.7	5.181818182
R_6rGSAbn5s0wLjEh	1	Jamie	2	0	5	5	7	5	3	5	6	7	6	4	4	5	2	34	6	5.5	6	3	1	4.125	4	3.666666667	3.125	3.7	5.181818182
R_6rGSAbn5s0wLjEh	1	Jessie	0	0	6	7	6	5	3	6	5	6	5	4	5	6	2	34	6	5.5	6	3	1	4.125	4	3.666666667	3.125	3.7	5.363636364
R_6rGSAbn5s0wLjEh	1	Jordan	3	0	6	7	7	6	2	5	6	5	6	5	4	5	2	34	6	5.5	6	3	1	4.125	4	3.666666667	3.125	3.7	5.272727273
R_6rGSAbn5s0wLjEh	1	Pat	0	2	6	5	5	4	4	3	6	5	7	5	6	6	2	34	6	5.5	6	3	1	4.125	4	3.666666667	3.125	3.7	5.272727273
R_6rGSAbn5s0wLjEh	1	Sam	1	4	6	6	7	6	2	5	7	6	5	6	7	6	2	34	6	5.5	6	3	1	4.125	4	3.666666667	3.125	3.7	5.727272727
R_6rGSAbn5s0wLjEh	1	Taylor	4	0	6	7	6	2	6	6	4	6	6	5	6	5	2	34	6	5.5	6	3	1	4.125	4	3.666666667	3.125	3.7	5.727272727
R_6rocYfZ2oUGoyjj	3	Adrian	0	0	5	4	6	4	4	4	5	6	5	4	4	6	2	21	6	4.25	5			3.625	3.555555556	3.555555556	2.875	3.6	4.818181818
R_6rocYfZ2oUGoyjj	3	Alex	0	0	4	5	3	4	4	4	5	3	4	5	3	5	2	21	6	4.25	5			3.625	3.555555556	3.555555556	2.875	3.6	4.090909091
R_6rocYfZ2oUGoyjj	3	Blair	2	0	4	3	3	4	4	3	5	2	3	5	2	4	2	21	6	4.25	5			3.625	3.555555556	3.555555556	2.875	3.6	3.454545455
R_6rocYfZ2oUGoyjj	3	C.J.	2	0	5	5	3	4	4	4	5	4	3	5	4	4	2	21	6	4.25	5			3.625	3.555555556	3.555555556	2.875	3.6	4.181818182
R_6rocYfZ2oUGoyjj	3	Cameron	3	0	4	3	5	4	4	4	5	4	5	5	4	3	2	21	6	4.25	5			3.625	3.555555556	3.555555556	2.875	3.6	4.181818182
R_6rocYfZ2oUGoyjj	3	Chris	0	3	3	3	5	4	4	4	5	3	3	4	4	3	2	21	6	4.25	5			3.625	3.555555556	3.555555556	2.875	3.6	3.727272727
R_6rocYfZ2oUGoyjj	3	Jamie	0	3	5	5	4	3	5	3	5	5	4	5	3	3	2	21	6	4.25	5			3.625	3.555555556	3.555555556	2.875	3.6	4.272727273
R_6rocYfZ2oUGoyjj	3	Jessie	2	0	3	2	5	4	4	3	5	3	3	4	4	2	2	21	6	4.25	5			3.625	3.555555556	3.555555556	2.875	3.6	3.454545455
R_6rocYfZ2oUGoyjj	3	Jordan	0	3	5	4	4	5	3	3	5	3	3	5	4	2	2	21	6	4.25	5			3.625	3.555555556	3.555555556	2.875	3.6	3.727272727
R_6rocYfZ2oUGoyjj	3	Pat	0	0	5	5	5	4	4	4	5	5	4	5	4	6	2	21	6	4.25	5			3.625	3.555555556	3.555555556	2.875	3.6	4.727272727
R_6rocYfZ2oUGoyjj	3	Sam	0	0	4	3	5	4	4	4	4	5	5	3	4	6	2	21	6	4.25	5			3.625	3.555555556	3.555555556	2.875	3.6	4.272727273
R_6rocYfZ2oUGoyjj	3	Taylor	0	4	3	3	3	4	4	4	2	3	4	3	4	2	2	21	6	4.25	5			3.625	3.555555556	3.555555556	2.875	3.6	3.181818182
R_6sYjaR1gtC4DzZX	1	Adrian	0	2	5	4	5	3	5	2	6	6	6	6	5	6	4	24	3	2.5	7	4	1	2.375	4.222222222	4.333333333	1.75	3.2	5.090909091
R_6sYjaR1gtC4DzZX	1	Alex	0	3	2	2	2	6	2	1	6	3	2	4	4	2	4	24	3	2.5	7	4	1	2.375	4.222222222	4.333333333	1.75	3.2	2.727272727
R_6sYjaR1gtC4DzZX	1	Blair	0	0	4	3	5	2	6	3	5	5	3	6	4	5	4	24	3	2.5	7	4	1	2.375	4.222222222	4.333333333	1.75	3.2	4.454545455
R_6sYjaR1gtC4DzZX	1	C.J.	0	0	4	2	2	3	5	3	5	2	3	5	4	5	4	24	3	2.5	7	4	1	2.375	4.222222222	4.333333333	1.75	3.2	3.636363636
R_6sYjaR1gtC4DzZX	1	Cameron	0	0	6	6	6	2	6	3	6	6	6	6	6	6	4	24	3	2.5	7	4	1	2.375	4.222222222	4.333333333	1.75	3.2	5.727272727
R_6sYjaR1gtC4DzZX	1	Chris	2	0	3	2	3	5	3	3	3	4	2	3	3	4	4	24	3	2.5	7	4	1	2.375	4.222222222	4.333333333	1.75	3.2	3
R_6sYjaR1gtC4DzZX	1	Jamie	2	0	2	1	2	6	2	1	4	3	2	3	3	2	4	24	3	2.5	7	4	1	2.375	4.222222222	4.333333333	1.75	3.2	2.272727273
R_6sYjaR1gtC4DzZX	1	Jessie	0	0	5	2	6	2	6	4	6	6	6	6	5	5	4	24	3	2.5	7	4	1	2.375	4.222222222	4.333333333	1.75	3.2	5.181818182
R_6sYjaR1gtC4DzZX	1	Jordan	3	0	3	2	2	5	3	3	5	2	3	5	4	4	4	24	3	2.5	7	4	1	2.375	4.222222222	4.333333333	1.75	3.2	3.272727273
R_6sYjaR1gtC4DzZX	1	Pat	0	2	5	3	6	3	5	3	6	6	5	6	5	6	4	24	3	2.5	7	4	1	2.375	4.222222222	4.333333333	1.75	3.2	5.090909091
R_6sYjaR1gtC4DzZX	1	Sam	1	4	5	4	5	3	5	2	5	5	5	5	4	5	4	24	3	2.5	7	4	1	2.375	4.222222222	4.333333333	1.75	3.2	4.545454545
R_6sYjaR1gtC4DzZX	1	Taylor	4	0	6	5	6	5	3	2	3	6	6	5	5	5	4	24	3	2.5	7	4	1	2.375	4.222222222	4.333333333	1.75	3.2	4.727272727
R_6tEzcnQWqZRRoln	2	Adrian	3	0	3	1	5	3	5	1	5	5	4	4	4	3	1	31	6	1.75	6	3	1	3	3.444444444	3.666666667	4.75	3.5	3.636363636
R_6tEzcnQWqZRRoln	2	Alex	3	0	3	1	3	5	3	2	5	4	4	4	4	2	1	31	6	1.75	6	3	1	3	3.444444444	3.666666667	4.75	3.5	3.181818182
R_6tEzcnQWqZRRoln	2	Blair	0	3	2	1	2	6	2	1	5	3	3	3	3	1	1	31	6	1.75	6	3	1	3	3.444444444	3.666666667	4.75	3.5	2.363636364
R_6tEzcnQWqZRRoln	2	C.J.	0	4	4	3	3	4	4	2	5	3	3	4	4	2	1	31	6	1.75	6	3	1	3	3.444444444	3.666666667	4.75	3.5	3.363636364
R_6tEzcnQWqZRRoln	2	Cameron	0	2	5	4	5	2	6	2	4	5	6	5	4	4	1	31	6	1.75	6	3	1	3	3.444444444	3.666666667	4.75	3.5	4.545454545
R_6tEzcnQWqZRRoln	2	Chris	0	0	4	3	3	4	4	2	4	4	4	4	4	4	1	31	6	1.75	6	3	1	3	3.444444444	3.666666667	4.75	3.5	3.636363636
R_6tEzcnQWqZRRoln	2	Jamie	0	0	5	5	4	4	4	2	4	4	4	5	4	3	1	31	6	1.75	6	3	1	3	3.444444444	3.666666667	4.75	3.5	4
R_6tEzcnQWqZRRoln	2	Jessie	0	3	3	1	4	2	6	2	3	3	2	4	4	2	1	31	6	1.75	6	3	1	3	3.444444444	3.666666667	4.75	3.5	3.090909091
R_6tEzcnQWqZRRoln	2	Jordan	0	0	4	1	5	4	4	3	5	5	4	4	4	3	1	31	6	1.75	6	3	1	3	3.444444444	3.666666667	4.75	3.5	3.818181818
R_6tEzcnQWqZRRoln	2	Pat	2	0	4	3	4	3	5	2	5	4	4	5	4	3	1	31	6	1.75	6	3	1	3	3.444444444	3.666666667	4.75	3.5	3.909090909
R_6tEzcnQWqZRRoln	2	Sam	2	0	5	4	5	2	6	2	5	5	5	5	4	3	1	31	6	1.75	6	3	1	3	3.444444444	3.666666667	4.75	3.5	4.454545455
R_6tEzcnQWqZRRoln	2	Taylor	0	0	5	3	5	2	6	2	4	5	5	5	4	6	1	31	6	1.75	6	3	1	3	3.444444444	3.666666667	4.75	3.5	4.545454545
R_6YyMxhYkzTCwDSB	3	Adrian	0	0	3	5	5	4	4	6	5	3	4	6	5	5	4	35	3	3	5			3.125	2.888888889	2.777777778	3	3.3	4.636363636
R_6YyMxhYkzTCwDSB	3	Alex	0	0	3	6	5	5	3	3	4	6	4	4	6	5	4	35	3	3	5			3.125	2.888888889	2.777777778	3	3.3	4.454545455
R_6YyMxhYkzTCwDSB	3	Blair	2	0	3	5	4	6	2	3	4	5	4	3	5	4	4	35	3	3	5			3.125	2.888888889	2.777777778	3	3.3	3.818181818
R_6YyMxhYkzTCwDSB	3	C.J.	2	0	3	5	4	6	2	4	3	5	4	6	5	5	4	35	3	3	5			3.125	2.888888889	2.777777778	3	3.3	4.181818182
R_6YyMxhYkzTCwDSB	3	Cameron	3	0	4	6	5	3	5	3	5	4	6	3	3	4	4	35	3	3	5			3.125	2.888888889	2.777777778	3	3.3	4.363636364
R_6YyMxhYkzTCwDSB	3	Chris	0	3	3	6	5	3	5	4	3	6	5	4	5	5	4	35	3	3	5			3.125	2.888888889	2.777777778	3	3.3	4.636363636
R_6YyMxhYkzTCwDSB	3	Jamie	0	3	4	6	5	3	5	3	4	3	6	4	5	4	4	35	3	3	5			3.125	2.888888889	2.777777778	3	3.3	4.454545455
R_6YyMxhYkzTCwDSB	3	Jessie	2	0	3	6	5	4	4	6	4	5	3	3	5	4	4	35	3	3	5			3.125	2.888888889	2.777777778	3	3.3	4.363636364
R_6YyMxhYkzTCwDSB	3	Jordan	0	3	3	6	5	3	5	6	5	4	5	4	5	5	4	35	3	3	5			3.125	2.888888889	2.777777778	3	3.3	4.818181818
R_6YyMxhYkzTCwDSB	3	Pat	0	0	3	6	5	3	5	4	4	6	5	3	4	4	4	35	3	3	5			3.125	2.888888889	2.777777778	3	3.3	4.454545455
R_6YyMxhYkzTCwDSB	3	Sam	0	0	3	6	5	3	5	3	5	4	6	4	4	5	4	35	3	3	5			3.125	2.888888889	2.777777778	3	3.3	4.545454545
R_6YyMxhYkzTCwDSB	3	Taylor	0	4	3	6	5	4	4	4	6	6	4	5	4	5	4	35	3	3	5			3.125	2.888888889	2.777777778	3	3.3	4.727272727
R_785TPqyuc8mxQkl	3	Adrian	0	0	6	2	6	2	6	5	6	6	6	6	6	6	4	27	7	3.75	6	3	1	2.875	4.111111111	3.444444444	2.125	4.1	5.545454545
R_785TPqyuc8mxQkl	3	Alex	0	0	5	2	5	4	4	3	6	5	4	6	4	6	4	27	7	3.75	6	3	1	2.875	4.111111111	3.444444444	2.125	4.1	4.545454545
R_785TPqyuc8mxQkl	3	Blair	2	0	2	1	3	2	6	2	5	2	1	5	3	5	4	27	7	3.75	6	3	1	2.875	4.111111111	3.444444444	2.125	4.1	3.181818182
R_785TPqyuc8mxQkl	3	C.J.	2	0	5	2	3	3	5	5	6	3	3	6	6	6	4	27	7	3.75	6	3	1	2.875	4.111111111	3.444444444	2.125	4.1	4.545454545
R_785TPqyuc8mxQkl	3	Cameron	3	0	5	2	3	3	5	4	6	6	6	6	4	1	4	27	7	3.75	6	3	1	2.875	4.111111111	3.444444444	2.125	4.1	4.363636364
R_785TPqyuc8mxQkl	3	Chris	0	3	3	1	5	5	3	2	6	6	4	5	4	2	4	27	7	3.75	6	3	1	2.875	4.111111111	3.444444444	2.125	4.1	3.727272727
R_785TPqyuc8mxQkl	3	Jamie	0	3	6	2	6	3	5	4	6	6	7	6	6	6	4	27	7	3.75	6	3	1	2.875	4.111111111	3.444444444	2.125	4.1	5.454545455
R_785TPqyuc8mxQkl	3	Jessie	2	0	6	3	6	2	6	3	6	6	7	6	6	7	4	27	7	3.75	6	3	1	2.875	4.111111111	3.444444444	2.125	4.1	5.636363636
R_785TPqyuc8mxQkl	3	Jordan	0	3	2	2	3	3	5	3	4	4	3	4	4	6	4	27	7	3.75	6	3	1	2.875	4.111111111	3.444444444	2.125	4.1	3.636363636
R_785TPqyuc8mxQkl	3	Pat	0	0	5	2	6	2	6	4	6	6	5	6	6	6	4	27	7	3.75	6	3	1	2.875	4.111111111	3.444444444	2.125	4.1	5.272727273
R_785TPqyuc8mxQkl	3	Sam	0	0	7	5	6	2	6	5	7	7	7	7	7	7	4	27	7	3.75	6	3	1	2.875	4.111111111	3.444444444	2.125	4.1	6.454545455
R_785TPqyuc8mxQkl	3	Taylor	0	4	6	5	6	2	6	5	6	7	7	6	6	7	4	27	7	3.75	6	3	1	2.875	4.111111111	3.444444444	2.125	4.1	6.090909091
R_7PS0NgVItNTbWJf	2	Adrian	3	0	2	2	4	3	5	2	5	4	3	4	4	4	4	27	6	2.75	7	4	1	3.125	3.111111111	3.333333333	4.375	4.8	3.545454545
R_7PS0NgVItNTbWJf	2	Alex	3	0	4	4	4	3	5	2	5	4	4	4	4	5	4	27	6	2.75	7	4	1	3.125	3.111111111	3.333333333	4.375	4.8	4.090909091
R_7PS0NgVItNTbWJf	2	Blair	0	3	3	3	1	4	4	1	5	2	2	4	2	4	4	27	6	2.75	7	4	1	3.125	3.111111111	3.333333333	4.375	4.8	2.818181818
R_7PS0NgVItNTbWJf	2	C.J.	0	4	4	2	1	4	4	3	5	1	1	3	1	3	4	27	6	2.75	7	4	1	3.125	3.111111111	3.333333333	4.375	4.8	2.545454545
R_7PS0NgVItNTbWJf	2	Cameron	0	2	5	4	6	3	5	4	6	6	6	6	6	5	4	27	6	2.75	7	4	1	3.125	3.111111111	3.333333333	4.375	4.8	5.363636364
R_7PS0NgVItNTbWJf	2	Chris	0	0	3	2	3	6	2	1	5	4	3	3	3	3	4	27	6	2.75	7	4	1	3.125	3.111111111	3.333333333	4.375	4.8	2.909090909
R_7PS0NgVItNTbWJf	2	Jamie	0	0	4	4	5	4	4	2	5	5	5	5	5	4	4	27	6	2.75	7	4	1	3.125	3.111111111	3.333333333	4.375	4.8	4.363636364
R_7PS0NgVItNTbWJf	2	Jessie	0	3	2	1	2	7	1	1	4	3	2	2	2	1	4	27	6	2.75	7	4	1	3.125	3.111111111	3.333333333	4.375	4.8	1.909090909
R_7PS0NgVItNTbWJf	2	Jordan	0	0	4	4	4	4	4	4	5	4	4	5	4	4	4	27	6	2.75	7	4	1	3.125	3.111111111	3.333333333	4.375	4.8	4.181818182
R_7PS0NgVItNTbWJf	2	Pat	2	0	4	3	5	3	5	4	5	5	4	5	4	5	4	27	6	2.75	7	4	1	3.125	3.111111111	3.333333333	4.375	4.8	4.454545455
R_7PS0NgVItNTbWJf	2	Sam	2	0	5	5	6	3	5	4	7	6	6	5	5	6	4	27	6	2.75	7	4	1	3.125	3.111111111	3.333333333	4.375	4.8	5.454545455
R_7PS0NgVItNTbWJf	2	Taylor	0	0	4	4	6	2	6	5	4	5	4	4	5	4	4	27	6	2.75	7	4	1	3.125	3.111111111	3.333333333	4.375	4.8	4.636363636
R_82qQi4j0RSrepVz	3	Adrian	0	0	3	3	5	4	4	4	5	5	4	4	4	5	4	33	6	3.25	6	2	1	3.375	3.888888889	3.666666667	2.625	4.3	4.181818182
R_82qQi4j0RSrepVz	3	Alex	0	0	2	2	3	5	3	2	3	4	3	3	4	3	4	33	6	3.25	6	2	1	3.375	3.888888889	3.666666667	2.625	4.3	2.909090909
R_82qQi4j0RSrepVz	3	Blair	2	0	1	2	2	6	2	2	4	2	2	2	4	4	4	33	6	3.25	6	2	1	3.375	3.888888889	3.666666667	2.625	4.3	2.454545455
R_82qQi4j0RSrepVz	3	C.J.	2	0	1	1	2	5	3	3	4	2	2	3	4	4	4	33	6	3.25	6	2	1	3.375	3.888888889	3.666666667	2.625	4.3	2.636363636
R_82qQi4j0RSrepVz	3	Cameron	3	0	6	5	6	2	6	6	7	7	6	6	6	6	4	33	6	3.25	6	2	1	3.375	3.888888889	3.666666667	2.625	4.3	6.090909091
R_82qQi4j0RSrepVz	3	Chris	0	3	4	3	4	4	4	4	4	4	4	4	4	3	4	33	6	3.25	6	2	1	3.375	3.888888889	3.666666667	2.625	4.3	3.818181818
R_82qQi4j0RSrepVz	3	Jamie	0	3	3	3	4	5	3	3	3	4	3	3	4	3	4	33	6	3.25	6	2	1	3.375	3.888888889	3.666666667	2.625	4.3	3.272727273
R_82qQi4j0RSrepVz	3	Jessie	2	0	4	3	4	5	3	3	5	5	5	4	4	3	4	33	6	3.25	6	2	1	3.375	3.888888889	3.666666667	2.625	4.3	3.909090909
R_82qQi4j0RSrepVz	3	Jordan	0	3	3	3	3	5	3	5	4	3	3	3	4	4	4	33	6	3.25	6	2	1	3.375	3.888888889	3.666666667	2.625	4.3	3.454545455
R_82qQi4j0RSrepVz	3	Pat	0	0	4	3	4	4	4	3	6	4	4	4	4	5	4	33	6	3.25	6	2	1	3.375	3.888888889	3.666666667	2.625	4.3	4.090909091
R_82qQi4j0RSrepVz	3	Sam	0	0	4	5	5	4	4	5	5	6	5	5	5	5	4	33	6	3.25	6	2	1	3.375	3.888888889	3.666666667	2.625	4.3	4.909090909
R_82qQi4j0RSrepVz	3	Taylor	0	4	4	4	5	3	5	5	4	5	4	4	4	5	4	33	6	3.25	6	2	1	3.375	3.888888889	3.666666667	2.625	4.3	4.454545455
R_85QwRV5fvEFWAiF	3	Adrian	0	0	4	2	5	3	5	5	6	6	6	6	6	6	4	26	2	4	7	3	1	3.75	3.666666667	3.777777778	3.25	4.1	5.181818182
R_85QwRV5fvEFWAiF	3	Alex	0	0	2	2	2	5	3	2	5	2	2	2	4	3	4	26	2	4	7	3	1	3.75	3.666666667	3.777777778	3.25	4.1	2.636363636
R_85QwRV5fvEFWAiF	3	Blair	2	0	3	3	3	5	3	2	6	3	3	5	4	4	4	26	2	4	7	3	1	3.75	3.666666667	3.777777778	3.25	4.1	3.545454545
R_85QwRV5fvEFWAiF	3	C.J.	2	0	3	3	2	5	3	3	6	2	2	4	4	4	4	26	2	4	7	3	1	3.75	3.666666667	3.777777778	3.25	4.1	3.272727273
R_85QwRV5fvEFWAiF	3	Cameron	3	0	2	2	2	6	2	2	5	5	4	4	4	4	4	26	2	4	7	3	1	3.75	3.666666667	3.777777778	3.25	4.1	3.272727273
R_85QwRV5fvEFWAiF	3	Chris	0	3	2	2	2	5	3	3	5	5	4	4	4	2	4	26	2	4	7	3	1	3.75	3.666666667	3.777777778	3.25	4.1	3.272727273
R_85QwRV5fvEFWAiF	3	Jamie	0	3	4	3	3	5	3	3	5	4	4	4	4	3	4	26	2	4	7	3	1	3.75	3.666666667	3.777777778	3.25	4.1	3.636363636
R_85QwRV5fvEFWAiF	3	Jessie	2	0	3	3	3	5	3	3	5	4	3	4	4	2	4	26	2	4	7	3	1	3.75	3.666666667	3.777777778	3.25	4.1	3.363636364
R_85QwRV5fvEFWAiF	3	Jordan	0	3	3	3	3	4	4	4	4	5	4	4	4	4	4	26	2	4	7	3	1	3.75	3.666666667	3.777777778	3.25	4.1	3.818181818
R_85QwRV5fvEFWAiF	3	Pat	0	0	5	5	5	3	5	4	6	5	5	5	5	5	4	26	2	4	7	3	1	3.75	3.666666667	3.777777778	3.25	4.1	5
R_85QwRV5fvEFWAiF	3	Sam	0	0	3	2	2	4	4	3	5	3	3	3	3	4	4	26	2	4	7	3	1	3.75	3.666666667	3.777777778	3.25	4.1	3.181818182
R_85QwRV5fvEFWAiF	3	Taylor	0	4	3	2	2	5	3	2	6	6	5	5	5	5	4	26	2	4	7	3	1	3.75	3.666666667	3.777777778	3.25	4.1	4
R_8871qS2dDPA3WBL	3	Adrian	0	0	3	2	6	2	6	3	6	6	5	5	5	5	2	19	5	3.75	6			2	2.555555556	2.555555556	4	4	4.727272727
R_8871qS2dDPA3WBL	3	Alex	0	0	4	3	4	2	6	3	6	5	4	5	4	4	2	19	5	3.75	6			2	2.555555556	2.555555556	4	4	4.363636364
R_8871qS2dDPA3WBL	3	Blair	2	0	4	3	4	4	4	2	6	4	4	5	4	3	2	19	5	3.75	6			2	2.555555556	2.555555556	4	4	3.909090909
R_8871qS2dDPA3WBL	3	C.J.	2	0	5	5	4	4	4	2	6	3	5	6	4	5	2	19	5	3.75	6			2	2.555555556	2.555555556	4	4	4.454545455
R_8871qS2dDPA3WBL	3	Cameron	3	0	5	5	6	2	6	4	5	6	6	6	6	5	2	19	5	3.75	6			2	2.555555556	2.555555556	4	4	5.454545455
R_8871qS2dDPA3WBL	3	Chris	0	3	5	5	6	2	6	4	6	6	6	5	5	4	2	19	5	3.75	6			2	2.555555556	2.555555556	4	4	5.272727273
R_8871qS2dDPA3WBL	3	Jamie	0	3	3	2	3	6	2	2	6	5	5	5	4	4	2	19	5	3.75	6			2	2.555555556	2.555555556	4	4	3.727272727
R_8871qS2dDPA3WBL	3	Jessie	2	0	4	2	5	3	5	4	5	4	3	3	5	5	2	19	5	3.75	6			2	2.555555556	2.555555556	4	4	4.090909091
R_8871qS2dDPA3WBL	3	Jordan	0	3	3	2	4	6	2	2	5	5	5	5	4	2	2	19	5	3.75	6			2	2.555555556	2.555555556	4	4	3.545454545
R_8871qS2dDPA3WBL	3	Pat	0	0	3	2	6	3	5	4	6	6	5	5	5	5	2	19	5	3.75	6			2	2.555555556	2.555555556	4	4	4.727272727
R_8871qS2dDPA3WBL	3	Sam	0	0	6	4	6	2	6	4	6	6	6	6	5	6	2	19	5	3.75	6			2	2.555555556	2.555555556	4	4	5.545454545
R_8871qS2dDPA3WBL	3	Taylor	0	4	4	2	4	6	2	2	5	6	5	4	4	3	2	19	5	3.75	6			2	2.555555556	2.555555556	4	4	3.727272727
R_8cA7TAgmNfPNZ8F	3	Adrian	0	0	5	3	5	5	3	3	6	6	5	6	6	6	5	41	6	3.75	5			3	3.888888889	3.555555556	2	3.8	4.909090909
R_8cA7TAgmNfPNZ8F	3	Alex	0	0	5	4	3	4	4	3	6	3	4	6	4	5	5	41	6	3.75	5			3	3.888888889	3.555555556	2	3.8	4.272727273
R_8cA7TAgmNfPNZ8F	3	Blair	2	0	5	2	2	6	2	2	5	3	3	5	4	4	5	41	6	3.75	5			3	3.888888889	3.555555556	2	3.8	3.363636364
R_8cA7TAgmNfPNZ8F	3	C.J.	2	0	5	3	3	4	4	2	4	2	1	5	4	4	5	41	6	3.75	5			3	3.888888889	3.555555556	2	3.8	3.363636364
R_8cA7TAgmNfPNZ8F	3	Cameron	3	0	4	3	3	5	3	3	4	6	6	4	5	4	5	41	6	3.75	5			3	3.888888889	3.555555556	2	3.8	4.090909091
R_8cA7TAgmNfPNZ8F	3	Chris	0	3	3	2	2	5	3	2	3	3	2	4	4	1	5	41	6	3.75	5			3	3.888888889	3.555555556	2	3.8	2.636363636
R_8cA7TAgmNfPNZ8F	3	Jamie	0	3	5	4	5	3	5	4	4	4	5	4	5	6	5	41	6	3.75	5			3	3.888888889	3.555555556	2	3.8	4.636363636
R_8cA7TAgmNfPNZ8F	3	Jessie	2	0	5	4	5	4	4	2	5	5	5	5	5	5	5	41	6	3.75	5			3	3.888888889	3.555555556	2	3.8	4.545454545
R_8cA7TAgmNfPNZ8F	3	Jordan	0	3	5	4	5	3	5	4	5	5	5	5	5	5	5	41	6	3.75	5			3	3.888888889	3.555555556	2	3.8	4.818181818
R_8cA7TAgmNfPNZ8F	3	Pat	0	0	5	4	4	2	6	2	5	4	4	5	5	5	5	41	6	3.75	5			3	3.888888889	3.555555556	2	3.8	4.454545455
R_8cA7TAgmNfPNZ8F	3	Sam	0	0	6	6	6	2	6	4	5	5	6	6	6	6	5	41	6	3.75	5			3	3.888888889	3.555555556	2	3.8	5.636363636
R_8cA7TAgmNfPNZ8F	3	Taylor	0	4	4	2	4	3	5	3	3	4	5	4	5	5	5	41	6	3.75	5			3	3.888888889	3.555555556	2	3.8	4
R_8f9QmDVGcQFsBq5	3	Adrian	0	0	2	4	5	2	6	6	5	3	2	2	2	2	4	23	2	4.75	6	3	1	3.125	3	3.222222222	3.125	3.2	3.545454545
R_8f9QmDVGcQFsBq5	3	Alex	0	0	5	4	4	4	4	3	3	4	5	4	4	4	4	23	2	4.75	6	3	1	3.125	3	3.222222222	3.125	3.2	4
R_8f9QmDVGcQFsBq5	3	Blair	2	0	4	2	4	3	5	3	3	2	4	2	2	2	4	23	2	4.75	6	3	1	3.125	3	3.222222222	3.125	3.2	3
R_8f9QmDVGcQFsBq5	3	C.J.	2	0	4	5	4	5	3	3	4	3	5	4	5	4	4	23	2	4.75	6	3	1	3.125	3	3.222222222	3.125	3.2	4
R_8f9QmDVGcQFsBq5	3	Cameron	3	0	4	4	4	2	6	3	4	4	4	5	5	5	4	23	2	4.75	6	3	1	3.125	3	3.222222222	3.125	3.2	4.363636364
R_8f9QmDVGcQFsBq5	3	Chris	0	3	3	4	5	5	3	3	3	3	4	5	5	5	4	23	2	4.75	6	3	1	3.125	3	3.222222222	3.125	3.2	3.909090909
R_8f9QmDVGcQFsBq5	3	Jamie	0	3	3	2	3	3	5	2	2	2	3	2	2	2	4	23	2	4.75	6	3	1	3.125	3	3.222222222	3.125	3.2	2.545454545
R_8f9QmDVGcQFsBq5	3	Jessie	2	0	4	3	4	3	5	3	4	4	4	4	4	4	4	23	2	4.75	6	3	1	3.125	3	3.222222222	3.125	3.2	3.909090909
R_8f9QmDVGcQFsBq5	3	Jordan	0	3	2	5	4	4	4	5	2	4	2	2	4	4	4	23	2	4.75	6	3	1	3.125	3	3.222222222	3.125	3.2	3.454545455
R_8f9QmDVGcQFsBq5	3	Pat	0	0	3	3	3	3	5	3	4	4	4	4	4	4	4	23	2	4.75	6	3	1	3.125	3	3.222222222	3.125	3.2	3.727272727
R_8f9QmDVGcQFsBq5	3	Sam	0	0	3	4	6	4	4	4	3	3	4	4	4	5	4	23	2	4.75	6	3	1	3.125	3	3.222222222	3.125	3.2	4
R_8f9QmDVGcQFsBq5	3	Taylor	0	4	6	6	6	6	2	6	6	6	6	6	6	6	4	23	2	4.75	6	3	1	3.125	3	3.222222222	3.125	3.2	5.636363636
R_8raPMfj93cVfKv3	3	Adrian	0	0	5	4	5	4	4	3	5	5	5	5	5	5	2	20	4	1.25	7	4	1	2.75	2.111111111	4	1.875	4.2	4.636363636
R_8raPMfj93cVfKv3	3	Alex	0	0	2	1	1	5	3	3	2	2	2	2	2	2	2	20	4	1.25	7	4	1	2.75	2.111111111	4	1.875	4.2	2
R_8raPMfj93cVfKv3	3	Blair	2	0	1	1	1	6	2	1	4	1	1	1	1	1	2	20	4	1.25	7	4	1	2.75	2.111111111	4	1.875	4.2	1.363636364
R_8raPMfj93cVfKv3	3	C.J.	2	0	1	1	1	6	2	1	1	1	1	1	1	2	2	20	4	1.25	7	4	1	2.75	2.111111111	4	1.875	4.2	1.181818182
R_8raPMfj93cVfKv3	3	Cameron	3	0	4	3	3	5	3	3	5	5	5	5	4	3	2	20	4	1.25	7	4	1	2.75	2.111111111	4	1.875	4.2	3.909090909
R_8raPMfj93cVfKv3	3	Chris	0	3	3	1	1	5	3	2	4	4	3	3	3	2	2	20	4	1.25	7	4	1	2.75	2.111111111	4	1.875	4.2	2.636363636
R_8raPMfj93cVfKv3	3	Jamie	0	3	4	3	1	6	2	1	5	2	2	4	4	4	2	20	4	1.25	7	4	1	2.75	2.111111111	4	1.875	4.2	2.909090909
R_8raPMfj93cVfKv3	3	Jessie	2	0	5	3	3	5	3	3	5	5	5	4	4	3	2	20	4	1.25	7	4	1	2.75	2.111111111	4	1.875	4.2	3.909090909
R_8raPMfj93cVfKv3	3	Jordan	0	3	3	2	1	5	3	1	4	3	4	3	4	3	2	20	4	1.25	7	4	1	2.75	2.111111111	4	1.875	4.2	2.818181818
R_8raPMfj93cVfKv3	3	Pat	0	0	3	3	3	4	4	3	4	4	3	4	4	4	2	20	4	1.25	7	4	1	2.75	2.111111111	4	1.875	4.2	3.545454545
R_8raPMfj93cVfKv3	3	Sam	0	0	1	1	1	5	3	2	3	3	2	3	3	3	2	20	4	1.25	7	4	1	2.75	2.111111111	4	1.875	4.2	2.272727273
R_8raPMfj93cVfKv3	3	Taylor	0	4	3	2	1	5	3	2	4	4	4	3	3	1	2	20	4	1.25	7	4	1	2.75	2.111111111	4	1.875	4.2	2.727272727
R_8wPCqlGzBUWv2f3	2	Adrian	3	0	4	5	3	6	2	2	6	6	5	6	5	3	5	44	7	1	5	4	1	1	3.333333333	4.777777778	3.875	3.2	4.272727273
R_8wPCqlGzBUWv2f3	2	Alex	3	0	2	1	2	6	2	1	3	2	2	2	3	2	5	44	7	1	5	4	1	1	3.333333333	4.777777778	3.875	3.2	2
R_8wPCqlGzBUWv2f3	2	Blair	0	3	1	1	1	7	1	1	5	2	1	3	1	1	5	44	7	1	5	4	1	1	3.333333333	4.777777778	3.875	3.2	1.636363636
R_8wPCqlGzBUWv2f3	2	C.J.	0	4	2	1	2	6	2	1	4	1	1	3	2	2	5	44	7	1	5	4	1	1	3.333333333	4.777777778	3.875	3.2	1.909090909
R_8wPCqlGzBUWv2f3	2	Cameron	0	2	4	6	6	3	5	3	5	6	6	5	6	3	5	44	7	1	5	4	1	1	3.333333333	4.777777778	3.875	3.2	5
R_8wPCqlGzBUWv2f3	2	Chris	0	0	2	1	1	7	1	1	4	2	2	3	2	4	5	44	7	1	5	4	1	1	3.333333333	4.777777778	3.875	3.2	2.090909091
R_8wPCqlGzBUWv2f3	2	Jamie	0	0	4	3	5	3	5	2	6	5	4	5	5	6	5	44	7	1	5	4	1	1	3.333333333	4.777777778	3.875	3.2	4.545454545
R_8wPCqlGzBUWv2f3	2	Jessie	0	3	3	2	3	6	2	1	5	3	3	4	4	3	5	44	7	1	5	4	1	1	3.333333333	4.777777778	3.875	3.2	3
R_8wPCqlGzBUWv2f3	2	Jordan	0	0	3	3	3	5	3	3	4	3	3	3	4	5	5	44	7	1	5	4	1	1	3.333333333	4.777777778	3.875	3.2	3.363636364
R_8wPCqlGzBUWv2f3	2	Pat	2	0	2	1	4	6	2	2	5	4	3	4	3	3	5	44	7	1	5	4	1	1	3.333333333	4.777777778	3.875	3.2	3
R_8wPCqlGzBUWv2f3	2	Sam	2	0	3	3	5	5	3	1	6	5	5	5	4	2	5	44	7	1	5	4	1	1	3.333333333	4.777777778	3.875	3.2	3.818181818
R_8wPCqlGzBUWv2f3	2	Taylor	0	0	6	6	6	2	6	3	5	6	6	5	6	6	5	44	7	1	5	4	1	1	3.333333333	4.777777778	3.875	3.2	5.545454545
R_8wsBus4Yy27LW3X	1	Adrian	0	2	3	1	4	5	3	3	5	5	4	5	4	5	4	33	6	2	7	4	1	4.875	4.333333333	5	1.75	5	3.818181818
R_8wsBus4Yy27LW3X	1	Alex	0	3	4	2	4	4	4	4	5	4	4	4	4	5	4	33	6	2	7	4	1	4.875	4.333333333	5	1.75	5	4
R_8wsBus4Yy27LW3X	1	Blair	0	0	1	1	3	5	3	3	4	3	3	3	3	4	4	33	6	2	7	4	1	4.875	4.333333333	5	1.75	5	2.818181818
R_8wsBus4Yy27LW3X	1	C.J.	0	0	3	3	3	3	5	3	5	3	1	4	3	4	4	33	6	2	7	4	1	4.875	4.333333333	5	1.75	5	3.363636364
R_8wsBus4Yy27LW3X	1	Cameron	0	0	5	3	5	5	3	3	5	5	5	4	4	4	4	33	6	2	7	4	1	4.875	4.333333333	5	1.75	5	4.181818182
R_8wsBus4Yy27LW3X	1	Chris	2	0	3	2	3	5	3	3	4	4	4	3	3	3	4	33	6	2	7	4	1	4.875	4.333333333	5	1.75	5	3.181818182
R_8wsBus4Yy27LW3X	1	Jamie	2	0	4	3	3	6	2	1	5	5	4	4	4	2	4	33	6	2	7	4	1	4.875	4.333333333	5	1.75	5	3.363636364
R_8wsBus4Yy27LW3X	1	Jessie	0	0	5	3	5	4	4	4	5	5	5	5	5	5	4	33	6	2	7	4	1	4.875	4.333333333	5	1.75	5	4.636363636
R_8wsBus4Yy27LW3X	1	Jordan	3	0	5	6	5	2	6	5	5	5	5	5	5	4	4	33	6	2	7	4	1	4.875	4.333333333	5	1.75	5	5.090909091
R_8wsBus4Yy27LW3X	1	Pat	0	2	5	4	5	4	4	4	5	4	5	5	5	5	4	33	6	2	7	4	1	4.875	4.333333333	5	1.75	5	4.636363636
R_8wsBus4Yy27LW3X	1	Sam	1	4	4	2	4	4	4	4	5	5	4	4	4	4	4	33	6	2	7	4	1	4.875	4.333333333	5	1.75	5	4
R_8wsBus4Yy27LW3X	1	Taylor	4	0	7	7	7	1	7	6	7	7	7	7	7	5	4	33	6	2	7	4	1	4.875	4.333333333	5	1.75	5	6.727272727
R_9KvpRVG1B0tvzF3	2	Adrian	3	0	5	3	6	4	4	4	5	6	4	5	4	5	2	32	4	2.5	4	1	1	2	3.333333333	3.111111111	2	4.4	4.636363636
R_9KvpRVG1B0tvzF3	2	Alex	3	0	3	3	3	4	4	4	5	4	4	4	4	4	2	32	4	2.5	4	1	1	2	3.333333333	3.111111111	2	4.4	3.818181818
R_9KvpRVG1B0tvzF3	2	Blair	0	3	5	5	5	4	4	4	5	4	4	5	4	5	2	32	4	2.5	4	1	1	2	3.333333333	3.111111111	2	4.4	4.545454545
R_9KvpRVG1B0tvzF3	2	C.J.	0	4	2	2	1	4	4	4	4	1	4	4	4	6	2	32	4	2.5	4	1	1	2	3.333333333	3.111111111	2	4.4	3.272727273
R_9KvpRVG1B0tvzF3	2	Cameron	0	2	6	6	5	4	4	4	5	6	4	5	4	6	2	32	4	2.5	4	1	1	2	3.333333333	3.111111111	2	4.4	5
R_9KvpRVG1B0tvzF3	2	Chris	0	0	4	3	4	4	4	4	5	5	4	4	4	4	2	32	4	2.5	4	1	1	2	3.333333333	3.111111111	2	4.4	4.090909091
R_9KvpRVG1B0tvzF3	2	Jamie	0	0	4	4	6	4	4	4	5	6	4	5	4	4	2	32	4	2.5	4	1	1	2	3.333333333	3.111111111	2	4.4	4.545454545
R_9KvpRVG1B0tvzF3	2	Jessie	0	3	4	4	4	4	4	4	5	4	4	4	6	6	2	32	4	2.5	4	1	1	2	3.333333333	3.111111111	2	4.4	4.454545455
R_9KvpRVG1B0tvzF3	2	Jordan	0	0	4	5	3	4	4	4	5	4	4	5	4	5	2	32	4	2.5	4	1	1	2	3.333333333	3.111111111	2	4.4	4.272727273
R_9KvpRVG1B0tvzF3	2	Pat	2	0	4	4	4	3	5	4	6	4	4	5	4	3	2	32	4	2.5	4	1	1	2	3.333333333	3.111111111	2	4.4	4.272727273
R_9KvpRVG1B0tvzF3	2	Sam	2	0	4	5	4	3	5	4	5	4	4	5	4	6	2	32	4	2.5	4	1	1	2	3.333333333	3.111111111	2	4.4	4.545454545
R_9KvpRVG1B0tvzF3	2	Taylor	0	0	4	2	2	4	4	4	3	3	4	4	4	6	2	32	4	2.5	4	1	1	2	3.333333333	3.111111111	2	4.4	3.636363636
R_9p4daIZVjnaBRCR	1	Adrian	0	2	6	5	6	2	6	6	6	6	7	5	6	5	2	28	5	6.5	7	2	1	4	3.888888889	3.888888889	1.75	3.5	5.818181818
R_9p4daIZVjnaBRCR	1	Alex	0	3	4	5	5	6	2	3	5	5	5	5	5	6	2	28	5	6.5	7	2	1	4	3.888888889	3.888888889	1.75	3.5	4.545454545
R_9p4daIZVjnaBRCR	1	Blair	0	0	4	4	5	6	2	3	5	4	4	5	4	4	2	28	5	6.5	7	2	1	4	3.888888889	3.888888889	1.75	3.5	4
R_9p4daIZVjnaBRCR	1	C.J.	0	0	3	3	5	6	2	3	5	3	2	5	5	4	2	28	5	6.5	7	2	1	4	3.888888889	3.888888889	1.75	3.5	3.636363636
R_9p4daIZVjnaBRCR	1	Cameron	0	0	5	5	6	2	6	5	6	7	6	5	6	6	2	28	5	6.5	7	2	1	4	3.888888889	3.888888889	1.75	3.5	5.727272727
R_9p4daIZVjnaBRCR	1	Chris	2	0	4	4	5	5	3	3	4	5	4	5	4	5	2	28	5	6.5	7	2	1	4	3.888888889	3.888888889	1.75	3.5	4.181818182
R_9p4daIZVjnaBRCR	1	Jamie	2	0	5	5	6	3	5	4	5	5	6	5	5	5	2	28	5	6.5	7	2	1	4	3.888888889	3.888888889	1.75	3.5	5.090909091
R_9p4daIZVjnaBRCR	1	Jessie	0	0	6	6	6	2	6	5	6	6	7	6	6	7	2	28	5	6.5	7	2	1	4	3.888888889	3.888888889	1.75	3.5	6.090909091
R_9p4daIZVjnaBRCR	1	Jordan	3	0	6	6	5	1	7	5	6	6	6	6	5	6	2	28	5	6.5	7	2	1	4	3.888888889	3.888888889	1.75	3.5	5.818181818
R_9p4daIZVjnaBRCR	1	Pat	0	2	5	5	5	3	5	3	5	5	5	5	5	6	2	28	5	6.5	7	2	1	4	3.888888889	3.888888889	1.75	3.5	4.909090909
R_9p4daIZVjnaBRCR	1	Sam	1	4	6	6	5	3	5	4	6	5	6	6	6	5	2	28	5	6.5	7	2	1	4	3.888888889	3.888888889	1.75	3.5	5.454545455
R_9p4daIZVjnaBRCR	1	Taylor	4	0	6	5	7	2	6	6	5	6	6	6	6	5	2	28	5	6.5	7	2	1	4	3.888888889	3.888888889	1.75	3.5	5.818181818
R_9QNU7hymi5Nz20R	3	Adrian	0	0	6	1	5	4	4	4	5	5	4	5	4	4	4	30	5	3.75	5	1	1	4.125	4.222222222	4.666666667	1.125	2.8	4.272727273
R_9QNU7hymi5Nz20R	3	Alex	0	0	6	2	4	4	4	4	5	5	4	7	4	4	4	30	5	3.75	5	1	1	4.125	4.222222222	4.666666667	1.125	2.8	4.454545455
R_9QNU7hymi5Nz20R	3	Blair	2	0	6	4	4	4	4	4	5	5	4	5	4	4	4	30	5	3.75	5	1	1	4.125	4.222222222	4.666666667	1.125	2.8	4.454545455
R_9QNU7hymi5Nz20R	3	C.J.	2	0	6	6	3	2	6	2	6	3	4	6	5	5	4	30	5	3.75	5	1	1	4.125	4.222222222	4.666666667	1.125	2.8	4.727272727
R_9QNU7hymi5Nz20R	3	Cameron	3	0	6	4	4	4	4	4	5	5	4	5	4	3	4	30	5	3.75	5	1	1	4.125	4.222222222	4.666666667	1.125	2.8	4.363636364
R_9QNU7hymi5Nz20R	3	Chris	0	3	6	4	4	4	4	4	5	5	4	5	4	2	4	30	5	3.75	5	1	1	4.125	4.222222222	4.666666667	1.125	2.8	4.272727273
R_9QNU7hymi5Nz20R	3	Jamie	0	3	6	6	6	4	4	4	6	6	4	5	4	5	4	30	5	3.75	5	1	1	4.125	4.222222222	4.666666667	1.125	2.8	5.090909091
R_9QNU7hymi5Nz20R	3	Jessie	2	0	6	4	5	4	4	4	5	5	4	5	4	5	4	30	5	3.75	5	1	1	4.125	4.222222222	4.666666667	1.125	2.8	4.636363636
R_9QNU7hymi5Nz20R	3	Jordan	0	3	6	1	5	4	4	4	5	5	4	5	4	5	4	30	5	3.75	5	1	1	4.125	4.222222222	4.666666667	1.125	2.8	4.363636364
R_9QNU7hymi5Nz20R	3	Pat	0	0	6	2	4	4	4	3	5	5	4	5	4	5	4	30	5	3.75	5	1	1	4.125	4.222222222	4.666666667	1.125	2.8	4.272727273
R_9QNU7hymi5Nz20R	3	Sam	0	0	6	6	6	4	4	4	6	6	4	5	4	5	4	30	5	3.75	5	1	1	4.125	4.222222222	4.666666667	1.125	2.8	5.090909091
R_9QNU7hymi5Nz20R	3	Taylor	0	4	6	5	5	3	5	4	6	5	4	5	4	3	4	30	5	3.75	5	1	1	4.125	4.222222222	4.666666667	1.125	2.8	4.727272727
R_9SN7OszaGq9P2sd	2	Adrian	3	0	5	2	3	5	3	2	6	6	6	6	6	2	4	31	6	5.5	6	3	1	1.875	4.222222222	4.333333333	2.5	3.3	4.272727273
R_9SN7OszaGq9P2sd	2	Alex	3	0	2	1	2	6	2	1	4	2	1	3	2	2	4	31	6	5.5	6	3	1	1.875	4.222222222	4.333333333	2.5	3.3	2
R_9SN7OszaGq9P2sd	2	Blair	0	3	3	1	2	6	2	1	7	2	2	5	3	1	4	31	6	5.5	6	3	1	1.875	4.222222222	4.333333333	2.5	3.3	2.636363636
R_9SN7OszaGq9P2sd	2	C.J.	0	4	5	1	2	5	3	1	6	3	3	5	4	3	4	31	6	5.5	6	3	1	1.875	4.222222222	4.333333333	2.5	3.3	3.272727273
R_9SN7OszaGq9P2sd	2	Cameron	0	2	6	6	6	2	6	4	6	6	7	6	6	7	4	31	6	5.5	6	3	1	1.875	4.222222222	4.333333333	2.5	3.3	6
R_9SN7OszaGq9P2sd	2	Chris	0	0	4	2	4	4	4	3	5	4	3	5	4	2	4	31	6	5.5	6	3	1	1.875	4.222222222	4.333333333	2.5	3.3	3.636363636
R_9SN7OszaGq9P2sd	2	Jamie	0	0	5	5	6	2	6	5	5	5	4	6	7	7	4	31	6	5.5	6	3	1	1.875	4.222222222	4.333333333	2.5	3.3	5.545454545
R_9SN7OszaGq9P2sd	2	Jessie	0	3	6	5	5	1	7	6	6	6	6	6	6	6	4	31	6	5.5	6	3	1	1.875	4.222222222	4.333333333	2.5	3.3	5.909090909
R_9SN7OszaGq9P2sd	2	Jordan	0	0	6	3	6	2	6	5	6	6	5	6	6	6	4	31	6	5.5	6	3	1	1.875	4.222222222	4.333333333	2.5	3.3	5.545454545
R_9SN7OszaGq9P2sd	2	Pat	2	0	2	2	4	5	3	1	5	4	2	4	4	2	4	31	6	5.5	6	3	1	1.875	4.222222222	4.333333333	2.5	3.3	3
R_9SN7OszaGq9P2sd	2	Sam	2	0	5	2	6	6	2	1	6	6	5	6	6	5	4	31	6	5.5	6	3	1	1.875	4.222222222	4.333333333	2.5	3.3	4.545454545
R_9SN7OszaGq9P2sd	2	Taylor	0	0	6	6	6	1	7	4	6	6	6	6	6	6	4	31	6	5.5	6	3	1	1.875	4.222222222	4.333333333	2.5	3.3	5.909090909
R_9XBm7tc9w8RjkDr	2	Adrian	3	0	6	3	6	3	5	2	6	6	6	6	4	4	4	24	7	5.5	6	2	1	3.75	3.222222222	4	2.25	3.5	4.909090909
R_9XBm7tc9w8RjkDr	2	Alex	3	0	5	4	4	5	3	2	7	7	5	7	5	3	4	24	7	5.5	6	2	1	3.75	3.222222222	4	2.25	3.5	4.727272727
R_9XBm7tc9w8RjkDr	2	Blair	0	3	5	5	3	4	4	2	7	5	4	7	4	5	4	24	7	5.5	6	2	1	3.75	3.222222222	4	2.25	3.5	4.636363636
R_9XBm7tc9w8RjkDr	2	C.J.	0	4	5	4	4	4	4	4	5	3	4	5	4	7	4	24	7	5.5	6	2	1	3.75	3.222222222	4	2.25	3.5	4.454545455
R_9XBm7tc9w8RjkDr	2	Cameron	0	2	6	6	6	2	6	2	6	6	6	6	6	6	4	24	7	5.5	6	2	1	3.75	3.222222222	4	2.25	3.5	5.636363636
R_9XBm7tc9w8RjkDr	2	Chris	0	0	4	2	4	4	4	2	4	4	4	4	4	2	4	24	7	5.5	6	2	1	3.75	3.222222222	4	2.25	3.5	3.454545455
R_9XBm7tc9w8RjkDr	2	Jamie	0	0	6	6	6	2	6	2	6	6	6	6	6	6	4	24	7	5.5	6	2	1	3.75	3.222222222	4	2.25	3.5	5.636363636
R_9XBm7tc9w8RjkDr	2	Jessie	0	3	6	2	6	2	6	2	6	6	6	6	6	6	4	24	7	5.5	6	2	1	3.75	3.222222222	4	2.25	3.5	5.272727273
R_9XBm7tc9w8RjkDr	2	Jordan	0	0	4	2	4	3	5	2	4	4	2	4	3	3	4	24	7	5.5	6	2	1	3.75	3.222222222	4	2.25	3.5	3.363636364
R_9XBm7tc9w8RjkDr	2	Pat	2	0	6	6	6	2	6	2	6	6	6	6	6	6	4	24	7	5.5	6	2	1	3.75	3.222222222	4	2.25	3.5	5.636363636
R_9XBm7tc9w8RjkDr	2	Sam	2	0	6	5	5	4	4	2	7	7	7	7	7	5	4	24	7	5.5	6	2	1	3.75	3.222222222	4	2.25	3.5	5.636363636
R_9XBm7tc9w8RjkDr	2	Taylor	0	0	6	4	6	2	6	2	6	6	6	6	6	6	4	24	7	5.5	6	2	1	3.75	3.222222222	4	2.25	3.5	5.454545455
R_9YoPN4YoOmzFWDj	3	Adrian	0	0	4	3	3	3	5	4	4	5	6	5	5	4	1	25	5	2.75	5		2	3.125	3	2.777777778	2.625	3	4.363636364
R_9YoPN4YoOmzFWDj	3	Alex	0	0	3	3	4	5	3	5	6	6	5	5	3	3	1	25	5	2.75	5		2	3.125	3	2.777777778	2.625	3	4.181818182
R_9YoPN4YoOmzFWDj	3	Blair	2	0	4	4	3	2	6	2	2	3	3	4	4	3	1	25	5	2.75	5		2	3.125	3	2.777777778	2.625	3	3.454545455
R_9YoPN4YoOmzFWDj	3	C.J.	2	0	4	3	4	4	4	5	5	6	6	5	4	3	1	25	5	2.75	5		2	3.125	3	2.777777778	2.625	3	4.454545455
R_9YoPN4YoOmzFWDj	3	Cameron	3	0	3	3	2	4	4	4	5	6	6	5	4	4	1	25	5	2.75	5		2	3.125	3	2.777777778	2.625	3	4.181818182
R_9YoPN4YoOmzFWDj	3	Chris	0	3	5	4	4	3	5	3	4	2	2	2	1	2	1	25	5	2.75	5		2	3.125	3	2.777777778	2.625	3	3.090909091
R_9YoPN4YoOmzFWDj	3	Jamie	0	3	4	4	3	4	4	5	5	6	5	2	3	4	1	25	5	2.75	5		2	3.125	3	2.777777778	2.625	3	4.090909091
R_9YoPN4YoOmzFWDj	3	Jessie	2	0	3	3	2	4	4	5	6	6	5	3	2	2	1	25	5	2.75	5		2	3.125	3	2.777777778	2.625	3	3.727272727
R_9YoPN4YoOmzFWDj	3	Jordan	0	3	3	4	4	5	3	4	4	3	5	5	5	4	1	25	5	2.75	5		2	3.125	3	2.777777778	2.625	3	4
R_9YoPN4YoOmzFWDj	3	Pat	0	0	5	5	5	4	4	5	5	4	4	3	3	4	1	25	5	2.75	5		2	3.125	3	2.777777778	2.625	3	4.272727273
R_9YoPN4YoOmzFWDj	3	Sam	0	0	5	6	4	6	2	4	3	2	2	3	3	3	1	25	5	2.75	5		2	3.125	3	2.777777778	2.625	3	3.363636364
R_9YoPN4YoOmzFWDj	3	Taylor	0	4	4	2	3	2	6	3	5	4	2	4	4	4	1	25	5	2.75	5		2	3.125	3	2.777777778	2.625	3	3.727272727
R_9zcbLGHkXR8eqPz	1	Adrian	0	2	6	6	5	2	6	3	6	6	6	6	6	6	2	37	6	4.5	6	2	1	3.125	3.555555556	4.888888889	2.25	3.9	5.636363636
R_9zcbLGHkXR8eqPz	1	Alex	0	3	3	3	4	4	4	4	5	4	4	4	4	2	2	37	6	4.5	6	2	1	3.125	3.555555556	4.888888889	2.25	3.9	3.727272727
R_9zcbLGHkXR8eqPz	1	Blair	0	0	5	5	5	2	6	3	6	6	6	6	5	5	2	37	6	4.5	6	2	1	3.125	3.555555556	4.888888889	2.25	3.9	5.272727273
R_9zcbLGHkXR8eqPz	1	C.J.	0	0	6	5	5	2	6	3	6	6	6	6	6	6	2	37	6	4.5	6	2	1	3.125	3.555555556	4.888888889	2.25	3.9	5.545454545
R_9zcbLGHkXR8eqPz	1	Cameron	0	0	5	3	6	3	5	6	5	5	6	5	5	6	2	37	6	4.5	6	2	1	3.125	3.555555556	4.888888889	2.25	3.9	5.181818182
R_9zcbLGHkXR8eqPz	1	Chris	2	0	5	3	5	1	7	2	6	6	6	6	6	6	2	37	6	4.5	6	2	1	3.125	3.555555556	4.888888889	2.25	3.9	5.272727273
R_9zcbLGHkXR8eqPz	1	Jamie	2	0	2	2	3	5	3	2	5	3	2	5	5	2	2	37	6	4.5	6	2	1	3.125	3.555555556	4.888888889	2.25	3.9	3.090909091
R_9zcbLGHkXR8eqPz	1	Jessie	0	0	5	3	5	5	3	5	6	6	6	6	6	6	2	37	6	4.5	6	2	1	3.125	3.555555556	4.888888889	2.25	3.9	5.181818182
R_9zcbLGHkXR8eqPz	1	Jordan	3	0	3	3	4	6	2	2	6	6	4	5	5	2	2	37	6	4.5	6	2	1	3.125	3.555555556	4.888888889	2.25	3.9	3.818181818
R_9zcbLGHkXR8eqPz	1	Pat	0	2	2	2	5	5	3	2	5	5	5	6	6	6	2	37	6	4.5	6	2	1	3.125	3.555555556	4.888888889	2.25	3.9	4.272727273
R_9zcbLGHkXR8eqPz	1	Sam	1	4	5	6	6	3	5	5	6	6	6	6	6	6	2	37	6	4.5	6	2	1	3.125	3.555555556	4.888888889	2.25	3.9	5.727272727
R_9zcbLGHkXR8eqPz	1	Taylor	4	0	6	5	6	2	6	3	6	6	6	6	6	6	2	37	6	4.5	6	2	1	3.125	3.555555556	4.888888889	2.25	3.9	5.636363636
R_a2Z9WYBSXfcDON7	3	Adrian	0	0	6	5	5	4	4	4	5	5	6	6	6	6	2	62	6	2.75	6			3.625	4	4.666666667	2	3.9	5.272727273
R_a2Z9WYBSXfcDON7	3	Alex	0	0	3	3	3	4	4	3	6	4	3	3	4	5	2	62	6	2.75	6			3.625	4	4.666666667	2	3.9	3.727272727
R_a2Z9WYBSXfcDON7	3	Blair	2	0	4	4	5	4	4	3	6	4	3	4	4	5	2	62	6	2.75	6			3.625	4	4.666666667	2	3.9	4.181818182
R_a2Z9WYBSXfcDON7	3	C.J.	2	0	5	4	4	4	4	3	6	3	3	4	4	5	2	62	6	2.75	6			3.625	4	4.666666667	2	3.9	4.090909091
R_a2Z9WYBSXfcDON7	3	Cameron	3	0	6	5	5	4	4	4	5	5	5	5	5	5	2	62	6	2.75	6			3.625	4	4.666666667	2	3.9	4.909090909
R_a2Z9WYBSXfcDON7	3	Chris	0	3	3	2	3	5	3	2	6	6	3	4	6	3	2	62	6	2.75	6			3.625	4	4.666666667	2	3.9	3.727272727
R_a2Z9WYBSXfcDON7	3	Jamie	0	3	5	5	5	4	4	4	5	5	5	5	5	5	2	62	6	2.75	6			3.625	4	4.666666667	2	3.9	4.818181818
R_a2Z9WYBSXfcDON7	3	Jessie	2	0	4	2	6	3	5	5	5	4	2	4	6	6	2	62	6	2.75	6			3.625	4	4.666666667	2	3.9	4.454545455
R_a2Z9WYBSXfcDON7	3	Jordan	0	3	3	2	4	4	4	4	5	5	3	4	5	5	2	62	6	2.75	6			3.625	4	4.666666667	2	3.9	4
R_a2Z9WYBSXfcDON7	3	Pat	0	0	5	4	4	4	4	3	6	6	4	5	5	6	2	62	6	2.75	6			3.625	4	4.666666667	2	3.9	4.727272727
R_a2Z9WYBSXfcDON7	3	Sam	0	0	4	3	6	4	4	4	6	6	5	5	5	6	2	62	6	2.75	6			3.625	4	4.666666667	2	3.9	4.909090909
R_a2Z9WYBSXfcDON7	3	Taylor	0	4	6	5	6	3	5	3	5	5	5	5	5	5	2	62	6	2.75	6			3.625	4	4.666666667	2	3.9	5
R_a94DkKnjREeLHpP	2	Adrian	3	0	6	5	7	2	6	4	7	7	7	7	7	6	4	32	6	1.75	5	3	1	4.5	3.666666667	2.777777778	1.625	4.5	6.272727273
R_a94DkKnjREeLHpP	2	Alex	3	0	4	5	4	2	6	3	5	3	5	5	5	3	4	32	6	1.75	5	3	1	4.5	3.666666667	2.777777778	1.625	4.5	4.363636364
R_a94DkKnjREeLHpP	2	Blair	0	3	4	1	3	2	6	2	5	5	5	5	3	2	4	32	6	1.75	5	3	1	4.5	3.666666667	2.777777778	1.625	4.5	3.727272727
R_a94DkKnjREeLHpP	2	C.J.	0	4	5	3	5	5	3	3	5	5	3	5	5	3	4	32	6	1.75	5	3	1	4.5	3.666666667	2.777777778	1.625	4.5	4.090909091
R_a94DkKnjREeLHpP	2	Cameron	0	2	3	3	7	3	5	5	5	5	5	5	6	6	4	32	6	1.75	5	3	1	4.5	3.666666667	2.777777778	1.625	4.5	5
R_a94DkKnjREeLHpP	2	Chris	0	0	5	2	5	5	3	5	6	6	6	6	7	7	4	32	6	1.75	5	3	1	4.5	3.666666667	2.777777778	1.625	4.5	5.272727273
R_a94DkKnjREeLHpP	2	Jamie	0	0	3	2	5	6	2	3	5	5	3	5	3	5	4	32	6	1.75	5	3	1	4.5	3.666666667	2.777777778	1.625	4.5	3.727272727
R_a94DkKnjREeLHpP	2	Jessie	0	3	3	2	5	3	5	5	5	5	2	3	4	4	4	32	6	1.75	5	3	1	4.5	3.666666667	2.777777778	1.625	4.5	3.909090909
R_a94DkKnjREeLHpP	2	Jordan	0	0	3	3	5	3	5	5	5	6	5	5	5	5	4	32	6	1.75	5	3	1	4.5	3.666666667	2.777777778	1.625	4.5	4.727272727
R_a94DkKnjREeLHpP	2	Pat	2	0	6	5	6	5	3	3	6	6	6	6	6	6	4	32	6	1.75	5	3	1	4.5	3.666666667	2.777777778	1.625	4.5	5.363636364
R_a94DkKnjREeLHpP	2	Sam	2	0	5	3	7	2	6	7	6	7	7	6	6	3	4	32	6	1.75	5	3	1	4.5	3.666666667	2.777777778	1.625	4.5	5.727272727
R_a94DkKnjREeLHpP	2	Taylor	0	0	3	3	5	2	6	5	3	5	3	3	5	6	4	32	6	1.75	5	3	1	4.5	3.666666667	2.777777778	1.625	4.5	4.272727273
R_aagmdJoIGLriHzL	1	Adrian	0	2	6	5	7	3	5	4	6	7	6	6	5	5	5	35	5	2.75	6	3	1	3	4.333333333	4	1.875	4.7	5.636363636
R_aagmdJoIGLriHzL	1	Alex	0	3	4	3	4	5	3	3	4	4	4	4	3	3	5	35	5	2.75	6	3	1	3	4.333333333	4	1.875	4.7	3.545454545
R_aagmdJoIGLriHzL	1	Blair	0	0	5	3	4	5	3	3	5	2	2	5	3	5	5	35	5	2.75	6	3	1	3	4.333333333	4	1.875	4.7	3.636363636
R_aagmdJoIGLriHzL	1	C.J.	0	0	6	4	3	4	4	4	6	2	3	6	5	5	5	35	5	2.75	6	3	1	3	4.333333333	4	1.875	4.7	4.363636364
R_aagmdJoIGLriHzL	1	Cameron	0	0	5	4	5	3	5	4	6	6	6	6	5	4	5	35	5	2.75	6	3	1	3	4.333333333	4	1.875	4.7	5.090909091
R_aagmdJoIGLriHzL	1	Chris	2	0	5	2	4	5	3	3	5	5	4	5	3	1	5	35	5	2.75	6	3	1	3	4.333333333	4	1.875	4.7	3.636363636
R_aagmdJoIGLriHzL	1	Jamie	2	0	6	5	6	3	5	4	6	6	6	6	6	4	5	35	5	2.75	6	3	1	3	4.333333333	4	1.875	4.7	5.454545455
R_aagmdJoIGLriHzL	1	Jessie	0	0	6	3	4	4	4	4	6	5	5	5	5	5	5	35	5	2.75	6	3	1	3	4.333333333	4	1.875	4.7	4.727272727
R_aagmdJoIGLriHzL	1	Jordan	3	0	6	5	4	4	4	3	5	4	5	5	4	3	5	35	5	2.75	6	3	1	3	4.333333333	4	1.875	4.7	4.363636364
R_aagmdJoIGLriHzL	1	Pat	0	2	6	5	5	3	5	3	6	5	5	6	5	6	5	35	5	2.75	6	3	1	3	4.333333333	4	1.875	4.7	5.181818182
R_aagmdJoIGLriHzL	1	Sam	1	4	6	3	5	4	4	3	7	6	6	7	5	4	5	35	5	2.75	6	3	1	3	4.333333333	4	1.875	4.7	5.090909091
R_aagmdJoIGLriHzL	1	Taylor	4	0	6	5	6	3	5	4	5	6	6	6	5	5	5	35	5	2.75	6	3	1	3	4.333333333	4	1.875	4.7	5.363636364
R_aeOEMCGjXqWQ1kV	2	Adrian	3	0	5	4	5	4	4	4	6	5	5	5	5	4	5	43	7	5.5	6	4	1	3	3.222222222	3.777777778	3.125	3.9	4.727272727
R_aeOEMCGjXqWQ1kV	2	Alex	3	0	3	2	2	5	3	2	5	3	3	3	3	3	5	43	7	5.5	6	4	1	3	3.222222222	3.777777778	3.125	3.9	2.909090909
R_aeOEMCGjXqWQ1kV	2	Blair	0	3	3	3	5	4	4	3	5	4	4	5	4	5	5	43	7	5.5	6	4	1	3	3.222222222	3.777777778	3.125	3.9	4.090909091
R_aeOEMCGjXqWQ1kV	2	C.J.	0	4	3	2	2	5	3	2	2	2	2	2	2	2	5	43	7	5.5	6	4	1	3	3.222222222	3.777777778	3.125	3.9	2.181818182
R_aeOEMCGjXqWQ1kV	2	Cameron	0	2	3	3	5	4	4	3	5	5	5	5	5	4	5	43	7	5.5	6	4	1	3	3.222222222	3.777777778	3.125	3.9	4.272727273
R_aeOEMCGjXqWQ1kV	2	Chris	0	0	2	2	4	4	4	2	4	4	3	3	4	3	5	43	7	5.5	6	4	1	3	3.222222222	3.777777778	3.125	3.9	3.181818182
R_aeOEMCGjXqWQ1kV	2	Jamie	0	0	5	5	4	4	4	4	5	5	5	5	5	5	5	43	7	5.5	6	4	1	3	3.222222222	3.777777778	3.125	3.9	4.727272727
R_aeOEMCGjXqWQ1kV	2	Jessie	0	3	2	2	3	5	3	4	5	4	3	5	5	3	5	43	7	5.5	6	4	1	3	3.222222222	3.777777778	3.125	3.9	3.545454545
R_aeOEMCGjXqWQ1kV	2	Jordan	0	0	4	3	5	3	5	4	5	5	5	5	5	5	5	43	7	5.5	6	4	1	3	3.222222222	3.777777778	3.125	3.9	4.636363636
R_aeOEMCGjXqWQ1kV	2	Pat	2	0	4	3	4	5	3	3	5	4	4	5	4	5	5	43	7	5.5	6	4	1	3	3.222222222	3.777777778	3.125	3.9	4
R_aeOEMCGjXqWQ1kV	2	Sam	2	0	4	4	5	4	4	4	5	5	5	5	5	5	5	43	7	5.5	6	4	1	3	3.222222222	3.777777778	3.125	3.9	4.636363636
R_aeOEMCGjXqWQ1kV	2	Taylor	0	0	5	4	6	2	6	5	5	5	5	5	5	5	5	43	7	5.5	6	4	1	3	3.222222222	3.777777778	3.125	3.9	5.090909091
R_aXD5H4oXptdDAfH	2	Adrian	3	0	6	4	5	6	2	1	7	7	4	6	4	2	5	30	6	2.5	7	2	1	3.75	4.333333333	4.111111111	2.375	2.8	4.363636364
R_aXD5H4oXptdDAfH	2	Alex	3	0	6	3	2	3	5	1	7	7	4	5	4	2	5	30	6	2.5	7	2	1	3.75	4.333333333	4.111111111	2.375	2.8	4.181818182
R_aXD5H4oXptdDAfH	2	Blair	0	3	5	2	1	6	2	1	7	2	1	6	1	3	5	30	6	2.5	7	2	1	3.75	4.333333333	4.111111111	2.375	2.8	2.818181818
R_aXD5H4oXptdDAfH	2	C.J.	0	4	4	2	3	6	2	2	6	5	3	4	4	4	5	30	6	2.5	7	2	1	3.75	4.333333333	4.111111111	2.375	2.8	3.545454545
R_aXD5H4oXptdDAfH	2	Cameron	0	2	4	4	7	1	7	7	4	6	7	5	4	5	5	30	6	2.5	7	2	1	3.75	4.333333333	4.111111111	2.375	2.8	5.454545455
R_aXD5H4oXptdDAfH	2	Chris	0	0	4	4	4	4	4	4	5	4	4	4	4	4	5	30	6	2.5	7	2	1	3.75	4.333333333	4.111111111	2.375	2.8	4.090909091
R_aXD5H4oXptdDAfH	2	Jamie	0	0	4	2	4	4	4	3	5	4	4	4	4	4	5	30	6	2.5	7	2	1	3.75	4.333333333	4.111111111	2.375	2.8	3.818181818
R_aXD5H4oXptdDAfH	2	Jessie	0	3	5	4	4	5	3	4	4	4	5	4	4	3	5	30	6	2.5	7	2	1	3.75	4.333333333	4.111111111	2.375	2.8	4
R_aXD5H4oXptdDAfH	2	Jordan	0	0	4	3	4	4	4	4	6	4	4	4	4	4	5	30	6	2.5	7	2	1	3.75	4.333333333	4.111111111	2.375	2.8	4.090909091
R_aXD5H4oXptdDAfH	2	Pat	2	0	3	3	4	6	2	1	4	4	4	4	4	2	5	30	6	2.5	7	2	1	3.75	4.333333333	4.111111111	2.375	2.8	3.181818182
R_aXD5H4oXptdDAfH	2	Sam	2	0	3	2	6	6	2	2	6	5	4	4	4	1	5	30	6	2.5	7	2	1	3.75	4.333333333	4.111111111	2.375	2.8	3.545454545
R_aXD5H4oXptdDAfH	2	Taylor	0	0	4	4	7	1	7	4	4	7	7	7	6	5	5	30	6	2.5	7	2	1	3.75	4.333333333	4.111111111	2.375	2.8	5.636363636
R_baugZFy2VpK43Od	3	Adrian	0	0	4	4	5	4	4	4	5	5	4	5	4	4	5	32	6	3.25	6	3	1	2.25	2.555555556	4.555555556	3.125	4	4.363636364
R_baugZFy2VpK43Od	3	Alex	0	0	4	4	4	4	4	4	6	4	4	4	4	4	5	32	6	3.25	6	3	1	2.25	2.555555556	4.555555556	3.125	4	4.181818182
R_baugZFy2VpK43Od	3	Blair	2	0	4	4	4	4	4	4	4	4	4	4	4	4	5	32	6	3.25	6	3	1	2.25	2.555555556	4.555555556	3.125	4	4
R_baugZFy2VpK43Od	3	C.J.	2	0	4	4	3	4	4	4	4	2	4	3	4	4	5	32	6	3.25	6	3	1	2.25	2.555555556	4.555555556	3.125	4	3.636363636
R_baugZFy2VpK43Od	3	Cameron	3	0	4	4	4	4	4	4	4	4	4	4	4	4	5	32	6	3.25	6	3	1	2.25	2.555555556	4.555555556	3.125	4	4
R_baugZFy2VpK43Od	3	Chris	0	3	4	2	3	4	4	3	4	4	4	4	3	1	5	32	6	3.25	6	3	1	2.25	2.555555556	4.555555556	3.125	4	3.272727273
R_baugZFy2VpK43Od	3	Jamie	0	3	4	4	4	4	4	4	4	4	4	4	4	4	5	32	6	3.25	6	3	1	2.25	2.555555556	4.555555556	3.125	4	4
R_baugZFy2VpK43Od	3	Jessie	2	0	4	3	3	4	4	3	4	3	3	4	4	1	5	32	6	3.25	6	3	1	2.25	2.555555556	4.555555556	3.125	4	3.272727273
R_baugZFy2VpK43Od	3	Jordan	0	3	4	4	4	4	4	4	4	3	4	4	4	4	5	32	6	3.25	6	3	1	2.25	2.555555556	4.555555556	3.125	4	3.909090909
R_baugZFy2VpK43Od	3	Pat	0	0	4	4	4	4	4	4	4	6	4	5	4	4	5	32	6	3.25	6	3	1	2.25	2.555555556	4.555555556	3.125	4	4.272727273
R_baugZFy2VpK43Od	3	Sam	0	0	4	4	5	3	5	4	5	4	5	5	4	6	5	32	6	3.25	6	3	1	2.25	2.555555556	4.555555556	3.125	4	4.636363636
R_baugZFy2VpK43Od	3	Taylor	0	4	3	2	4	4	4	4	2	4	2	4	4	4	5	32	6	3.25	6	3	1	2.25	2.555555556	4.555555556	3.125	4	3.363636364
R_bBBP4lNpG0XFW3b	2	Adrian	3	0	4	2	3	4	4	4	5	3	4	5	4	6	2	25	3	2.75	4	1	1	3	3.111111111	2.777777778	2.875	4.3	4
R_bBBP4lNpG0XFW3b	2	Alex	3	0	4	2	3	5	3	4	5	3	3	4	4	3	2	25	3	2.75	4	1	1	3	3.111111111	2.777777778	2.875	4.3	3.454545455
R_bBBP4lNpG0XFW3b	2	Blair	0	3	2	2	5	5	3	3	6	4	2	5	4	3	2	25	3	2.75	4	1	1	3	3.111111111	2.777777778	2.875	4.3	3.545454545
R_bBBP4lNpG0XFW3b	2	C.J.	0	4	4	2	4	4	4	3	6	3	2	5	4	5	2	25	3	2.75	4	1	1	3	3.111111111	2.777777778	2.875	4.3	3.818181818
R_bBBP4lNpG0XFW3b	2	Cameron	0	2	6	5	5	3	5	5	5	6	6	6	4	6	2	25	3	2.75	4	1	1	3	3.111111111	2.777777778	2.875	4.3	5.363636364
R_bBBP4lNpG0XFW3b	2	Chris	0	0	4	3	5	4	4	4	2	3	3	3	4	6	2	25	3	2.75	4	1	1	3	3.111111111	2.777777778	2.875	4.3	3.727272727
R_bBBP4lNpG0XFW3b	2	Jamie	0	0	5	3	5	4	4	3	5	4	3	5	4	6	2	25	3	2.75	4	1	1	3	3.111111111	2.777777778	2.875	4.3	4.272727273
R_bBBP4lNpG0XFW3b	2	Jessie	0	3	5	2	5	3	5	3	5	5	6	5	4	6	2	25	3	2.75	4	1	1	3	3.111111111	2.777777778	2.875	4.3	4.636363636
R_bBBP4lNpG0XFW3b	2	Jordan	0	0	6	5	5	5	3	5	6	6	6	6	4	6	2	25	3	2.75	4	1	1	3	3.111111111	2.777777778	2.875	4.3	5.272727273
R_bBBP4lNpG0XFW3b	2	Pat	2	0	5	2	2	2	6	4	5	5	4	5	4	5	2	25	3	2.75	4	1	1	3	3.111111111	2.777777778	2.875	4.3	4.272727273
R_bBBP4lNpG0XFW3b	2	Sam	2	0	5	5	3	4	4	4	5	6	5	6	4	6	2	25	3	2.75	4	1	1	3	3.111111111	2.777777778	2.875	4.3	4.818181818
R_bBBP4lNpG0XFW3b	2	Taylor	0	0	5	5	5	2	6	5	5	5	6	5	4	6	2	25	3	2.75	4	1	1	3	3.111111111	2.777777778	2.875	4.3	5.181818182
R_bClxgZ5XyJDfEWh	2	Adrian	3	0	5	4	5	5	3	4	5	5	5	5	5	3	2	30	3	6.25	6	3	1	3.625	3.888888889	3	2.125	3.6	4.454545455
R_bClxgZ5XyJDfEWh	2	Alex	3	0	5	5	5	5	3	4	7	5	6	6	5	3	2	30	3	6.25	6	3	1	3.625	3.888888889	3	2.125	3.6	4.909090909
R_bClxgZ5XyJDfEWh	2	Blair	0	3	6	6	4	3	5	4	6	4	5	6	5	5	2	30	3	6.25	6	3	1	3.625	3.888888889	3	2.125	3.6	5.090909091
R_bClxgZ5XyJDfEWh	2	C.J.	0	4	6	6	4	4	4	4	5	4	4	5	5	4	2	30	3	6.25	6	3	1	3.625	3.888888889	3	2.125	3.6	4.636363636
R_bClxgZ5XyJDfEWh	2	Cameron	0	2	5	4	6	3	5	3	6	6	6	6	6	4	2	30	3	6.25	6	3	1	3.625	3.888888889	3	2.125	3.6	5.181818182
R_bClxgZ5XyJDfEWh	2	Chris	0	0	5	6	5	3	5	4	5	5	5	5	5	5	2	30	3	6.25	6	3	1	3.625	3.888888889	3	2.125	3.6	5
R_bClxgZ5XyJDfEWh	2	Jamie	0	0	6	6	5	3	5	4	5	5	5	5	5	5	2	30	3	6.25	6	3	1	3.625	3.888888889	3	2.125	3.6	5.090909091
R_bClxgZ5XyJDfEWh	2	Jessie	0	3	5	2	5	3	5	4	5	5	4	5	6	6	2	30	3	6.25	6	3	1	3.625	3.888888889	3	2.125	3.6	4.727272727
R_bClxgZ5XyJDfEWh	2	Jordan	0	0	5	4	5	3	5	4	5	5	5	5	5	5	2	30	3	6.25	6	3	1	3.625	3.888888889	3	2.125	3.6	4.818181818
R_bClxgZ5XyJDfEWh	2	Pat	2	0	7	7	5	3	5	4	6	5	6	7	6	5	2	30	3	6.25	6	3	1	3.625	3.888888889	3	2.125	3.6	5.727272727
R_bClxgZ5XyJDfEWh	2	Sam	2	0	6	4	6	3	5	4	6	6	6	6	6	6	2	30	3	6.25	6	3	1	3.625	3.888888889	3	2.125	3.6	5.545454545
R_bClxgZ5XyJDfEWh	2	Taylor	0	0	4	3	7	2	6	4	4	6	6	4	6	7	2	30	3	6.25	6	3	1	3.625	3.888888889	3	2.125	3.6	5.181818182
R_byznyeGMxOn4VRb	3	Adrian	0	0	5	5	5	3	5	5	5	5	5	5	5	5	5	43	6	6.25	5	2	1	4	2.666666667	4.444444444	3	3.8	5
R_byznyeGMxOn4VRb	3	Alex	0	0	3	3	3	5	3	3	5	3	5	5	5	5	5	43	6	6.25	5	2	1	4	2.666666667	4.444444444	3	3.8	3.909090909
R_byznyeGMxOn4VRb	3	Blair	2	0	6	6	5	6	2	3	5	5	6	6	5	3	5	43	6	6.25	5	2	1	4	2.666666667	4.444444444	3	3.8	4.727272727
R_byznyeGMxOn4VRb	3	C.J.	2	0	5	5	5	5	3	3	5	5	5	5	5	5	5	43	6	6.25	5	2	1	4	2.666666667	4.444444444	3	3.8	4.636363636
R_byznyeGMxOn4VRb	3	Cameron	3	0	4	3	4	4	4	4	5	5	4	5	4	5	5	43	6	6.25	5	2	1	4	2.666666667	4.444444444	3	3.8	4.272727273
R_byznyeGMxOn4VRb	3	Chris	0	3	5	5	5	3	5	4	5	5	5	5	5	5	5	43	6	6.25	5	2	1	4	2.666666667	4.444444444	3	3.8	4.909090909
R_byznyeGMxOn4VRb	3	Jamie	0	3	5	5	5	3	5	5	5	5	5	5	5	5	5	43	6	6.25	5	2	1	4	2.666666667	4.444444444	3	3.8	5
R_byznyeGMxOn4VRb	3	Jessie	2	0	2	2	5	3	5	3	3	3	2	5	5	5	5	43	6	6.25	5	2	1	4	2.666666667	4.444444444	3	3.8	3.636363636
R_byznyeGMxOn4VRb	3	Jordan	0	3	3	3	3	5	3	3	4	4	4	4	4	5	5	43	6	6.25	5	2	1	4	2.666666667	4.444444444	3	3.8	3.636363636
R_byznyeGMxOn4VRb	3	Pat	0	0	5	5	5	3	5	3	5	5	5	5	5	5	5	43	6	6.25	5	2	1	4	2.666666667	4.444444444	3	3.8	4.818181818
R_byznyeGMxOn4VRb	3	Sam	0	0	5	5	6	3	5	5	5	5	5	5	5	5	5	43	6	6.25	5	2	1	4	2.666666667	4.444444444	3	3.8	5.090909091
R_byznyeGMxOn4VRb	3	Taylor	0	4	2	2	6	2	6	5	3	3	2	2	2	5	5	43	6	6.25	5	2	1	4	2.666666667	4.444444444	3	3.8	3.454545455
R_cBfQYLKae2IoXg9	3	Adrian	0	0	3	2	5	4	4	4	5	5	5	5	5	5	3	30	5	3.75	5			2.25	3.222222222	2.555555556	3.625	4.5	4.363636364
R_cBfQYLKae2IoXg9	3	Alex	0	0	3	3	4	5	3	3	5	4	3	3	3	3	3	30	5	3.75	5			2.25	3.222222222	2.555555556	3.625	4.5	3.363636364
R_cBfQYLKae2IoXg9	3	Blair	2	0	4	3	4	5	3	3	5	4	4	5	5	4	3	30	5	3.75	5			2.25	3.222222222	2.555555556	3.625	4.5	4
R_cBfQYLKae2IoXg9	3	C.J.	2	0	6	6	4	4	4	4	5	4	5	5	4	4	3	30	5	3.75	5			2.25	3.222222222	2.555555556	3.625	4.5	4.636363636
R_cBfQYLKae2IoXg9	3	Cameron	3	0	2	2	4	4	4	4	4	5	4	4	5	5	3	30	5	3.75	5			2.25	3.222222222	2.555555556	3.625	4.5	3.909090909
R_cBfQYLKae2IoXg9	3	Chris	0	3	2	2	4	3	5	5	4	5	3	3	5	6	3	30	5	3.75	5			2.25	3.222222222	2.555555556	3.625	4.5	4
R_cBfQYLKae2IoXg9	3	Jamie	0	3	5	5	4	5	3	3	5	4	5	5	4	5	3	30	5	3.75	5			2.25	3.222222222	2.555555556	3.625	4.5	4.363636364
R_cBfQYLKae2IoXg9	3	Jessie	2	0	2	1	3	4	4	4	3	3	3	4	5	4	3	30	5	3.75	5			2.25	3.222222222	2.555555556	3.625	4.5	3.272727273
R_cBfQYLKae2IoXg9	3	Jordan	0	3	5	5	4	4	4	4	5	3	4	5	4	4	3	30	5	3.75	5			2.25	3.222222222	2.555555556	3.625	4.5	4.272727273
R_cBfQYLKae2IoXg9	3	Pat	0	0	5	4	5	4	4	4	5	5	5	6	6	5	3	30	5	3.75	5			2.25	3.222222222	2.555555556	3.625	4.5	4.909090909
R_cBfQYLKae2IoXg9	3	Sam	0	0	5	4	6	3	5	4	6	6	6	6	6	5	3	30	5	3.75	5			2.25	3.222222222	2.555555556	3.625	4.5	5.363636364
R_cBfQYLKae2IoXg9	3	Taylor	0	4	3	2	5	3	5	5	4	5	4	4	4	5	3	30	5	3.75	5			2.25	3.222222222	2.555555556	3.625	4.5	4.181818182
R_cCFrCTQ0tu5zuol	3	Adrian	0	0	3	2	2	3	5	2	6	3	3	6	3	4	2	57	6	3.25	6	2	1	3.5	4.444444444	4.444444444	1.375	4.5	3.545454545
R_cCFrCTQ0tu5zuol	3	Alex	0	0	5	3	2	2	6	2	6	3	3	6	3	4	2	57	6	3.25	6	2	1	3.5	4.444444444	4.444444444	1.375	4.5	3.909090909
R_cCFrCTQ0tu5zuol	3	Blair	2	0	3	1	2	5	3	1	5	1	2	5	2	5	2	57	6	3.25	6	2	1	3.5	4.444444444	4.444444444	1.375	4.5	2.727272727
R_cCFrCTQ0tu5zuol	3	C.J.	2	0	2	2	1	6	2	1	5	2	2	3	1	5	2	57	6	3.25	6	2	1	3.5	4.444444444	4.444444444	1.375	4.5	2.363636364
R_cCFrCTQ0tu5zuol	3	Cameron	3	0	6	6	6	2	6	4	6	6	6	6	4	6	2	57	6	3.25	6	2	1	3.5	4.444444444	4.444444444	1.375	4.5	5.636363636
R_cCFrCTQ0tu5zuol	3	Chris	0	3	5	2	5	2	6	2	6	3	4	6	4	5	2	57	6	3.25	6	2	1	3.5	4.444444444	4.444444444	1.375	4.5	4.363636364
R_cCFrCTQ0tu5zuol	3	Jamie	0	3	3	2	5	2	6	2	6	5	2	6	4	5	2	57	6	3.25	6	2	1	3.5	4.444444444	4.444444444	1.375	4.5	4.181818182
R_cCFrCTQ0tu5zuol	3	Jessie	2	0	3	2	5	2	6	2	6	3	3	6	4	5	2	57	6	3.25	6	2	1	3.5	4.444444444	4.444444444	1.375	4.5	4.090909091
R_cCFrCTQ0tu5zuol	3	Jordan	0	3	5	2	3	5	3	3	5	2	3	5	2	5	2	57	6	3.25	6	2	1	3.5	4.444444444	4.444444444	1.375	4.5	3.454545455
R_cCFrCTQ0tu5zuol	3	Pat	0	0	3	2	3	3	5	2	6	3	3	6	3	5	2	57	6	3.25	6	2	1	3.5	4.444444444	4.444444444	1.375	4.5	3.727272727
R_cCFrCTQ0tu5zuol	3	Sam	0	0	5	3	2	2	6	3	6	5	5	6	4	6	2	57	6	3.25	6	2	1	3.5	4.444444444	4.444444444	1.375	4.5	4.636363636
R_cCFrCTQ0tu5zuol	3	Taylor	0	4	6	5	6	3	5	4	6	5	6	6	4	6	2	57	6	3.25	6	2	1	3.5	4.444444444	4.444444444	1.375	4.5	5.363636364
R_cFRM2PG18akVLDL	1	Adrian	0	2	4	3	5	4	4	3	6	6	6	6	5	4	4	24	4	2.5	6	4	1	3.375	3.777777778	4.111111111	2.5	3.8	4.727272727
R_cFRM2PG18akVLDL	1	Alex	0	3	5	3	6	5	3	3	5	5	5	5	5	4	4	24	4	2.5	6	4	1	3.375	3.777777778	4.111111111	2.5	3.8	4.454545455
R_cFRM2PG18akVLDL	1	Blair	0	0	3	2	4	4	4	3	5	3	3	3	2	4	4	24	4	2.5	6	4	1	3.375	3.777777778	4.111111111	2.5	3.8	3.272727273
R_cFRM2PG18akVLDL	1	C.J.	0	0	4	3	3	2	6	4	5	4	3	3	3	6	4	24	4	2.5	6	4	1	3.375	3.777777778	4.111111111	2.5	3.8	4
R_cFRM2PG18akVLDL	1	Cameron	0	0	6	6	6	2	6	6	6	6	6	6	6	6	4	24	4	2.5	6	4	1	3.375	3.777777778	4.111111111	2.5	3.8	6
R_cFRM2PG18akVLDL	1	Chris	2	0	3	2	4	4	4	3	5	4	4	4	4	4	4	24	4	2.5	6	4	1	3.375	3.777777778	4.111111111	2.5	3.8	3.727272727
R_cFRM2PG18akVLDL	1	Jamie	2	0	3	3	4	4	4	4	5	4	4	4	4	4	4	24	4	2.5	6	4	1	3.375	3.777777778	4.111111111	2.5	3.8	3.909090909
R_cFRM2PG18akVLDL	1	Jessie	0	0	6	6	6	2	6	5	6	6	6	6	6	6	4	24	4	2.5	6	4	1	3.375	3.777777778	4.111111111	2.5	3.8	5.909090909
R_cFRM2PG18akVLDL	1	Jordan	3	0	3	2	4	4	4	4	5	4	4	4	4	2	4	24	4	2.5	6	4	1	3.375	3.777777778	4.111111111	2.5	3.8	3.636363636
R_cFRM2PG18akVLDL	1	Pat	0	2	3	2	4	4	4	3	6	5	4	4	4	3	4	24	4	2.5	6	4	1	3.375	3.777777778	4.111111111	2.5	3.8	3.818181818
R_cFRM2PG18akVLDL	1	Sam	1	4	5	3	6	4	4	4	5	5	5	5	5	4	4	24	4	2.5	6	4	1	3.375	3.777777778	4.111111111	2.5	3.8	4.636363636
R_cFRM2PG18akVLDL	1	Taylor	4	0	5	5	5	3	5	6	6	6	6	6	6	5	4	24	4	2.5	6	4	1	3.375	3.777777778	4.111111111	2.5	3.8	5.545454545
R_ctEPpuorYjtCYux	1	Adrian	0	2	5	6	6	5	3	3	6	5	5	6	5	5	4	30	2	1.25	6	4	1	1.625	3.555555556	4	2.25	3.1	5
R_ctEPpuorYjtCYux	1	Alex	0	3	2	2	3	6	2	2	5	3	2	4	3	3	4	30	2	1.25	6	4	1	1.625	3.555555556	4	2.25	3.1	2.818181818
R_ctEPpuorYjtCYux	1	Blair	0	0	2	2	5	7	1	2	5	3	2	4	4	5	4	30	2	1.25	6	4	1	1.625	3.555555556	4	2.25	3.1	3.181818182
R_ctEPpuorYjtCYux	1	C.J.	0	0	2	2	5	6	2	2	6	5	2	6	4	5	4	30	2	1.25	6	4	1	1.625	3.555555556	4	2.25	3.1	3.727272727
R_ctEPpuorYjtCYux	1	Cameron	0	0	6	5	6	2	6	3	6	6	6	6	6	6	4	30	2	1.25	6	4	1	1.625	3.555555556	4	2.25	3.1	5.636363636
R_ctEPpuorYjtCYux	1	Chris	2	0	2	2	5	6	2	2	5	5	2	5	5	2	4	30	2	1.25	6	4	1	1.625	3.555555556	4	2.25	3.1	3.363636364
R_ctEPpuorYjtCYux	1	Jamie	2	0	3	3	5	6	2	2	5	6	3	5	5	5	4	30	2	1.25	6	4	1	1.625	3.555555556	4	2.25	3.1	4
R_ctEPpuorYjtCYux	1	Jessie	0	0	6	5	6	3	5	3	6	6	5	6	6	6	4	30	2	1.25	6	4	1	1.625	3.555555556	4	2.25	3.1	5.454545455
R_ctEPpuorYjtCYux	1	Jordan	3	0	3	2	5	6	2	2	6	5	4	6	5	5	4	30	2	1.25	6	4	1	1.625	3.555555556	4	2.25	3.1	4.090909091
R_ctEPpuorYjtCYux	1	Pat	0	2	5	3	6	6	2	2	5	5	3	5	5	5	4	30	2	1.25	6	4	1	1.625	3.555555556	4	2.25	3.1	4.181818182
R_ctEPpuorYjtCYux	1	Sam	1	4	6	6	6	5	3	3	6	5	6	5	5	5	4	30	2	1.25	6	4	1	1.625	3.555555556	4	2.25	3.1	5.090909091
R_ctEPpuorYjtCYux	1	Taylor	4	0	5	5	6	5	3	2	5	6	5	6	5	5	4	30	2	1.25	6	4	1	1.625	3.555555556	4	2.25	3.1	4.818181818
R_cVfuVuVrcViRQLb	1	Adrian	0	2	4	3	4	2	6	4	7	6	4	7	6	6	3	24	2	4.5	7	2	1	3.75	4.555555556	4.666666667	3	3.6	5.181818182
R_cVfuVuVrcViRQLb	1	Alex	0	3	3	1	3	6	2	1	6	4	3	4	7	3	3	24	2	4.5	7	2	1	3.75	4.555555556	4.666666667	3	3.6	3.363636364
R_cVfuVuVrcViRQLb	1	Blair	0	0	3	1	4	6	2	2	7	4	2	7	3	5	3	24	2	4.5	7	2	1	3.75	4.555555556	4.666666667	3	3.6	3.636363636
R_cVfuVuVrcViRQLb	1	C.J.	0	0	5	1	4	6	2	2	7	3	1	6	4	4	3	24	2	4.5	7	2	1	3.75	4.555555556	4.666666667	3	3.6	3.545454545
R_cVfuVuVrcViRQLb	1	Cameron	0	0	6	6	6	2	6	4	6	6	7	6	6	5	3	24	2	4.5	7	2	1	3.75	4.555555556	4.666666667	3	3.6	5.818181818
R_cVfuVuVrcViRQLb	1	Chris	2	0	4	1	4	6	2	2	5	4	4	4	4	3	3	24	2	4.5	7	2	1	3.75	4.555555556	4.666666667	3	3.6	3.363636364
R_cVfuVuVrcViRQLb	1	Jamie	2	0	5	4	4	3	5	3	6	5	5	6	5	4	3	24	2	4.5	7	2	1	3.75	4.555555556	4.666666667	3	3.6	4.727272727
R_cVfuVuVrcViRQLb	1	Jessie	0	0	7	7	7	2	6	7	7	7	7	7	6	6	3	24	2	4.5	7	2	1	3.75	4.555555556	4.666666667	3	3.6	6.727272727
R_cVfuVuVrcViRQLb	1	Jordan	3	0	5	3	5	2	6	5	6	6	5	7	5	4	3	24	2	4.5	7	2	1	3.75	4.555555556	4.666666667	3	3.6	5.181818182
R_cVfuVuVrcViRQLb	1	Pat	0	2	5	2	5	4	4	4	6	5	4	5	5	7	3	24	2	4.5	7	2	1	3.75	4.555555556	4.666666667	3	3.6	4.727272727
R_cVfuVuVrcViRQLb	1	Sam	1	4	6	6	6	5	3	5	7	6	6	6	6	7	3	24	2	4.5	7	2	1	3.75	4.555555556	4.666666667	3	3.6	5.818181818
R_cVfuVuVrcViRQLb	1	Taylor	4	0	5	5	5	3	5	6	5	6	4	4	5	3	3	24	2	4.5	7	2	1	3.75	4.555555556	4.666666667	3	3.6	4.818181818
R_dcDvvwBwNdUjs8J	1	Adrian	0	2	6	4	6	5	3	5	5	5	5	6	5	5	3	40	6	4.5	7	2	1	3	4.333333333	3.222222222	2.875	3.2	5
R_dcDvvwBwNdUjs8J	1	Alex	0	3	4	4	4	4	4	3	4	4	4	4	4	3	3	40	6	4.5	7	2	1	3	4.333333333	3.222222222	2.875	3.2	3.818181818
R_dcDvvwBwNdUjs8J	1	Blair	0	0	4	2	2	2	6	1	5	5	4	5	2	2	3	40	6	4.5	7	2	1	3	4.333333333	3.222222222	2.875	3.2	3.454545455
R_dcDvvwBwNdUjs8J	1	C.J.	0	0	4	3	4	4	4	4	5	5	5	5	5	5	3	40	6	4.5	7	2	1	3	4.333333333	3.222222222	2.875	3.2	4.454545455
R_dcDvvwBwNdUjs8J	1	Cameron	0	0	7	7	7	7	1	4	7	7	7	7	7	7	3	40	6	4.5	7	2	1	3	4.333333333	3.222222222	2.875	3.2	6.181818182
R_dcDvvwBwNdUjs8J	1	Chris	2	0	2	2	4	4	4	2	5	3	3	5	4	2	3	40	6	4.5	7	2	1	3	4.333333333	3.222222222	2.875	3.2	3.272727273
R_dcDvvwBwNdUjs8J	1	Jamie	2	0	3	3	4	3	5	2	5	4	4	4	4	5	3	40	6	4.5	7	2	1	3	4.333333333	3.222222222	2.875	3.2	3.909090909
R_dcDvvwBwNdUjs8J	1	Jessie	0	0	6	6	4	5	3	5	6	6	6	5	7	6	3	40	6	4.5	7	2	1	3	4.333333333	3.222222222	2.875	3.2	5.454545455
R_dcDvvwBwNdUjs8J	1	Jordan	3	0	5	4	4	4	4	4	5	5	5	5	5	2	3	40	6	4.5	7	2	1	3	4.333333333	3.222222222	2.875	3.2	4.363636364
R_dcDvvwBwNdUjs8J	1	Pat	0	2	4	2	4	5	3	4	5	5	5	5	5	4	3	40	6	4.5	7	2	1	3	4.333333333	3.222222222	2.875	3.2	4.181818182
R_dcDvvwBwNdUjs8J	1	Sam	1	4	3	3	6	4	4	3	6	4	4	5	4	3	3	40	6	4.5	7	2	1	3	4.333333333	3.222222222	2.875	3.2	4.090909091
R_dcDvvwBwNdUjs8J	1	Taylor	4	0	6	5	5	4	4	4	6	6	6	6	6	3	3	40	6	4.5	7	2	1	3	4.333333333	3.222222222	2.875	3.2	5.181818182
R_doqy4NNe8X3nmjb	1	Adrian	0	2	6	6	4	4	4	4	6	6	6	6	5	6	3	25	4	3	6			3.5	4.222222222	4.444444444	3.75	3.5	5.363636364
R_doqy4NNe8X3nmjb	1	Alex	0	3	4	4	4	4	4	4	5	4	4	5	4	4	3	25	4	3	6			3.5	4.222222222	4.444444444	3.75	3.5	4.181818182
R_doqy4NNe8X3nmjb	1	Blair	0	0	5	5	4	4	4	3	6	4	5	5	5	5	3	25	4	3	6			3.5	4.222222222	4.444444444	3.75	3.5	4.636363636
R_doqy4NNe8X3nmjb	1	C.J.	0	0	5	3	4	3	5	2	5	3	3	5	4	4	3	25	4	3	6			3.5	4.222222222	4.444444444	3.75	3.5	3.909090909
R_doqy4NNe8X3nmjb	1	Cameron	0	0	6	6	4	3	5	5	6	7	7	7	6	6	3	25	4	3	6			3.5	4.222222222	4.444444444	3.75	3.5	5.909090909
R_doqy4NNe8X3nmjb	1	Chris	2	0	4	3	4	4	4	4	5	4	3	5	4	4	3	25	4	3	6			3.5	4.222222222	4.444444444	3.75	3.5	4
R_doqy4NNe8X3nmjb	1	Jamie	2	0	5	6	4	4	4	4	6	7	6	6	5	6	3	25	4	3	6			3.5	4.222222222	4.444444444	3.75	3.5	5.363636364
R_doqy4NNe8X3nmjb	1	Jessie	0	0	5	4	4	3	5	3	6	5	4	5	5	4	3	25	4	3	6			3.5	4.222222222	4.444444444	3.75	3.5	4.545454545
R_doqy4NNe8X3nmjb	1	Jordan	3	0	6	5	4	4	4	4	6	7	6	6	5	4	3	25	4	3	6			3.5	4.222222222	4.444444444	3.75	3.5	5.181818182
R_doqy4NNe8X3nmjb	1	Pat	0	2	5	5	4	3	5	3	6	6	6	6	5	5	3	25	4	3	6			3.5	4.222222222	4.444444444	3.75	3.5	5.090909091
R_doqy4NNe8X3nmjb	1	Sam	1	4	5	4	4	6	2	2	6	6	5	6	5	3	3	25	4	3	6			3.5	4.222222222	4.444444444	3.75	3.5	4.363636364
R_doqy4NNe8X3nmjb	1	Taylor	4	0	5	3	4	2	6	6	5	4	2	5	4	6	3	25	4	3	6			3.5	4.222222222	4.444444444	3.75	3.5	4.545454545
R_eeq68Ebh4IqxQMd	1	Adrian	0	2	5	1	5	5	3	3	7	7	5	7	4	3	4	26	3	3.5	5		2	1.875	1.777777778	3.444444444	4.625	3.4	4.545454545
R_eeq68Ebh4IqxQMd	1	Alex	0	3	2	1	1	5	3	6	6	3	2	3	2	3	4	26	3	3.5	5		2	1.875	1.777777778	3.444444444	4.625	3.4	2.909090909
R_eeq68Ebh4IqxQMd	1	Blair	0	0	1	1	7	6	2	4	7	6	3	7	2	7	4	26	3	3.5	5		2	1.875	1.777777778	3.444444444	4.625	3.4	4.272727273
R_eeq68Ebh4IqxQMd	1	C.J.	0	0	1	1	7	2	6	2	7	7	1	7	4	7	4	26	3	3.5	5		2	1.875	1.777777778	3.444444444	4.625	3.4	4.545454545
R_eeq68Ebh4IqxQMd	1	Cameron	0	0	6	6	7	6	2	6	7	7	7	7	4	7	4	26	3	3.5	5		2	1.875	1.777777778	3.444444444	4.625	3.4	6
R_eeq68Ebh4IqxQMd	1	Chris	2	0	2	3	2	5	3	2	4	3	2	3	1	3	4	26	3	3.5	5		2	1.875	1.777777778	3.444444444	4.625	3.4	2.545454545
R_eeq68Ebh4IqxQMd	1	Jamie	2	0	6	6	5	3	5	3	7	4	5	5	2	3	4	26	3	3.5	5		2	1.875	1.777777778	3.444444444	4.625	3.4	4.636363636
R_eeq68Ebh4IqxQMd	1	Jessie	0	0	7	1	7	3	5	5	7	7	7	7	4	7	4	26	3	3.5	5		2	1.875	1.777777778	3.444444444	4.625	3.4	5.818181818
R_eeq68Ebh4IqxQMd	1	Jordan	3	0	5	5	3	5	3	3	5	3	3	4	3	2	4	26	3	3.5	5		2	1.875	1.777777778	3.444444444	4.625	3.4	3.545454545
R_eeq68Ebh4IqxQMd	1	Pat	0	2	1	1	3	5	3	2	7	6	1	5	4	3	4	26	3	3.5	5		2	1.875	1.777777778	3.444444444	4.625	3.4	3.272727273
R_eeq68Ebh4IqxQMd	1	Sam	1	4	3	2	2	5	3	3	6	6	4	3	2	1	4	26	3	3.5	5		2	1.875	1.777777778	3.444444444	4.625	3.4	3.181818182
R_eeq68Ebh4IqxQMd	1	Taylor	4	0	6	6	6	3	5	5	5	6	6	7	2	2	4	26	3	3.5	5		2	1.875	1.777777778	3.444444444	4.625	3.4	5.090909091
R_effbaZXjZJsPPVP	1	Adrian	0	2	3	3	4	4	4	4	4	4	3	4	4	4	1	32	6	5.75	6	3	1	2	3.888888889	4	2.125	2.7	3.727272727
R_effbaZXjZJsPPVP	1	Alex	0	3	3	2	4	4	4	3	5	4	4	4	4	3	1	32	6	5.75	6	3	1	2	3.888888889	4	2.125	2.7	3.636363636
R_effbaZXjZJsPPVP	1	Blair	0	0	2	2	3	4	4	4	4	3	2	4	4	4	1	32	6	5.75	6	3	1	2	3.888888889	4	2.125	2.7	3.272727273
R_effbaZXjZJsPPVP	1	C.J.	0	0	3	3	3	4	4	4	5	3	3	4	4	4	1	32	6	5.75	6	3	1	2	3.888888889	4	2.125	2.7	3.636363636
R_effbaZXjZJsPPVP	1	Cameron	0	0	5	5	5	4	4	4	5	5	6	5	4	4	1	32	6	5.75	6	3	1	2	3.888888889	4	2.125	2.7	4.727272727
R_effbaZXjZJsPPVP	1	Chris	2	0	3	3	3	4	4	4	4	3	3	4	4	4	1	32	6	5.75	6	3	1	2	3.888888889	4	2.125	2.7	3.545454545
R_effbaZXjZJsPPVP	1	Jamie	2	0	3	3	3	4	4	4	4	4	3	4	4	4	1	32	6	5.75	6	3	1	2	3.888888889	4	2.125	2.7	3.636363636
R_effbaZXjZJsPPVP	1	Jessie	0	0	3	3	3	4	4	4	4	3	3	4	4	4	1	32	6	5.75	6	3	1	2	3.888888889	4	2.125	2.7	3.545454545
R_effbaZXjZJsPPVP	1	Jordan	3	0	3	3	3	4	4	4	4	4	3	4	4	3	1	32	6	5.75	6	3	1	2	3.888888889	4	2.125	2.7	3.545454545
R_effbaZXjZJsPPVP	1	Pat	0	2	4	3	4	4	4	4	5	4	3	4	4	4	1	32	6	5.75	6	3	1	2	3.888888889	4	2.125	2.7	3.909090909
R_effbaZXjZJsPPVP	1	Sam	1	4	3	3	4	4	4	4	5	4	3	4	4	4	1	32	6	5.75	6	3	1	2	3.888888889	4	2.125	2.7	3.818181818
R_effbaZXjZJsPPVP	1	Taylor	4	0	5	5	6	4	4	5	4	5	5	4	4	4	1	32	6	5.75	6	3	1	2	3.888888889	4	2.125	2.7	4.636363636
R_eJOw0fUqWK2EQzH	1	Adrian	0	2	2	1	5	5	3	2	5	6	5	5	5	5	4	33	7	6	5	3	1	4.375	3.222222222	5	1	3.4	4
R_eJOw0fUqWK2EQzH	1	Alex	0	3	2	2	2	6	2	2	5	5	4	4	4	2	4	33	7	6	5	3	1	4.375	3.222222222	5	1	3.4	3.090909091
R_eJOw0fUqWK2EQzH	1	Blair	0	0	2	2	3	2	6	2	5	3	3	5	3	5	4	33	7	6	5	3	1	4.375	3.222222222	5	1	3.4	3.545454545
R_eJOw0fUqWK2EQzH	1	C.J.	0	0	2	2	5	2	6	2	6	4	2	5	5	6	4	33	7	6	5	3	1	4.375	3.222222222	5	1	3.4	4.090909091
R_eJOw0fUqWK2EQzH	1	Cameron	0	0	6	6	6	1	7	3	6	7	6	6	6	6	4	33	7	6	5	3	1	4.375	3.222222222	5	1	3.4	5.909090909
R_eJOw0fUqWK2EQzH	1	Chris	2	0	2	1	3	3	5	2	5	6	2	5	5	3	4	33	7	6	5	3	1	4.375	3.222222222	5	1	3.4	3.545454545
R_eJOw0fUqWK2EQzH	1	Jamie	2	0	1	1	4	1	7	1	5	3	1	3	3	4	4	33	7	6	5	3	1	4.375	3.222222222	5	1	3.4	3
R_eJOw0fUqWK2EQzH	1	Jessie	0	0	6	7	6	2	6	6	6	6	6	6	6	6	4	33	7	6	5	3	1	4.375	3.222222222	5	1	3.4	6.090909091
R_eJOw0fUqWK2EQzH	1	Jordan	3	0	1	1	2	6	2	4	5	4	3	3	4	2	4	33	7	6	5	3	1	4.375	3.222222222	5	1	3.4	2.818181818
R_eJOw0fUqWK2EQzH	1	Pat	0	2	5	4	2	3	5	1	6	6	6	6	6	3	4	33	7	6	5	3	1	4.375	3.222222222	5	1	3.4	4.545454545
R_eJOw0fUqWK2EQzH	1	Sam	1	4	3	2	3	5	3	1	5	6	4	4	4	1	4	33	7	6	5	3	1	4.375	3.222222222	5	1	3.4	3.272727273
R_eJOw0fUqWK2EQzH	1	Taylor	4	0	1	1	2	6	2	1	6	6	5	2	3	1	4	33	7	6	5	3	1	4.375	3.222222222	5	1	3.4	2.727272727
R_eJzQLLrQTY2MTOZ	2	Adrian	3	0	3	3	3	6	2	2	6	6	4	5	3	1	3	36	6	2	6	4	1	3.875	4	3.666666667	1.375	3.8	3.454545455
R_eJzQLLrQTY2MTOZ	2	Alex	3	0	6	4	5	4	4	3	6	6	6	6	5	2	3	36	6	2	6	4	1	3.875	4	3.666666667	1.375	3.8	4.818181818
R_eJzQLLrQTY2MTOZ	2	Blair	0	3	7	7	5	4	4	3	6	5	6	7	5	6	3	36	6	2	6	4	1	3.875	4	3.666666667	1.375	3.8	5.545454545
R_eJzQLLrQTY2MTOZ	2	C.J.	0	4	5	5	4	3	5	3	6	4	3	5	5	5	3	36	6	2	6	4	1	3.875	4	3.666666667	1.375	3.8	4.545454545
R_eJzQLLrQTY2MTOZ	2	Cameron	0	2	4	3	6	5	3	4	4	6	6	4	6	7	3	36	6	2	6	4	1	3.875	4	3.666666667	1.375	3.8	4.818181818
R_eJzQLLrQTY2MTOZ	2	Chris	0	0	2	2	3	7	1	1	5	4	2	4	3	1	3	36	6	2	6	4	1	3.875	4	3.666666667	1.375	3.8	2.545454545
R_eJzQLLrQTY2MTOZ	2	Jamie	0	0	5	3	4	2	6	4	5	4	1	4	5	6	3	36	6	2	6	4	1	3.875	4	3.666666667	1.375	3.8	4.272727273
R_eJzQLLrQTY2MTOZ	2	Jessie	0	3	6	4	6	2	6	5	6	6	7	6	6	6	3	36	6	2	6	4	1	3.875	4	3.666666667	1.375	3.8	5.818181818
R_eJzQLLrQTY2MTOZ	2	Jordan	0	0	7	6	6	2	6	5	6	6	6	6	6	7	3	36	6	2	6	4	1	3.875	4	3.666666667	1.375	3.8	6.090909091
R_eJzQLLrQTY2MTOZ	2	Pat	2	0	6	5	5	3	5	4	6	5	6	6	5	2	3	36	6	2	6	4	1	3.875	4	3.666666667	1.375	3.8	5
R_eJzQLLrQTY2MTOZ	2	Sam	2	0	5	2	7	3	5	4	6	7	5	5	6	6	3	36	6	2	6	4	1	3.875	4	3.666666667	1.375	3.8	5.272727273
R_eJzQLLrQTY2MTOZ	2	Taylor	0	0	6	6	6	1	7	5	5	6	7	5	6	6	3	36	6	2	6	4	1	3.875	4	3.666666667	1.375	3.8	5.909090909
R_eLnj7g8x3XKAPUp	3	Adrian	0	0	5	4	6	4	4	4	6	6	5	5	5	6	4	43	5	3	5	2	1	3.875	3.888888889	3.666666667	2	3	5.090909091
R_eLnj7g8x3XKAPUp	3	Alex	0	0	4	4	3	3	5	3	6	4	4	5	4	3	4	43	5	3	5	2	1	3.875	3.888888889	3.666666667	2	3	4.090909091
R_eLnj7g8x3XKAPUp	3	Blair	2	0	3	4	5	3	5	4	5	5	3	5	4	5	4	43	5	3	5	2	1	3.875	3.888888889	3.666666667	2	3	4.363636364
R_eLnj7g8x3XKAPUp	3	C.J.	2	0	1	1	1	7	1	2	4	2	1	3	3	1	4	43	5	3	5	2	1	3.875	3.888888889	3.666666667	2	3	1.818181818
R_eLnj7g8x3XKAPUp	3	Cameron	3	0	5	5	6	4	4	4	6	5	5	5	5	4	4	43	5	3	5	2	1	3.875	3.888888889	3.666666667	2	3	4.909090909
R_eLnj7g8x3XKAPUp	3	Chris	0	3	3	3	3	5	3	3	6	5	2	6	3	3	4	43	5	3	5	2	1	3.875	3.888888889	3.666666667	2	3	3.636363636
R_eLnj7g8x3XKAPUp	3	Jamie	0	3	3	3	3	2	6	4	5	4	2	4	4	6	4	43	5	3	5	2	1	3.875	3.888888889	3.666666667	2	3	4
R_eLnj7g8x3XKAPUp	3	Jessie	2	0	2	2	2	6	2	3	4	2	1	3	3	2	4	43	5	3	5	2	1	3.875	3.888888889	3.666666667	2	3	2.363636364
R_eLnj7g8x3XKAPUp	3	Jordan	0	3	3	2	3	3	5	5	5	4	2	4	4	3	4	43	5	3	5	2	1	3.875	3.888888889	3.666666667	2	3	3.636363636
R_eLnj7g8x3XKAPUp	3	Pat	0	0	3	2	4	6	2	4	5	5	2	5	5	5	4	43	5	3	5	2	1	3.875	3.888888889	3.666666667	2	3	3.818181818
R_eLnj7g8x3XKAPUp	3	Sam	0	0	6	6	4	4	4	4	5	6	6	6	5	5	4	43	5	3	5	2	1	3.875	3.888888889	3.666666667	2	3	5.181818182
R_eLnj7g8x3XKAPUp	3	Taylor	0	4	5	5	5	3	5	4	5	5	5	5	5	3	4	43	5	3	5	2	1	3.875	3.888888889	3.666666667	2	3	4.727272727
R_eRHpOollegKnyyF	3	Adrian	0	0	2	2	2	2	6	2	2	2	2	2	2	2	1	44	2	2.25	3			2.75	2.888888889	2.888888889	2.75	2.4	2.363636364
R_eRHpOollegKnyyF	3	Alex	0	0	2	2	2	2	6	2	2	2	2	2	2	2	1	44	2	2.25	3			2.75	2.888888889	2.888888889	2.75	2.4	2.363636364
R_eRHpOollegKnyyF	3	Blair	2	0	2	2	2	2	6	2	2	2	2	2	2	2	1	44	2	2.25	3			2.75	2.888888889	2.888888889	2.75	2.4	2.363636364
R_eRHpOollegKnyyF	3	C.J.	2	0	3	3	3	3	5	3	3	3	3	3	3	3	1	44	2	2.25	3			2.75	2.888888889	2.888888889	2.75	2.4	3.181818182
R_eRHpOollegKnyyF	3	Cameron	3	0	3	3	3	3	5	3	3	3	3	3	3	3	1	44	2	2.25	3			2.75	2.888888889	2.888888889	2.75	2.4	3.181818182
R_eRHpOollegKnyyF	3	Chris	0	3	4	4	4	4	4	4	4	4	4	4	4	4	1	44	2	2.25	3			2.75	2.888888889	2.888888889	2.75	2.4	4
R_eRHpOollegKnyyF	3	Jamie	0	3	3	3	3	3	5	3	3	3	3	3	3	3	1	44	2	2.25	3			2.75	2.888888889	2.888888889	2.75	2.4	3.181818182
R_eRHpOollegKnyyF	3	Jessie	2	0	2	2	2	2	6	2	2	2	2	2	2	2	1	44	2	2.25	3			2.75	2.888888889	2.888888889	2.75	2.4	2.363636364
R_eRHpOollegKnyyF	3	Jordan	0	3	2	2	2	2	6	2	2	2	2	2	2	2	1	44	2	2.25	3			2.75	2.888888889	2.888888889	2.75	2.4	2.363636364
R_eRHpOollegKnyyF	3	Pat	0	0	3	2	3	3	5	3	3	3	3	3	3	3	1	44	2	2.25	3			2.75	2.888888889	2.888888889	2.75	2.4	3.090909091
R_eRHpOollegKnyyF	3	Sam	0	0	4	4	4	4	4	4	4	4	4	4	4	4	1	44	2	2.25	3			2.75	2.888888889	2.888888889	2.75	2.4	4
R_eRHpOollegKnyyF	3	Taylor	0	4	2	2	2	2	6	2	2	2	2	2	2	2	1	44	2	2.25	3			2.75	2.888888889	2.888888889	2.75	2.4	2.363636364
R_erm80RHgczfE3E9	3	Adrian	0	0	5	5	5	2	6	5	5	5	5	5	5	5	2	33	7	5	7	3	1	2.875	4.333333333	4.333333333	1.375	3.9	5.090909091
R_erm80RHgczfE3E9	3	Alex	0	0	3	3	3	4	4	2	5	3	3	3	3	5	2	33	7	5	7	3	1	2.875	4.333333333	4.333333333	1.375	3.9	3.363636364
R_erm80RHgczfE3E9	3	Blair	2	0	2	2	2	5	3	3	5	3	3	5	4	2	2	33	7	5	7	3	1	2.875	4.333333333	4.333333333	1.375	3.9	3.090909091
R_erm80RHgczfE3E9	3	C.J.	2	0	2	2	2	5	3	2	5	5	2	5	5	2	2	33	7	5	7	3	1	2.875	4.333333333	4.333333333	1.375	3.9	3.181818182
R_erm80RHgczfE3E9	3	Cameron	3	0	6	5	5	2	6	4	5	5	5	5	5	3	2	33	7	5	7	3	1	2.875	4.333333333	4.333333333	1.375	3.9	4.909090909
R_erm80RHgczfE3E9	3	Chris	0	3	5	5	3	4	4	4	5	5	5	5	5	3	2	33	7	5	7	3	1	2.875	4.333333333	4.333333333	1.375	3.9	4.454545455
R_erm80RHgczfE3E9	3	Jamie	0	3	5	5	5	4	4	4	5	5	5	5	5	3	2	33	7	5	7	3	1	2.875	4.333333333	4.333333333	1.375	3.9	4.636363636
R_erm80RHgczfE3E9	3	Jessie	2	0	5	5	5	4	4	4	5	5	5	5	5	3	2	33	7	5	7	3	1	2.875	4.333333333	4.333333333	1.375	3.9	4.636363636
R_erm80RHgczfE3E9	3	Jordan	0	3	5	5	5	3	5	5	5	6	5	5	5	3	2	33	7	5	7	3	1	2.875	4.333333333	4.333333333	1.375	3.9	4.909090909
R_erm80RHgczfE3E9	3	Pat	0	0	5	5	5	3	5	5	5	5	5	5	5	5	2	33	7	5	7	3	1	2.875	4.333333333	4.333333333	1.375	3.9	5
R_erm80RHgczfE3E9	3	Sam	0	0	6	6	6	2	6	5	5	6	6	6	6	6	2	33	7	5	7	3	1	2.875	4.333333333	4.333333333	1.375	3.9	5.818181818
R_erm80RHgczfE3E9	3	Taylor	0	4	3	2	2	5	3	2	5	5	5	5	5	2	2	33	7	5	7	3	1	2.875	4.333333333	4.333333333	1.375	3.9	3.545454545
R_ezzMJBl7kLyJ52J	3	Adrian	0	0	5	5	4	3	5	3	5	5	5	5	4	5	5	25	2	3.5	7	4	1	2.25	3.888888889	4.111111111	2	1.8	4.636363636
R_ezzMJBl7kLyJ52J	3	Alex	0	0	5	3	3	5	3	3	7	3	5	5	4	3	5	25	2	3.5	7	4	1	2.25	3.888888889	4.111111111	2	1.8	4
R_ezzMJBl7kLyJ52J	3	Blair	2	0	2	1	2	6	2	2	6	2	2	3	4	1	5	25	2	3.5	7	4	1	2.25	3.888888889	4.111111111	2	1.8	2.454545455
R_ezzMJBl7kLyJ52J	3	C.J.	2	0	2	2	2	5	3	3	5	2	1	3	3	4	5	25	2	3.5	7	4	1	2.25	3.888888889	4.111111111	2	1.8	2.727272727
R_ezzMJBl7kLyJ52J	3	Cameron	3	0	5	5	5	5	3	3	5	6	7	5	4	2	5	25	2	3.5	7	4	1	2.25	3.888888889	4.111111111	2	1.8	4.545454545
R_ezzMJBl7kLyJ52J	3	Chris	0	3	3	2	4	6	2	3	3	3	3	4	4	1	5	25	2	3.5	7	4	1	2.25	3.888888889	4.111111111	2	1.8	2.909090909
R_ezzMJBl7kLyJ52J	3	Jamie	0	3	3	3	3	5	3	3	5	4	3	3	4	2	5	25	2	3.5	7	4	1	2.25	3.888888889	4.111111111	2	1.8	3.272727273
R_ezzMJBl7kLyJ52J	3	Jessie	2	0	5	6	5	3	5	5	5	6	7	6	5	5	5	25	2	3.5	7	4	1	2.25	3.888888889	4.111111111	2	1.8	5.454545455
R_ezzMJBl7kLyJ52J	3	Jordan	0	3	3	3	4	5	3	3	5	4	4	3	4	2	5	25	2	3.5	7	4	1	2.25	3.888888889	4.111111111	2	1.8	3.454545455
R_ezzMJBl7kLyJ52J	3	Pat	0	0	5	5	4	3	5	3	5	6	6	5	4	5	5	25	2	3.5	7	4	1	2.25	3.888888889	4.111111111	2	1.8	4.818181818
R_ezzMJBl7kLyJ52J	3	Sam	0	0	5	3	5	3	5	3	5	6	6	5	5	6	5	25	2	3.5	7	4	1	2.25	3.888888889	4.111111111	2	1.8	4.909090909
R_ezzMJBl7kLyJ52J	3	Taylor	0	4	5	5	5	5	3	3	5	5	5	5	5	2	5	25	2	3.5	7	4	1	2.25	3.888888889	4.111111111	2	1.8	4.363636364
